# Supplementary material for: Construction of a ceRNA network of regulated ferroptosis in doxorubicin-induced myocardial injury
Source: PeerJ. 2023 Jan 25;11:e14767. doi: 10.7717/peerj.14767 (PMC9884038; doi:10.7717/peerj.14767)
Supplement: Supplemental Information 1 [file peerj-11-14767-s001.xlsx]

## Sheet: Sheet1
	CON	DOX			CON	DOX
CK level	83.6	158.84		LDH level	4459.26	6177.78
	108.68	167.2			2651.85	6400
	83.6	142.12			2044.44	6000
	83.6	125.4			2474.07	6385.19
	41.8	183.92			2888.89	6503.7
	83.6	167.2			3022.22	6177.78
average	80.8133	157.447		average	2923.46	6274.07
SD	21.5854	20.7602		SD	826.803	186.866
