# Supplementary material for: Construction of a ceRNA network of regulated ferroptosis in doxorubicin-induced myocardial injury
Source: PeerJ. 2023 Jan 25;11:e14767. doi: 10.7717/peerj.14767 (PMC9884038; doi:10.7717/peerj.14767)
Supplement: Supplemental Information 3 [file peerj-11-14767-s003.xlsx]

## Sheet: miRNAs binding to Becn1
#please cite:
#Zhou KR, Liu S, Cai L, et al. ENCORI: The Encyclopedia of RNA Interactomes.
#2.Li JH, et al.starBase v2.0: decoding miRNA-ceRNA, miRNA-ncRNA and protein-RNA interaction networks from large-scale CLIP-Seq data , Nucleic Acids Res. 2014 Jan;42:D92-7.
miRNAid	miRNAname	geneID	geneName	geneType	chromosome	narrowStart	narrowEnd	broadStart	broadEnd	strand	clipExpNum	degraExpNum	RBP	PITA	RNA22	miRmap	microT	miRanda	PicTar	TargetScan
MIMAT0000157	mmu-miR-145a-5p	ENSMUSG00000035086	Becn1	protein_coding	chr11	101288516	101288521	101288515	101288543	-	4	0	Ago2	1	0	1	1	1	0	0
MIMAT0000213	mmu-miR-184-3p	ENSMUSG00000035086	Becn1	protein_coding	chr11	101288386	101288392	101288385	101288409	-	3	0	Ago2	1	0	1	0	1	0	0
MIMAT0000248	mmu-miR-30e-5p	ENSMUSG00000035086	Becn1	protein_coding	chr11	101288713	101288718	101288712	101288740	-	4	0	Ago1-4,Ago2	1	0	1	1	1	1	1
MIMAT0003729	mmu-miR-216b-5p	ENSMUSG00000035086	Becn1	protein_coding	chr11	101288303	101288309	101288302	101288330	-	2	0	Ago2	1	0	1	1	1	0	1
MIMAT0004577	mmu-miR-299a-3p	ENSMUSG00000035086	Becn1	protein_coding	chr11	101288719	101288724	101288718	101288739	-	4	0	Ago1-4,Ago2	1	0	1	0	1	0	0
MIMAT0004936	mmu-miR-873a-5p	ENSMUSG00000035086	Becn1	protein_coding	chr11	101288494	101288499	101288493	101288513	-	4	0	Ago2	1	0	1	0	1	0	0

## Sheet: lncRNAs binding to miRNAs
miRNAid	miRNAname	geneID	geneName	geneType	chromosome	start	end	strand	clipExpNum	degraExpNum	RBP	merClass	miRseq	align	targetSeq
MIMAT0000157	mmu-miR-145a-5p	ENSMUSG00000099587	Gm28967	sense_intronic	chr6	125186471	125186491	-	2	0	Ago2	8mer	ucCCUAAGGACCCUUUUGACCUg	||| | || |: |||||||	gaGGAAU--UGUGGUAACUGGAa
MIMAT0000157	mmu-miR-145a-5p	ENSMUSG00000056579	Tug1	antisense	chr11	3646768	3646788	-	1	0	Ago2	7mer-m8	uccCUAAGGACCCUUUUGACCUg	|||| | |:|||||||	ccaGAUU--UUCAAGAACUGGAc
MIMAT0000157	mmu-miR-145a-5p	ENSMUSG00000056579	Tug1	antisense	chr11	3646910	3646932	-	2	0	Ago2	8mer	ucccuaaggacccuuUUGACCUg	|||||||	agaaaaaauaaaaucAACUGGAa
MIMAT0000157	mmu-miR-145a-5p	ENSMUSG00000097451	Rian	processed_transcript	chr12	109660903	109660928	+	2	0	Ago2	7mer-m8	uccCUAAGGAC---CCUUUUGACCUg	|| | ||| ||: |||||||	ucuGAGUACUGAGAGGGCAACUGGAc
MIMAT0000213	mmu-miR-184-3p	ENSMUSG00000097971	Gm26917	lincRNA	chr17	39843851	39843878	+	3	0	Ago2	7mer-m8	uggGAAUAGUC---AAG---AGGCAGGu	|| :||:| ||: |||||||	gggCUCGUCGGGGUUUUGGGUCCGUCCc
MIMAT0000213	mmu-miR-184-3p	ENSMUSG00000097971	Gm26917	lincRNA	chr17	39845451	39845472	+	2	2	Ago2	7mer-m8	ugggaauagucAAGAGGCAGGu	| ||||||||	ucgaccuccccUCCUCCGUCCu
MIMAT0000248	mmu-miR-30e-5p	ENSMUSG00000097970	Gm27028	lincRNA	chr1	23291752	23291773	+	3	0	Ago2	7mer-m8	gaaggucagUUCCUACAAAUGu	|||| |||||||	agcugggagAAGGCUGUUUACu
MIMAT0000248	mmu-miR-30e-5p	ENSMUSG00000085438	1700020I14Rik	lincRNA	chr2	119602641	119602662	+	3	0	Ago2	7mer-m8	gaaggucAGUUCCUACAAAUGu	|: :| ||||||||	ugauugcUUUGGAAUGUUUACu
MIMAT0000248	mmu-miR-30e-5p	ENSMUSG00000085438	1700020I14Rik	lincRNA	chr2	119604561	119604580	+	3	0	Ago2	7mer-m8	gaAGGUCAGUUCCUACAAAUGu	| :|||| |||||||	acUGUAGUC--UCUUGUUUACu
MIMAT0000248	mmu-miR-30e-5p	ENSMUSG00000085438	1700020I14Rik	lincRNA	chr2	119604770	119604791	+	1	0	Ago2	8mer	gaaggucaguuccUACAAAUGu	||||||||	ggcauuacugcuuAUGUUUACa
MIMAT0000248	mmu-miR-30e-5p	ENSMUSG00000085438	1700020I14Rik	lincRNA	chr2	119605885	119605906	+	1	0	Ago2	8mer	gaaggucaguuccuACAAAUGu	|||||||	cugugcuguggcucUGUUUACa
MIMAT0000248	mmu-miR-30e-5p	ENSMUSG00000050936	Gm42743	lincRNA	chr3	96269854	96269875	+	4	0	Ago2	7mer-m8	gaaggucaguuccuACAAAUGu	|||||||	aaggagagcuauucUGUUUACg
MIMAT0000248	mmu-miR-30e-5p	ENSMUSG00000106990	Gm42547	TEC	chr6	28212398	28212419	-	2	0	Ago2	8mer	gaaggucaguuCCUACAAAUGu	| :|||||||	guugcuaugcuGUGUGUUUACa
MIMAT0000248	mmu-miR-30e-5p	ENSMUSG00000106990	Gm42547	TEC	chr6	28213310	28213331	-	3	0	Ago2	7mer-m8	gaaggucaguuccuACAAAUGu	|||||||	gacccuucucucacUGUUUACc
MIMAT0000248	mmu-miR-30e-5p	ENSMUSG00000108621	Gm37494	lincRNA	chr7	39566355	39566376	+	2	0	Ago2	7mer-m8	gaaggucaguuccuACAAAUGu	|||||||	ccuuuauuuuucccUGUUUACu
MIMAT0000248	mmu-miR-30e-5p	ENSMUSG00000092341	Malat1	lincRNA	chr19	5800940	5800961	-	4	0	Ago2	7mer-m8	gaaggucaguuccuACAAAUGu	|||||||	cuuggaugguaacuUGUUUACu
MIMAT0003729	mmu-miR-216b-5p	ENSMUSG00000085894	Gm15832	processed_transcript	chr1	39551496	39551517	-	5	0	Ago2	7mer-m8	agUGUAAACGGACGUCUCUAAa	|||||| ||| |||||||	uaACAUUUUCCUAAAGAGAUUu
MIMAT0003729	mmu-miR-216b-5p	ENSMUSG00000097375	6720427I07Rik	lincRNA	chr13	48536063	48536085	-	3	0	Ago2	7mer-m8	agUGU-AAACGGACGUCUCUAAa	|:| ||| |||||||||	gcAUAGUUUUAGGGCAGAGAUUu
MIMAT0004577	mmu-miR-299a-3p	ENSMUSG00000108037	Gm44597	processed_transcript	chr6	125047861	125047885	+	2	0	Ago1-4,Ago2	8mer	uuCGCCAA--AUGGC-AGGGUGUAu	|:|| | | || |||||||	cuGUGGAUCCCAACGAACCCACAUa
MIMAT0004577	mmu-miR-299a-3p	ENSMUSG00000000031	H19	lincRNA	chr7	142575993	142576013	-	2	0	Ago2	7mer-m8	uucgccaaaUGGCAGGGUGUAu	||| |||||||	cgggagaccACC-ACCCACAUc
MIMAT0004577	mmu-miR-299a-3p	ENSMUSG00000092203	1110038B12Rik	processed_transcript	chr17	34950701	34950723	-	2	0	Ago2	7mer-m8	uuCGCCAAAUGGCA-GGGUGUAu	|| |||::| | |||||||	caGCCCUUUGUCCUGCCCACAUg
MIMAT0004577	mmu-miR-299a-3p	ENSMUSG00000092203	1110038B12Rik	processed_transcript	chr17	34952291	34952312	-	3	0	Ago2	7mer-m8	uucgCCAAAUGGCAGGGUGUAu	||| |: :| |||||||	gccgGGUAUGAUGACCCACAUu
MIMAT0004577	mmu-miR-299a-3p	ENSMUSG00000102828	Gm38182	processed_transcript	chr18	37840357	37840379	+	3	0	Ago1-4,Ago2	7mer-m8	uucgccaAAUGGCA-GGGUGUAu	| |::|| |||||||	caaucagUGAUUGUACCCACAUg
MIMAT0004577	mmu-miR-299a-3p	ENSMUSG00000096056	Gm21986	processed_transcript	chrX	101319667	101319689	+	4	0	Ago2	7mer-m8	uucgccaaaUGGC-AGGGUGUAu	|| | ||||||||	acaccacccACAGCUCCCACAUc
MIMAT0004936	mmu-miR-873a-5p	ENSMUSG00000099519	Gm29253	processed_transcript	chr1	75181797	75181817	-	2	0	Ago2	7mer-m8	ucCUCUGAGUGUUCAAGGACg	| | :|:::: |||||||	ugGUGUUUUGUGUGUUCCUGc
MIMAT0004936	mmu-miR-873a-5p	ENSMUSG00000104525	Gm37334	TEC	chr1	194994201	194994228	+	2	0	Ago2	7mer-m8	uccUCUGA-GUGUU------CAAGGACg	:|||| ||||| |||||||	cauGGACUACACAAGGGUUUGUUCCUGg
MIMAT0004936	mmu-miR-873a-5p	ENSMUSG00000056579	Tug1	antisense	chr11	3644252	3644274	-	2	0	Ago2	8mer	uccUCUGAGU-GUU-CAAGGACg	|| :|:: :|| |||||||	uuaAGUUUUGUUAAUGUUCCUGa

## Sheet: lncRNAs intersected result
miRNAid	miRNAname	geneID	geneName	geneType	chromosome	start	end	strand	clipExpNum	degraExpNum	RBP	merClass	miRseq	align	targetSeq
MIMAT0000157	mmu-miR-145a-5p	ENSMUSG00000056579	Tug1	antisense	chr11	3646768	3646788	-	1	0	Ago2	7mer-m8	uccCUAAGGACCCUUUUGACCUg	|||| | |:|||||||	ccaGAUU--UUCAAGAACUGGAc
MIMAT0000157	mmu-miR-145a-5p	ENSMUSG00000097451	Rian	processed_transcript	chr12	109660903	109660928	+	2	0	Ago2	7mer-m8	uccCUAAGGAC---CCUUUUGACCUg	|| | ||| ||: |||||||	ucuGAGUACUGAGAGGGCAACUGGAc
MIMAT0000248	mmu-miR-30e-5p	ENSMUSG00000092341	Malat1	lincRNA	chr19	5800940	5800961	-	4	0	Ago2	7mer-m8	gaaggucaguuccuACAAAUGu	|||||||	cuuggaugguaacuUGUUUACu
MIMAT0004577	mmu-miR-299a-3p	ENSMUSG00000000031	H19	lincRNA	chr7	142575993	142576013	-	2	0	Ago2	7mer-m8	uucgccaaaUGGCAGGGUGUAu	||| |||||||	cgggagaccACC-ACCCACAUc
