# Supplementary material for: Construction of a ceRNA network of regulated ferroptosis in doxorubicin-induced myocardial injury
Source: PeerJ. 2023 Jan 25;11:e14767. doi: 10.7717/peerj.14767 (PMC9884038; doi:10.7717/peerj.14767)
Supplement: Supplemental Information 8 [file peerj-11-14767-s008.xls]

## Sheet: Metadata Template
# Use this template for a Agilent one-color experiment submission.
# Normalized data are provided in a Matrix table. Click on additional worksheet tabs below for examples.
# Incomplete submissions will be returned. Click the Metadata Example tab below to view a completed worksheet.
# Field names (in blue on this page) should not be edited. Hover over cells containing field names to view field content guidelines or,
# CLICK HERE for Field Content Guidelines Web page.
# If you are submitting data associated with Copy Number Variation detection, consider submitting your Copy Number Variation calls to dbVar (http://www.ncbi.nlm.nih.gov/dbvar). This will allow users to easily see your results (with links to the raw data) and to view your results in the context of other CNV and structural variation studies. dbVar submission instructions are at http://www.ncbi.nlm.…
SERIES
# This section describes the overall experiment.
title	Construction ceRNA network of regulated ferroptosis in doxorubicin induced myocardial injury
summary	Based on the microarray detection results and bioinformatics analysis, we screened ferroptosis related gene Becn1 and constructed the lncRNA/miRNA/mRNA ceRNA network of regulated ferroptosis in DIMI.
overall design	7 samples were divided into two groups,n=3 in control group and n=4 in DOX group
contributor	Ye Hongwei, Li Yuping, Li Lu, Huang Yuhui, Wang Jiahui, Gao Qin
SAMPLES
# The Sample names in the first column are arbitrary but they must match the column headers of the Matrix table (see next worksheet).
# CLICK HERE to find the accession number (GPLxxxx) of the Agilent platform deposited in GEO.
Sample name	title	raw data file	source name	organism	characteristics: tag	characteristics: tag	molecule	label	description	platform or Agilent design ID
SAMPLE 1	C1	C1.txt	C1	mouse	tissue	heart	total RNA	Cy3		GPL26963 Agilent-085982
SAMPLE 2	C2	C2.txt	C2	mouse	tissue	heart	total RNA	Cy3		GPL26963 Agilent-085982
SAMPLE 3	C3	C3.txt	C3	mouse	tissue	heart	total RNA	Cy3		GPL26963 Agilent-085982
SAMPLE 4	DOX-1	DOX-1.txt	DOX-1	mouse	tissue	heart	total RNA	Cy3		GPL26963 Agilent-085982
SAMPLE 5	DOX-2	DOX-2.txt	DOX-2	mouse	tissue	heart	total RNA	Cy3		GPL26963 Agilent-085982
SAMPLE 6	DOX-4	DOX-4.txt	DOX-4	mouse	tissue	heart	total RNA	Cy3		GPL26963 Agilent-085982
SAMPLE 7	DOX-5	DOX-5.txt	DOX-5	mouse	tissue	heart	total RNA	Cy3		GPL26963 Agilent-085982
PROTOCOLS
# Protocols which are applicable to specific Samples or specific channels can be included in additional columns of the SAMPLES section instead.
growth protocol	Male C57BL/6J mice were subjected to the standard humidity/temperature-controlled environment with a12h-12h light-dark cycle and were fed with sterile rodent food and water.
treatment protocol	The mice were given with saline or DOX through single intraperitoneal injection.
extract protocol	RNA quantity and quality were measured by NanoDrop ND-1000
label protocol	Sample labeling and array hybridization were performed according to the Agilent One-Color Microarray-Based Gene Expression Analysis protocol (Agilent Technology) with minor modifications.Briefly, mRNA was purified from total RNA after removal of rRNA (mRNA-ONLY™ Eukaryotic mRNA Isolation Kit, Epicentre).
hyb protocol	Then, each sample was amplified and transcribed into fluorescent cRNA along the entire length of the transcripts without 3' bias utilizing a random priming method (Arraystar Flash RNA Labeling Kit, Arraystar). The labeled cRNAs were purified by RNeasy Mini Kit (Qiagen). The concentration and specific activity of the labeled cRNAs (pmol Cy3/μg cRNA) were measured by NanoDrop ND-1000. 1 μg of each …
scan protocol	The hybridized arrays were washed, fixed and scanned with using the Agilent DNA Microarray Scanner (part number G2505C)
data processing	Agilent Feature Extraction software (version 11.0.1.1) was used to analyze acquired array images. Quantile normalization and subsequent data processing were performed with using the GeneSpring GX v12.1 software package (Agilent Technologies).
value definition	Differentially expressed LncRNAs and mRNAs with statistical significance between the two groups were identified through P-value/FDR filtering. Differentially expressed LncRNAs and mRNAs between the two samples were identified through Fold Change filtering.

## Sheet: Matrix Template
# Example of a matrix table for a Agilent one-color submission. Only column headers are shown.
# The identifiers in the ID_REF column must match the identifiers in the ID column of the referenced platform (GPL26963).
# Include the Agilent Probe Names (e.g., A_23_P158231) in the ID_REF column.
# If the Agilent Probe Names are not unique, we strongly recommend that you also provide the Agilent Feature Numbers in an additional column.
# These numerical identifiers are usually included in the raw data files' RefNumber or FeatureNum columns. This will allow us to generate Sample
# data tables and make your study available for our GEO2R analysis tool.
# The Matrix table should include normalized signal intensities.
# Values that should be disregarded may either be left blank or labeled as "null".
# Column names must match Sample names in metadata worksheet.
ID_REF	DOX-1	DOX-2	DOX-4	DOX-5	C1	C2	C3
ASMM10LNC1A108202689V4	10.5321	10.0861	10.4749	10.0081	11.4678	11.8476	11.713
ASMM10LNC1A100057884V4	11.1281	10.977	10.8907	11.5237	12.6285	12.3579	12.5747
ASMM10AP1B100184871V4	11.3145	10.6357	10.7967	11.2355	10.4059	10.144	10.151
ASMM10LNC1A107326305V4	7.87455	7.62174	8.04551	7.58195	7.9996	7.68004	7.96393
ASMM10LNC1A101674597V4	8.08126	7.65922	7.79942	8.17466	6.83774	6.66782	7.07127
ASMM10LNC1A100063229V4	3.65658	2.37482	3.53326	2.66986	3.41289	3.84888	3.10258
ASMM10AP1B100104146V4	10.3081	10.1908	10.1676	10.4463	11.25	10.9437	10.9547
ASMM10AP1B108586521V4	2.42774	2.37482	2.34951	3.81165	2.93255	2.5311	2.92931
ASMM10AP1B127959957V4	4.07974	4.12723	4.397	4.34014	4.94234	4.39348	4.61558
ASMM10LNC1A100116928V4	11.4369	10.9116	10.9655	10.8142	10.2624	9.60594	10.1082
ASMM10AP1B116097628V4	7.2758	7.04225	7.19564	7.32145	7.40549	7.33603	7.3433
ASMM10P029304V4	6.56971	6.72248	6.51629	6.36633	5.39786	5.06474	5.43661
ASMM10LNC1A105180845V4	6.85958	6.76729	6.65494	6.95437	6.50717	6.28502	6.42656
ASMM10AP1B126903151V4	9.59161	9.39908	9.95133	9.79194	10.0657	10.1935	10.1871
ASMM10P056243V4	2.42774	2.37482	2.34951	2.35039	2.32254	2.40881	2.32205
ASMM10AP1B120729210V4	6.87889	6.77883	6.60577	6.79993	6.22447	6.20591	6.43171
ASMM10LNC1A105411663V4	7.65775	7.72514	7.47794	7.90864	7.6351	7.54941	7.83097
ASMM10AP1B105766026V4	7.67705	8.96364	8.95386	7.85586	7.18366	7.20193	7.29616
ASMM10LNC1A100793078V4	5.86391	5.68992	5.5804	5.62294	6.08194	5.50177	5.71998
ASMM10P037015V4	6.00227	6.02941	6.01827	6.13838	6.67843	5.66087	6.20773
ASMM10AP1B102086245V4	11.0895	10.6388	10.7725	11.018	10.6419	10.3321	10.3573
ASMM10AP1B103584165V4	14.4788	14.5211	14.2883	14.2512	14.3393	14.1073	14.4462
ASMM10P011792V4	3.88024	3.77871	3.76587	3.59694	2.45278	2.60095	2.32205
ASMM10LNC1A100021214V4	3.99623	4.05134	4.29348	4.59314	4.95168	3.9994	5.1638
ASMM10P039363V4	5.72765	4.94029	5.61286	5.34137	4.14686	3.71224	3.83828
ASMM10LNC1A106987992V4	5.55811	5.49788	5.29847	5.96542	5.03768	5.23107	5.33821
ASMM10AP1B113935980V4	13.0095	12.5942	12.5278	12.7479	12.1287	11.9649	12.1191
ASMM10P013528V4	13.0111	13.2387	12.826	13.2027	13.077	13.0994	13.4007
ASMM10LNC1A100016141V4	2.42774	2.37482	2.34951	2.35039	2.32254	2.3219	2.32205
ASMM10LNC1A100002390V4	3.78249	4.3358	4.10203	4.06099	4.42178	4.23959	5.07729
ASMM10AP1B100117234V4	12.5558	12.6211	13.2307	12.7837	13.3618	13.3535	13.7387
ASMM10AP1B118981811V4	5.33457	4.97975	5.29767	4.73204	6.08459	6.4011	6.46915
ASMM10AP1B119144130V4	4.49544	4.23924	5.454	3.20334	6.01102	5.39542	5.53235
ASMM10AP1B102057684V4	4.05066	3.71553	4.17858	3.94557	2.4375	3.80024	3.91964
ASMM10LNC1A100088636V4	7.83157	5.96964	5.44067	6.59506	5.14238	5.14973	5.4254
ASMM10AP1B110741515V4	16.8503	6.35504	6.32869	5.94216	7.6593	7.53894	7.72225
ASMM10AP1B101120462V4	8.96046	8.55622	8.39108	9.1764	9.1105	9.09188	9.18003
ASMM10LNC1A106672932V4	2.42774	2.37482	2.34951	2.35039	2.32254	2.3219	2.36115
ASMM10AP1B114791427V4	6.68353	7.00357	7.02172	7.00236	6.77391	6.83623	6.94783
ASMM10LNC1A100058638V4	9.45652	9.20446	9.14811	9.79487	9.56246	9.30304	9.44672
ASMM10P025834V4	3.22631	3.37846	3.1361	3.36102	4.07654	2.56178	4.38774
ASMM10LNC1A105871622V4	11.9313	11.9522	12.1878	11.9262	12.1655	12.32	12.297
ASMM10AP1B107206278V4	8.14318	8.85087	7.69953	7.56663	6.3531	6.13998	6.66843
ASMM10P058251V4	6.7306	6.67429	6.75532	7.09574	6.57938	6.24482	6.41215
ASMM10AP1B115372967V4	2.42774	2.72397	2.94095	2.62327	4.06463	3.30339	4.53016
ASMM10AP1B111855076V4	12.235	12.1499	12.6638	12.4568	12.2017	12.0578	12.2111
ASMM10LNC1A109644461V4	9.44856	9.67913	9.63023	9.99088	9.25984	9.09473	9.44226
ASMM10UP392V4	11.2379	10.979	11.3152	11.8762	11.0349	11.3379	11.2936
ASMM10AP1B106928745V4	12.5403	12.3176	12.1849	12.3386	13.6653	13.9982	13.9635
ASMM10AP1B127421362V4	3.68252	2.99197	3.58516	3.52142	4.38955	4.22312	4.35927
ASMM10AP1B110904708V4	5.04264	5.05549	5.00226	5.01862	4.70699	4.87971	4.60357
ASMM10UP555V4	2.42774	2.37482	2.34951	2.35039	2.32254	2.3219	2.32205
ASMM10AP1B114729110V4	7.02496	8.92883	8.74335	6.92457	6.01147	6.02701	6.43994
ASMM10LNC1A110146835V4	6.06226	6.12597	5.98664	6.41324	5.41896	5.64285	5.75072
ASMM10AP1B105725644V4	11.1949	11.1011	11.1107	11.3515	10.6061	10.4603	10.5564
ASMM10P045942V4	7.18884	8.70989	8.59248	6.49523	2.61488	3.49194	4.67495
ASMM10LNC1A111848582V4	6.1567	5.84443	6.06522	6.22382	6.21903	6.06584	6.43401
ASMM10LNC1A100057827V4	2.42774	2.37482	2.34951	2.66605	4.25023	4.34398	4.22333
ASMM10P032154V4	7.12274	7.14841	7.16812	7.26173	6.76214	6.62795	6.74165
ASMM10LNC1A114863480V4	4.17605	2.87155	4.04372	4.13652	3.62138	3.41897	3.50851
ASMM10AP1B119620619V4	8.51774	8.17054	8.41362	8.79212	8.4635	8.12794	8.29206
ASMM10AP1B107685222V4	8.23242	8.0259	7.81249	7.7263	8.73436	8.88699	9.13185
ASMM10AP1B112566040V4	11.2762	11.2678	11.1804	11.3076	11.0486	11.0486	11.0966
ASMM10LNC1A100079868V4	4.19092	4.56969	4.18399	4.6687	4.05239	3.82391	2.56098
ASMM10LNC1A100073719V4	11.4892	11.4975	11.21	11.6197	9.97678	9.6924	9.77078
ASMM10P013242V4	4.16371	4.39372	3.9835	4.2874	2.32254	3.01727	3.18451
mouselincRNA0063+_P1V4	2.42774	2.37482	2.34951	2.35039	3.09803	2.3219	2.32205
ASMM10AP1B101654652V4	3.74137	2.89179	2.60416	3.45802	3.60643	3.50399	3.43157
ASMM10LNC1A105469831V4	6.15963	5.85068	6.0733	5.95351	7.40502	7.65556	7.47848
ASMM10AP1B105073056V4	4.96039	5.08232	5.74295	4.78757	5.42863	5.26281	5.16072
ASMM10LNC1A103730609V4	11.127	11.2878	11.5787	11.4062	13.0974	13.1243	13.0366
ASMM10AP1B100102185V4	10.1455	10.932	10.0676	10.2526	10.9677	10.8088	10.9924
ASMM10LNC1A106299203V4	7.35103	7.25862	7.21551	7.40754	8.06695	8.08348	8.17466
ASMM10AP1B100082063V4	10.9963	11.1503	11.8297	12.1339	11.603	12.1006	12.713
ASMM10LNC1A103652228V4	5.85265	5.50132	6.24889	5.03397	7.1528	7.23765	7.30977
ASMM10AP1B105723693V4	8.33877	7.65123	8.24101	8.54116	8.75329	8.74371	8.51914
ASMM10P046495V4	6.9845	6.5018	6.8652	7.03987	7.55564	7.50422	7.14029
ASMM10AP1B105867090V4	2.42774	2.37482	2.34951	2.35039	3.06471	2.40467	2.32205
ASMM10P039897V4	9.53446	9.84161	9.32746	9.85397	7.05785	6.98818	7.1644
ASMM10LNC1A100026469V4	7.44479	5.7348	7.39057	7.25076	7.40031	7.38307	7.25928
ASMM10AP1B127878146V4	5.26276	4.6623	4.6623	5.09337	4.89323	5.1984	4.89127
ASMM10AP1B114643305V4	5.80942	5.79007	5.84747	5.74035	5.47605	5.10413	5.23541
ASMM10LNC1A100079904V4	4.15432	4.58342	4.24093	4.64155	3.71828	4.02891	2.74018
ASMM10AP1B128116850V4	7.55159	7.39012	7.25113	7.89178	7.75803	7.57549	7.37592
ASMM10LNC1A112768441V4	5.2945	5.38905	5.54808	5.06759	6.32884	6.29443	5.78687
ASMM10P010547V4	6.62022	6.74246	6.73754	5.86268	7.02827	6.95969	7.19877
ASMM10LNC1A118233147V4	10.5396	9.93457	9.85206	10.4892	10.2447	9.87879	9.38047
ASMM10AP1B112049765V4	5.07258	4.87035	4.93208	5.01658	4.76507	4.70478	4.37435
ASMM10AP1B100527066V4	5.70172	5.29604	5.48682	5.8909	6.82785	6.74398	6.79392
ASMM10AP1B100041011V4	7.15566	6.78536	7.36826	6.88553	7.85503	7.75209	7.87727
ASMM10LNC1A105673010V4	2.42774	2.37482	2.34951	2.35039	2.84446	2.40675	2.32205
ASMM10LNC1A100092184V4	11.0027	10.8155	10.9111	10.9871	11.7685	11.5231	11.2995
ASMM10AP1B105332522V4	7.69203	7.36057	7.55011	7.32786	8.603	8.86049	8.88771
ASMM10LNC1A100480821V4	7.41477	6.44731	6.63198	7.05302	7.66671	7.67915	7.44045
ASMM10LNC1A100073877V4	8.26354	9.10879	8.00219	8.16858	6.61708	6.48786	6.28817
ASMM10P030946V4	5.29393	6.12426	4.98795	5.65137	4.04515	4.54339	4.06485
ASMM10LNC1A115648735V4	6.27948	6.27335	6.50079	5.83287	6.92478	7.17874	7.03673
ASMM10LNC1A109012028V4	6.78084	6.53892	7.11001	6.13643	5.85247	5.88562	5.29858
ASMM10LNC1A113556277V4	11.2729	11.0062	11.9405	8.8485	11.5033	12.0101	11.8201
ASMM10LNC1A106945507V4	9.14113	8.7082	9.186	8.48902	11.106	11.4072	11.3092
ASMM10AP1B100040731V4	3.29924	3.2024	2.34951	4.08099	2.32254	2.3219	2.32205
ASMM10LNC1A113248387V4	6.38205	6.15316	6.21608	6.4734	6.62231	6.24844	6.64548
ASMM10AP1B119421708V4	4.42272	4.41426	4.52645	4.2261	6.38933	6.34568	6.15077
ASMM10LNC1A112077303V4	4.09449	4.24795	4.59191	4.57117	5.21537	4.81535	4.45986
ASMM10AP1B125463175V4	5.14137	4.85314	4.6174	4.8304	5.94401	5.93621	5.97806
ASMM10AP1B100084823V4	8.47665	8.27917	8.42452	8.57862	8.8758	8.72412	8.69375
ASMM10P029034V4	8.44674	8.46323	8.1504	7.91955	9.45906	9.61315	9.62571
ASMM10LNC1A100068360V4	6.02894	6.51007	6.04173	6.31156	4.02414	4.07851	3.48156
ASMM10LNC1A100111565V4	3.8041	4.25554	3.51814	4.44008	3.60468	2.34555	3.30736
ASMM10AP1B100024564V4	8.47365	9.06552	9.0152	8.62469	8.232	8.07802	8.13434
MM9LINCRNAEXON11230+_P1V4	3.84151	3.67834	3.8371	3.81214	4.00983	4.11995	3.69214
ASMM10LNC1A100015614V4	2.42774	2.37482	2.34951	2.35039	2.32254	2.3219	2.32205
ASMM10LNC1A102128986V4	3.07797	3.15318	3.23347	3.60782	5.43373	5.28736	4.87503
ASMM10LNC1A100025978V4	2.42774	2.37482	2.34951	2.35039	2.32254	2.49535	2.32205
ASMM10AP1B112117718V4	3.65539	3.5235	3.87569	3.93175	3.46526	2.70702	3.76422
ASMM10LNC1A102756043V4	7.80547	7.1934	7.98987	7.55192	8.46841	8.59145	8.59071
mouselincRNA0463+_P1V4	2.97864	2.37482	2.34951	3.05497	2.32254	2.3219	2.32205
ASMM10LNC1A100683176V4	7.85809	8.33977	8.30261	7.64731	7.9619	7.92155	7.86363
ASMM10LNC1A109653094V4	5.71447	5.51235	5.5089	5.56844	6.04098	5.94875	5.63097
ASMM10AP1B128389884V4	6.4627	6.81868	6.29687	6.38569	6.02458	5.74986	5.85401
ASMM10AP1B100083411V4	14.6558	15.1039	15.1429	14.376	15.109	15.2353	15.2672
ASMM10LNC1A100043162V4	11.5135	11.0484	10.9909	11.7124	9.54672	9.41148	9.61846
ASMM10AP1B104698043V4	8.13882	9.13432	9.06619	8.10908	8.43635	8.60123	8.61222
ASMM10AP1B104862528V4	9.47688	10.5467	12.8701	9.13522	8.17043	8.07879	7.95389
ASMM10AP1B115724118V4	9.81011	9.94346	9.96117	9.94734	9.15846	8.97691	9.12978
humanlincRNA1262-_P1V4	4.60641	4.17717	4.60424	4.61582	2.48284	2.89732	3.14697
ASMM10LNC1A107174391V4	10.1254	10.2714	10.3092	10.1404	9.81576	9.81588	9.8736
ASMM10P043080V4	4.67763	4.34387	4.24731	4.6175	3.74262	3.91396	3.84777
ASMM10LNC1A100671213V4	3.15057	2.81584	2.75949	2.52381	5.27484	5.08717	5.07357
ASMM10LNC1A112157555V4	4.73754	4.53754	4.23102	3.68987	5.52698	5.18223	4.84251
ASMM10AP1B108602344V4	9.56784	9.38523	9.46608	9.08374	9.34045	9.46102	9.37839
ASMM10P055989V4	4.08204	3.99521	4.4771	4.38312	4.5086	3.62716	4.32917
ASMM10LNC1A100084387V4	6.67646	6.76034	6.56604	7.16141	6.4153	6.12582	6.41821
ASMM10LNC1A100070642V4	2.42774	2.37482	2.34951	2.35039	2.5436	2.39817	2.32205
ASMM10AP1B104881687V4	5.41117	5.0953	5.10966	5.17421	5.99974	5.94463	5.69945
ASMM10LNC1A100021343V4	10.7797	10.6827	10.7845	10.9978	10.6118	10.2579	10.3722
ASMM10LNC1A100005221V4	2.42774	2.37482	2.72452	3.13228	5.00498	4.26668	4.43285
ASMM10LNC1A100079297V4	5.23156	5.48735	5.21393	5.43217	5.88181	5.58446	5.41706
ASMM10AP1B100098613V4	6.84785	7.0343	6.83316	7.01865	6.44111	6.43932	6.62638
ASMM10LNC1A109156656V4	4.61207	4.67689	4.57975	4.5849	3.77277	3.96649	4.00153
ASMM10AP1B104481953V4	8.70837	8.34347	9.06819	8.82366	9.10274	9.10986	9.20666
ASMM10AP1B115440881V4	10.8972	10.9595	11.1343	11.3092	10.9721	11.0434	11.1435
ASMM10AP1B100453261V4	8.11501	8.01915	8.09095	8.18515	9.6103	9.28425	9.58388
ASMM10AP1B117006261V4	6.23737	6.01873	6.30071	6.17861	6.98096	6.5966	6.67269
ASMM10P043132V4	5.21912	5.06188	5.26522	5.31844	5.22185	5.39192	5.15712
ASMM10P036986V4	7.39713	7.75906	7.31181	7.31075	8.62925	8.60556	8.67077
ASMM10LNC1A105998848V4	4.54454	4.38394	4.05801	4.16461	5.51508	5.23963	5.13236
ASMM10LNC1A105684501V4	9.40816	8.8997	8.85824	9.71625	8.59009	8.35838	8.52278
ASMM10LNC1A100011098V4	6.45682	6.58584	6.47388	6.83267	4.60641	3.90331	4.36152
ASMM10P045890V4	5.43761	4.98846	4.58504	5.69968	3.40889	3.73453	3.20544
ASMM10LNC1A100100459V4	5.19644	5.5489	5.19997	5.37232	6.44422	6.19407	6.08431
ASMM10LNC1A100582833V4	5.99889	6.25124	5.8546	5.97453	5.13672	5.15024	5.16605
ASMM10AP1B129167381V4	7.33864	7.2644	7.25303	7.22146	7.95844	7.68545	7.93137
ASMM10P050614V4	6.53154	6.61788	6.2994	6.66463	6.15258	6.21173	6.4434
ASMM10AP1B110027105V4	8.39415	8.56175	8.24592	7.87793	9.73054	9.6621	9.59923
ASMM10LNC1A110945963V4	7.90992	7.42919	7.78062	7.86128	8.62943	9.06633	8.93606
ASMM10LNC1A105173512V4	2.42774	2.37482	2.34951	2.35039	3.57358	2.43766	2.48651
ASMM10LNC1A100143241V4	7.0546	6.9856	6.94517	7.10418	5.71149	5.92847	6.28258
ASMM10LNC1A105699760V4	6.67675	6.45102	6.40709	6.58289	5.11151	5.15332	4.7507
ASMM10AP1B102386189V4	5.49469	5.71735	5.3966	5.60124	4.64788	4.75451	4.78766
ASMM10LNC1A100067874V4	5.99112	5.92425	5.906	6.28463	5.3504	5.16235	5.20309
ASMM10P050075V4	7.91255	7.65556	7.84531	9.24204	7.46477	7.59161	7.46542
ASMM10AP1B100050224V4	4.23545	3.41543	3.34129	3.49216	4.3402	4.04961	3.66347
ASMM10LNC1A100053336V4	7.96384	7.16345	7.77141	7.76107	6.72093	6.75913	6.58171
ASMM10AP1B107490933V4	10.0366	9.54838	10.4083	9.36138	11.5358	11.8442	11.8481
ASMM10LNC1A101153286V4	4.60092	5.53243	5.60621	6.00435	6.27864	6.32869	6.33629
ASMM10LNC1A100116972V4	11.6465	11.6744	11.6902	11.4693	10.3776	10.2197	10.2345
ASMM10P030714V4	5.2532	5.32827	5.41346	5.19564	4.19471	4.12674	3.70598
ASMM10LNC1A114657134V4	4.18849	4.16389	3.85983	4.33857	3.72133	2.95538	4.19191
ASMM10AP1B100088792V4	7.83702	7.67995	8.02141	7.9437	7.43351	7.31407	7.54056
ASMM10AP1B105937503V4	13.7136	13.7947	13.8608	14.2336	13.0021	12.5673	12.8328
ASMM10AP1B108254473V4	2.42774	2.37482	2.34951	2.35039	2.44863	3.16366	3.53996
ASMM10AP1B100143423V4	10.2563	10.184	10.1052	10.3673	8.72835	8.66598	8.79714
ASMM10AP1B107143870V4	7.57358	7.27927	7.5936	7.195	9.08274	9.26341	9.10181
ASMM10LNC1A106177305V4	3.57239	2.86477	2.34951	2.79019	4.13294	3.90146	4.49896
ASMM10AP1B100199019V4	6.65615	7.00909	6.3045	6.00583	5.78913	5.7239	5.56509
ASMM10AP1B100171669V4	8.92599	8.99353	9.1879	9.10473	10.0602	9.99812	10.245
ASMM10LNC1A100005376V4	11.482	12.0702	11.4402	11.8159	8.76074	8.6528	8.90039
humanlincRNA1524+_P1V4	4.27674	3.99623	4.37766	3.85521	3.6203	4.10925	4.05305
ASMM10LNC1A104675998V4	4.65804	5.02781	4.56623	5.05498	6.19489	5.5524	5.88333
ASMM10P057566V4	5.06101	5.07224	5.15554	5.2178	4.52891	4.77857	4.84223
ASMM10LNC1A100066828V4	7.84691	7.9683	8.01298	7.67312	8.81894	8.70702	8.95042
ASMM10LNC1A108010516V4	5.4889	5.34223	5.35553	5.22606	6.53718	6.1715	6.52382
ASMM10LNC1A106155206V4	2.42774	2.37482	2.34951	2.35039	3.73028	2.95568	2.87744
ASMM10AP1B109458551V4	6.88166	6.50042	6.5678	7.14609	7.74869	7.9432	8.03316
ASMM10P025603V4	6.52263	7.35816	7.3848	6.54909	7.00414	5.88461	6.79846
ASMM10AP1B101086294V4	6.48799	6.58502	6.53681	5.83162	6.44593	6.08781	6.06742
ASMM10P016495V4	6.69155	6.42299	6.2015	6.76066	5.98247	5.90984	5.68896
ASMM10LNC1A111446311V4	8.89014	8.62589	9.21417	6.90941	11.0635	10.9939	11.1079
ASMM10AP1B125963868V4	10.3919	10.2111	10.2072	10.4618	11.9198	11.8979	12.02
ASMM10AP1B105541275V4	4.60876	4.08704	4.58049	3.80617	5.3544	5.40925	5.2784
ASMM10LNC1A101661911V4	6.57905	6.71864	6.32117	6.76847	6.37095	6.13031	6.35996
ASMM10LNC1A104257281V4	17.6228	8.0155	8.63983	8.13072	9.7409	9.81486	10.1866
ASMM10P054723V4	11.823	11.8073	11.7957	12.0641	10.2758	10.1757	10.3793
ASMM10LNC1A114549790V4	5.35283	5.34079	5.23594	5.5364	4.30537	4.67113	5.14501
ASMM10P041143V4	5.69906	5.6475	5.72759	6.09413	5.57893	5.38905	5.54298
ASMM10LNC1A106679853V4	5.88738	5.47958	5.31157	6.12565	4.62476	4.78826	4.86732
ASMM10LNC1A100019095V4	5.99605	6.3338	5.86537	5.52634	5.83276	5.64443	6.26186
ASMM10LNC1A100090189V4	6.918	6.90843	6.73846	7.12868	6.20212	6.30605	6.54046
ASMM10LNC1A105499682V4	8.62483	8.57842	8.53578	8.48592	8.78596	8.6663	8.81188
ASMM10LNC1A108311750V4	11.4332	11.2944	12.1645	10.681	13.5144	13.8994	13.7841
ASMM10AP1B100198243V4	10.7022	10.885	11.2762	9.83592	12.4726	12.151	12.5397
ASMM10AP1B114583209V4	6.8916	7.25447	7.39532	7.24281	7.26691	7.23021	7.67987
ASMM10AP1B105369191V4	5.71998	6.28946	6.56679	6.77497	7.12965	6.98779	7.38391
ASMM10P034124V4	2.42774	2.37482	2.34951	2.35039	3.72281	3.35823	4.06427
ASMM10LNC1A117898879V4	7.01159	7.62602	7.38893	7.85809	8.46055	8.40367	8.66474
ASMM10LNC1A100026764V4	6.11542	6.76648	6.21051	6.12426	7.00972	6.38754	6.88726
ASMM10LNC1A102428582V4	11.1804	11.7327	11.091	11.5804	9.21473	9.43844	9.51299
ASMM10P010234V4	7.48892	7.38722	7.30095	7.51693	7.17281	7.16752	7.18701
ASMM10AP1B109626503V4	5.16918	5.18392	4.88673	4.83383	4.86915	5.27387	5.56049
ASMM10LNC1A108678705V4	5.66887	5.51433	5.44151	5.86322	5.14846	5.22826	5.69671
ASMM10LNC1A102334985V4	8.7193	8.82281	9.27898	7.48879	10.4586	10.5962	10.848
ASMM10LNC1A101650049V4	5.30986	4.84801	5.37564	5.43657	4.9388	4.98714	5.23209
ASMM10AP1B124352039V4	11.5784	11.4979	11.811	10.885	11.8169	11.9574	11.9783
ASMM10LNC1A102681744V4	9.81167	9.38565	9.8312	9.89348	10.2495	10.679	10.364
ASMM10AP1B100127722V4	11.352	10.346	11.1485	11.5417	11.0434	10.9159	10.9846
ASMM10AP1B123582858V4	9.16628	9.76373	9.84656	9.23947	9.69783	9.56871	10.014
ASMM10AP1B113681221V4	6.37155	5.85211	6.32485	6.45888	6.30421	6.47996	6.56623
ASMM10LNC1A101649108V4	14.5614	14.6534	14.6526	14.9152	13.9346	13.7642	14.0823
ASMM10P031101V4	2.42774	3.60008	3.26087	2.98924	4.05979	3.19008	3.58971
ASMM10LNC1A100089787V4	2.42774	2.37482	2.34951	2.35039	3.41111	2.88311	2.57387
ASMM10AP1B121289154V4	6.96826	6.66008	7.07384	6.61821	8.17601	8.36066	8.46754
ASMM10AP1B100186347V4	2.42774	2.37482	2.5778	2.35039	2.32254	2.40803	2.32205
ASMM10AP1B120232783V4	8.53349	8.38472	8.22093	9.08085	7.65863	7.44725	7.5445
ASMM10LNC1A100010160V4	7.36482	7.844	7.15607	7.47865	7.6244	7.88455	7.73503
ASMM10P010352V4	2.42774	2.76685	2.34951	2.35039	3.6202	3.28602	3.17057
ASMM10LNC1A100058632V4	2.42774	2.37482	2.34951	2.35039	2.72517	2.63639	2.50731
ASMM10LNC1A113336503V4	10.5189	9.43745	10.2991	9.70815	10.7578	10.5024	10.5138
ASMM10AP1B113315385V4	10.5564	10.4367	11.8323	9.0616	9.3389	9.3064	9.60046
ASMM10P019180V4	4.45297	4.93422	4.48105	4.80483	3.84308	5.02678	4.14698
ASMM10AP1B100131322V4	7.41977	6.73078	6.92794	7.60798	7.67693	7.6436	7.77823
ASMM10LNC1A100031623V4	6.99198	6.76562	6.9563	6.95214	6.60566	6.82599	6.72004
ASMM10UP544V4	5.39267	5.42029	5.33923	5.72117	4.38905	4.51759	4.65236
ASMM10LNC1A109626172V4	10.3217	11.2555	9.72257	9.39837	7.53116	7.73792	6.13148
ASMM10AP1B100139890V4	2.42774	2.37482	2.34951	2.35039	2.32254	2.3219	2.32205
ASMM10LNC1A104458148V4	14.3493	14.2435	14.6223	14.5108	11.7731	11.6507	11.1754
ASMM10AP1B100141803V4	13.7743	13.7873	12.9116	13.6689	12.8263	12.6388	12.6102
ASMM10LNC1A109136700V4	7.46145	7.60731	7.09527	7.04267	8.54309	8.31447	8.4295
ASMM10LNC1A104481831V4	6.50137	6.40888	6.66531	6.51803	6.62631	6.74621	5.88794
ASMM10LNC1A105764839V4	6.49035	6.84168	6.1199	5.54954	5.90034	5.71016	5.93009
ASMM10P045760V4	9.45577	9.13224	9.45266	9.48202	6.57144	6.73004	6.30826
ASMM10AP1B100065386V4	12.3924	12.5439	12.4189	11.7776	12.5582	12.5056	12.6967
ASMM10AP1B100110308V4	3.51644	2.37482	2.34951	3.51204	3.76512	2.76254	3.71413
ASMM10LNC1A106649787V4	6.15316	6.11348	6.00435	6.09746	6.46656	6.29042	6.02364
ASMM10LNC1A106303300V4	7.61283	7.35657	7.55019	7.43293	6.53456	6.61118	6.29705
ASMM10P041841V4	5.94931	6.34462	6.18643	5.93637	6.26146	6.31765	5.47755
ASMM10AP1B116608168V4	4.58631	4.53906	4.29464	4.75039	6.42834	5.87311	5.44253
ASMM10LNC1A112365735V4	7.0914	6.41553	6.54616	6.67671	5.85021	5.96655	5.87369
ASMM10LNC1A107484770V4	5.85021	5.67042	6.20853	5.52596	6.20625	6.57778	6.29606
ASMM10LNC1A104672627V4	7.40513	7.25002	7.37002	7.24662	8.03964	7.89626	7.26483
ASMM10AP1B103392145V4	12.7007	12.7368	12.935	11.9068	14.5835	14.6705	14.6752
ASMM10AP1B102664602V4	3.64312	3.40183	2.34951	2.79575	2.32254	2.3219	2.32205
ASMM10LNC1A100057951V4	5.70241	5.92792	5.71107	6.39557	6.63576	6.32677	5.9061
ASMM10LNC1A104039670V4	7.09315	7.09721	7.09413	7.46833	7.61672	7.39522	7.28177
ASMM10AP1B104080247V4	7.34678	7.06363	7.16156	7.41949	6.72472	6.836	6.67117
ASMM10AP1B102255042V4	9.81524	9.51532	9.69274	9.41925	10.883	11.0915	11.0074
ASMM10P042278V4	6.67085	8.65426	8.46806	6.53926	7.01131	7.0073	7.18056
ASMM10LNC1A114734403V4	7.02091	6.79794	6.83134	7.21936	8.02318	7.78166	7.79942
ASMM10AP1B100123134V4	6.40201	6.16013	6.43901	7.41455	6.29611	6.13757	6.48682
mouselincRNA1171-_P1V4	6.08215	5.6593	6.23171	5.93201	6.14738	6.13438	6.04251
ASMM10AP1B129737933V4	5.15793	4.47081	5.25126	5.12992	6.15197	5.87424	5.92344
ASMM10P018174V4	9.3432	10.0873	9.26745	9.4367	8.94018	8.54021	8.97345
ASMM10LNC1A116811864V4	8.63546	8.43437	8.66598	8.80118	8.97799	8.74402	8.88832
ASMM10P032679V4	6.43531	8.12214	7.95777	6.54889	6.31584	6.16413	6.39279
ASMM10AP1B100057938V4	5.80397	5.62452	5.4298	5.89435	7.18201	7.19438	7.11207
ASMM10LNC1A106652460V4	2.42774	2.37482	2.34951	2.35039	3.86269	2.44306	2.56606
ASMM10LNC1A100010945V4	2.42774	2.37482	2.70429	2.92283	2.32254	2.5182	2.32205
ASMM10LNC1A100058547V4	5.03248	4.61197	4.80536	4.94145	3.65755	4.04286	4.00895
ASMM10LNC1A107161038V4	8.26802	8.8727	8.52673	8.78315	4.32936	4.26398	3.60619
ASMM10LNC1A100021038V4	3.17429	2.37482	2.34951	3.75361	2.45587	2.3219	2.52213
ASMM10P028002V4	5.85219	5.90243	5.72483	5.57578	6.21716	6.23416	6.29065
ASMM10LNC1A106144794V4	4.69011	6.00308	4.57785	7.4835	4.84274	4.83803	4.70985
ASMM10LNC1A103441020V4	10.3062	10.2584	10.3655	10.6378	9.77454	9.68129	9.58616
ASMM10LNC1A110351595V4	5.64468	5.64535	5.57041	5.59663	4.65356	4.97797	5.10108
ASMM10LNC1A107191200V4	7.46319	7.13208	7.29314	7.24564	9.36126	9.5304	9.17621
ASMM10AP1B100174425V4	6.92761	6.48046	6.404	6.49657	7.26844	7.12879	7.20486
ASMM10P042885V4	4.669	4.81303	4.85017	4.87019	5.07131	5.07062	5.20477
ASMM10LNC1A101631428V4	7.91705	7.47058	7.64237	8.14853	9.98072	9.96758	9.94289
ASMM10P041992V4	6.28891	6.19771	6.37263	6.29596	6.75649	6.99275	7.12738
ASMM10AP1B100136226V4	5.65616	5.27593	5.40073	5.65117	6.28956	6.05005	6.2695
ASMM10AP1B100074022V4	9.06978	8.95213	9.02159	9.06605	8.88321	8.67376	8.67635
ASMM10LNC1A105165392V4	4.46573	4.22944	4.84591	4.56251	4.69928	5.07812	4.79436
ASMM10AP1B110099383V4	10.7729	10.6464	10.44	10.8165	9.6247	9.49135	9.43331
ASMM10LNC1A105957863V4	3.59775	2.37482	3.79278	3.28079	4.42583	2.97374	4.19758
ASMM10LNC1A112556047V4	7.63147	8.775	8.77023	7.97618	7.57869	7.32024	7.28937
ASMM10P051674V4	5.03208	4.83629	5.01079	5.12358	5.07656	5.04427	5.10896
ASMM10AP1B100101626V4	2.42774	2.37482	2.34951	3.12801	2.32254	2.3219	2.32205
ASMM10AP1B111603065V4	10.3483	10.3489	10.3698	9.34336	12.2655	12.8309	12.4409
ASMM10AP1B100121695V4	6.36359	5.51069	9.52269	7.08198	6.75124	5.67522	9.11633
ASMM10LNC1A115512084V4	6.64354	6.40185	6.21094	6.60969	6.61739	6.71681	6.80917
ASMM10LNC1A111958971V4	14.6179	14.383	14.5157	14.7526	12.9285	12.7913	12.8214
ASMM10LNC1A105840087V4	5.54913	5.29393	5.36049	5.58607	5.45569	5.52202	5.2831
ASMM10AP1B113831252V4	8.28957	7.81043	8.05325	8.25663	8.34473	8.31905	8.17323
ASMM10P037769V4	6.31437	6.27284	6.14663	6.33692	7.19398	6.77497	7.02038
ASMM10AP1B102264857V4	4.81398	4.73506	4.77149	4.74169	6.41048	5.74295	5.5497
ASMM10AP1B119112907V4	7.38893	7.09053	7.07884	7.43037	7.57663	6.99625	7.45319
ASMM10AP1B100135037V4	5.57165	5.40176	5.74027	5.61833	5.33437	5.21897	5.43176
ASMM10LNC1A108875242V4	5.38207	5.32039	5.36137	5.05858	5.62421	5.27692	5.67242
ASMM10P057822V4	6.87038	6.67177	6.77936	6.96084	6.61788	6.64775	6.83009
ASMM10AP1B100383453V4	5.31197	4.96249	6.05193	5.14813	5.75096	5.27186	6.36601
ASMM10LNC1A100069082V4	7.63521	7.34702	7.47622	7.33841	8.87983	8.61033	8.61964
ASMM10LNC1A100967209V4	11.087	11.1336	11.0262	11.1001	10.4961	10.4674	10.5712
ASMM10LNC1A100047220V4	5.16662	5.14334	5.12658	5.30098	5.24707	5.11549	5.22832
ASMM10AP1B129594668V4	6.63065	6.48258	6.72288	6.71796	7.06697	7.05005	6.95169
ASMM10AP1B110233036V4	9.03695	8.64477	9.08713	8.64668	10.7992	11.1994	11.0115
ASMM10AP1B109059416V4	5.42943	5.38299	5.23636	5.35008	4.39616	3.50197	4.40178
ASMM10LNC1A108876151V4	11.1994	11.2643	11.4578	12.6734	12.1778	12.2922	12.3338
ASMM10LNC1A111142761V4	3.70944	4.05549	4.2016	3.95428	5.01987	4.69488	4.6403
ASMM10LNC1A116196315V4	5.20278	4.93158	4.61188	5.13105	4.07892	4.2797	5.14564
ASMM10LNC1A103244920V4	5.27528	4.88936	5.01103	4.29913	4.18978	4.09009	4.25185
ASMM10AP1B119453695V4	4.35658	3.42487	3.78012	4.10142	3.90568	3.69984	4.24059
ASMM10P019431V4	12.4409	12.8818	12.3354	12.6154	7.63781	7.27483	7.51651
ASMM10AP1B100159807V4	2.42774	3.53084	3.09472	3.40308	3.16605	2.67459	2.33303
ASMM10LNC1A109642753V4	6.41868	6.56504	6.47061	6.51842	7.11955	6.9654	6.84215
ASMM10AP1B100073922V4	6.71129	6.57493	6.82209	6.65557	5.35205	5.33479	5.26647
ASMM10AP1B111759053V4	9.7113	9.83314	9.60367	9.85063	9.10427	8.97206	8.97831
ASMM10AP1B110800466V4	11.097	10.6392	10.9013	11.0725	11.4711	11.5864	11.4601
ASMM10LNC1A100395027V4	9.36652	9.01942	9.43638	9.51241	8.99067	8.83132	8.96002
ASMM10AP1B123500874V4	5.3383	5.23812	4.99266	4.78071	7.01495	6.95334	6.91765
ASMM10LNC1A105136290V4	5.72529	5.50635	5.50608	5.5198	5.96443	5.56698	6.00661
ASMM10LNC1A103638335V4	4.54971	5.28186	5.4181	5.52154	5.9081	5.70172	6.09031
ASMM10LNC1A100084375V4	16.1024	16.297	16.2628	16.2881	15.071	15.0292	15.1132
ASMM10P019319V4	10.1596	10.1457	10.1927	10.1317	11.0711	10.9646	11.3452
ASMM10P024543V4	5.45077	5.63713	5.77562	5.08946	4.53269	4.33418	4.64692
ASMM10P015488V4	8.31422	8.77512	8.04215	8.35733	7.68286	7.65922	8.05615
ASMM10AP1B106542478V4	6.38767	6.09854	6.40236	6.13373	6.44725	6.35205	6.60006
ASMM10LNC1A102425049V4	3.67459	3.76378	3.85539	3.89335	5.18296	4.83225	5.35136
ASMM10LNC1A103161353V4	10.0664	10.5509	10.4638	10.7253	11.3116	11.2045	11.6713
ASMM10LNC1A100005474V4	7.50747	7.38391	7.53682	7.5409	8.17546	7.95854	7.85092
ASMM10AP1B125539271V4	11.1046	10.6406	10.5103	10.2464	11.1599	11.2968	10.8749
ASMM10UP237V4	5.38129	5.26353	5.17081	5.27019	5.49495	5.3451	5.15104
ASMM10AP1B100244064V4	7.68978	6.70205	6.81262	7.45347	9.34555	8.59586	8.46806
ASMM10LNC1A107258648V4	5.21161	5.23277	4.82832	5.03282	5.04766	5.00139	4.96805
ASMM10P015950V4	8.76768	8.96895	8.82448	9.78748	8.96029	8.79389	9.02965
ASMM10LNC1A100052571V4	8.99931	8.81161	8.80822	9.10681	9.52927	9.24433	9.20168
ASMM10LNC1A101294938V4	9.38321	9.33187	9.33902	9.60757	8.16863	8.0831	8.07644
ASMM10LNC1A100121500V4	5.39766	5.56675	5.38319	5.71355	4.04037	3.79869	4.45911
ASMM10P018162V4	4.28332	4.74034	4.33932	4.22814	2.80261	3.5454	4.12268
ASMM10AP1B100007909V4	5.40694	5.32151	5.47797	5.14172	4.36465	4.81817	5.05377
ASMM10LNC1A102119778V4	5.87493	5.84236	6.11846	5.80325	6.14285	6.13065	6.52548
ASMM10AP1B100190651V4	7.92468	7.89376	7.6305	7.98266	8.78513	8.48283	8.97933
ASMM10AP1B100159133V4	3.7572	2.37482	4.34896	4.20147	2.32254	2.50331	2.80636
ASMM10P018076V4	6.07935	5.53249	5.64547	6.34691	6.42091	6.29392	6.32328
ASMM10LNC1A105599995V4	7.26387	7.13501	7.53793	7.32233	6.60195	6.49948	6.64021
ASMM10LNC1A100032090V4	7.68963	7.58323	7.5335	7.95418	7.83517	7.71111	7.89383
ASMM10AP1B106390090V4	10.5278	11.106	9.82539	9.75617	7.15092	7.55832	5.96725
ASMM10LNC1A100024822V4	7.42543	5.32369	5.3126	5.75407	5.4113	4.99066	5.58327
ASMM10AP1B112780913V4	5.89692	5.65326	6.09003	6.71341	6.51398	6.26892	6.68539
ASMM10AP1B107206734V4	2.42774	2.67387	3.62716	2.35039	2.32254	2.41345	2.60955
ASMM10P016190V4	7.05996	7.01283	6.97698	7.05996	6.61367	6.39065	6.58911
ASMM10UP267V4	7.62972	7.69509	7.67323	7.83081	7.09343	7.23185	7.19529
ASMM10AP1B116659958V4	6.30241	6.06446	6.44934	6.26887	2.37666	2.3219	2.38589
ASMM10AP1B100143561V4	5.94239	5.3542	5.37243	5.71947	5.00713	4.66727	5.24131
ASMM10AP1B108326074V4	8.26009	7.79116	8.32827	8.44831	9.61073	9.99512	10.0252
ASMM10AP1B123997367V4	6.57176	6.58639	6.52582	6.57539	6.30762	6.20808	6.24408
ASMM10AP1B120354289V4	5.46441	5.44728	5.39008	5.32997	5.15793	4.95776	5.58946
ASMM10AP1B125618861V4	6.89996	6.68341	6.62722	6.90004	6.60051	6.33312	6.55071
ASMM10P022643V4	2.96031	4.70399	4.77368	4.24296	3.60187	4.01135	4.44144
ASMM10LNC1A102651370V4	9.57077	9.42799	9.32926	9.49064	7.73942	7.66647	7.74986
ASMM10AP1B109457152V4	7.20747	6.62986	6.29295	6.02045	5.0401	5.81607	5.54581
ASMM10LNC1A102102264V4	7.77611	8.174	7.32463	8.33376	8.58893	8.45073	8.44085
ASMM10AP1B100185718V4	10.0192	9.83217	9.71802	9.36881	10.654	10.7278	11.1317
ASMM10AP1B100084680V4	7.56243	7.61562	7.42265	8.40946	6.52421	6.68119	6.92205
ASMM10LNC1A100015058V4	13.1555	13.1191	13.478	13.5054	11.1596	11.018	11.2457
ASMM10LNC1A107676668V4	7.50932	7.4998	7.17311	7.70396	7.47831	7.21785	7.52918
ASMM10AP1B106689889V4	8.36124	7.84742	7.83792	8.2588	8.14144	7.92497	8.45409
ASMM10LNC1A103971220V4	8.00003	7.411	7.92022	7.93111	8.73271	8.85024	8.71877
ASMM10AP1B122219246V4	6.34624	6.1527	6.12791	6.13141	6.82961	7.01464	6.92652
ASMM10AP1B106283296V4	4.57906	4.7078	4.66641	4.50899	5.9564	5.88115	5.8938
ASMM10AP1B114574417V4	6.46075	6.33025	6.6778	6.53495	6.17051	6.2011	6.53737
ASMM10LNC1A107666429V4	6.4324	5.82337	6.16249	6.89972	4.88658	5.15364	5.52202
ASMM10LNC1A103645078V4	10.5085	10.6075	10.546	10.7193	9.69408	9.60967	9.67611
ASMM10LNC1A100073951V4	6.66127	6.78336	6.46083	7.01914	6.82948	6.53104	6.73947
ASMM10AP1B106938780V4	4.71359	4.62566	4.75058	5.06369	4.08289	4.80994	4.71693
ASMM10LNC1A102344788V4	7.07676	6.87359	6.82871	7.74374	8.30059	8.78146	8.60928
ASMM10LNC1A100063878V4	3.91566	3.45206	3.54844	3.01465	3.77157	3.10178	3.36514
ASMM10P011460V4	8.91849	8.8967	8.81338	9.91081	8.65869	8.46155	8.56784
ASMM10LNC1A100104559V4	8.83717	8.41106	9.28051	8.88014	7.72112	7.69491	7.99802
ASMM10UP151V4	2.42774	2.37482	2.82065	2.35039	2.32254	2.3219	2.32205
mouselincRNA0513+_P1V4	12.5607	12.4394	12.5151	12.772	12.8921	12.7919	12.8227
ASMM10LNC1A101645452V4	6.596	6.35737	6.69253	6.93754	7.02279	7.02376	6.96213
ASMM10LNC1A116813665V4	9.50995	9.161	9.11808	9.52482	7.87773	7.92447	7.85106
ASMM10LNC1A100101218V4	8.38531	7.74453	8.14782	8.38629	5.47958	6.00111	5.70924
ASMM10AP1B116625057V4	10.8047	10.6425	11.1336	10.2513	4.99959	5.41186	5.43499
ASMM10AP1B113078192V4	9.26352	9.23697	9.42216	8.71912	9.2669	9.23653	9.36225
ASMM10LNC1A110680284V4	7.55581	7.7261	8.04022	7.63746	7.32935	7.51032	6.966
ASMM10LNC1A110676679V4	7.09268	7.61808	7.51578	7.12425	7.63116	7.50434	7.48645
humanlincRNA2250-_P1V4	2.42774	2.37482	2.34951	2.35039	2.32254	2.35679	2.32205
ASMM10AP1B109085597V4	6.16301	6.061	6.02633	6.14391	6.59117	6.65811	6.59074
ASMM10LNC1A109800262V4	7.45559	7.30578	7.33657	7.56642	7.24455	7.52783	7.25182
ASMM10AP1B112299823V4	5.66062	5.70522	5.67139	5.67305	3.84754	3.92888	4.08152
ASMM10AP1B100102885V4	12.5833	12.3543	12.3629	12.6472	11.4389	11.3139	11.0742
ASMM10LNC1A111845936V4	8.45965	8.5712	8.35733	8.56997	8.32847	8.48274	8.07105
ASMM10LNC1A100134138V4	4.19036	4.15621	4.53009	4.37766	4.92623	5.27019	4.9401
ASMM10AP1B102795528V4	3.9337	4.67733	3.84975	3.50444	5.85576	5.82001	5.53462
ASMM10LNC1A100183341V4	5.80893	5.81318	5.26159	5.41206	6.39306	6.20183	6.19189
ASMM10LNC1A100052573V4	4.54737	4.40958	4.5095	4.40558	4.15806	4.69948	2.88843
ASMM10AP1B107847634V4	9.44098	9.31379	9.30478	9.51831	9.03876	9.00105	8.93566
ASMM10LNC1A114996258V4	7.15049	7.62898	6.99428	7.69228	6.43408	6.35748	6.43976
ASMM10AP1B106908839V4	7.32627	7.10981	7.34726	7.28306	8.45518	8.2973	8.29019
ASMM10LNC1A116965016V4	8.68845	8.34079	8.85444	8.81026	8.50273	8.66938	8.38553
ASMM10AP1B112941007V4	5.07613	4.57054	4.50405	5.27871	5.43952	5.52363	4.79607
ASMM10P050509V4	4.5882	4.97797	5.04866	4.7319	4.51034	4.64675	3.42378
ASMM10P032744V4	16.7724	16.842	16.7457	16.842	16.3345	16.3471	16.3639
ASMM10AP1B101590943V4	6.04928	5.88864	6.09665	5.97184	6.1527	6.32596	5.87184
ASMM10LNC1A107128038V4	6.64296	6.34815	6.3773	6.41285	6.82756	6.76983	6.05624
ASMM10P043668V4	2.42774	2.37482	2.72774	3.1863	2.37465	2.35662	2.38377
ASMM10P041664V4	8.78701	8.96869	8.84963	9.31558	7.95567	8.15847	7.69701
ASMM10P051530V4	8.66108	8.42629	8.36426	8.89176	8.61443	8.36855	7.94092
ASMM10P027325V4	5.4783	5.29306	6.08796	5.98983	4.55121	4.58807	4.50293
mouselincRNA1637-_P1V4	2.42774	2.37482	2.34951	2.35039	3.59525	2.88757	2.55011
ASMM10LNC1A100145258V4	6.56071	6.63213	6.53391	6.24592	5.89986	5.75116	6.12745
ASMM10P058074V4	11.2555	10.7558	10.6814	11.8825	12.3537	12.3386	12.1863
ASMM10P029633V4	9.80235	9.43237	9.80204	9.9818	9.32615	9.5768	9.58788
ASMM10P025239V4	6.02964	5.78028	6.08541	6.6354	6.85939	7.0319	6.97535
ASMM10AP1B108305142V4	5.71369	5.41507	5.78759	5.90988	5.8085	6.08557	5.93252
ASMM10AP1B118278759V4	9.04935	8.80764	9.16206	9.02181	8.91449	8.78824	8.64945
ASMM10AP1B127142714V4	5.34686	5.40524	5.39761	4.79805	5.54113	6.16894	5.83909
ASMM10P057941V4	9.27329	9.40165	9.0974	9.1879	6.0831	6.15689	5.89475
ASMM10AP1B100196692V4	7.37716	7.36756	7.6965	7.5495	7.9402	7.92203	8.26761
ASMM10LNC1A100073238V4	6.94569	7.11733	6.83897	6.91027	7.11587	6.75521	6.99791
ASMM10LNC1A100044610V4	4.39447	5.00093	5.11619	5.15673	5.92929	5.50548	5.6087
ASMM10LNC1A100058413V4	7.7364	7.37983	7.50041	7.83004	6.75721	6.67421	6.56801
ASMM10AP1B103992864V4	6.76445	6.29645	6.86208	6.77581	5.88121	6.26186	6.3724
ASMM10LNC1A103507209V4	12.0578	11.3535	11.2167	11.9808	10.7974	10.3286	10.4346
ASMM10AP1B100185459V4	5.34471	4.95244	6.4227	2.75286	5.906	6.49314	7.07491
ASMM10LNC1A100639694V4	5.97997	6.24723	6.00049	5.52319	7.49852	7.4964	7.67616
ASMM10AP1B100095899V4	8.24864	8.28542	8.16222	8.28276	8.60497	8.8926	8.68057
ASMM10LNC1A100026379V4	5.11942	5.00139	4.9181	5.10867	3.24352	4.2397	4.25225
ASMM10AP1B101453833V4	5.65706	5.82141	5.60699	5.52657	5.39082	5.54998	5.59704
ASMM10LNC1A111940839V4	6.98734	6.93716	6.81306	7.38155	7.33287	7.13546	7.07752
ASMM10AP1B109315484V4	5.24519	5.2005	5.68259	5.39347	5.47116	5.52585	5.88487
ASMM10LNC1A108201249V4	11.066	10.5011	10.6748	11.0963	10.6075	10.6705	10.5982
ASMM10P045920V4	6.72265	6.44121	6.6518	6.71265	6.41031	6.49407	6.43214
ASMM10LNC1A100005478V4	9.33074	9.27898	9.20898	9.62772	8.37905	8.27142	8.28957
ASMM10AP1B118576087V4	4.93422	4.5295	4.76371	4.73496	5.69853	5.65813	5.82894
ASMM10AP1B106542269V4	6.37357	6.34707	5.78996	6.10505	5.7397	5.36381	5.48246
ASMM10LNC1A100015613V4	11.4604	11.312	11.2984	11.3964	10.2033	9.90513	9.87879
ASMM10LNC1A109636375V4	8.6059	8.48943	8.44452	8.60318	7.38651	7.37056	7.16665
ASMM10LNC1A104708938V4	5.44786	5.3714	5.14182	6.25269	6.21051	6.05581	6.2772
ASMM10AP1B115975989V4	8.392	7.842	7.71408	9.50791	8.79508	8.92235	8.66083
ASMM10LNC1A100079787V4	2.42774	2.37482	2.34951	2.35039	2.32254	2.3219	2.32205
ASMM10LNC1A100101068V4	5.83219	5.70883	6.03273	5.34839	5.18306	5.25736	5.16792
ASMM10LNC1A100100793V4	6.84619	6.40064	6.85581	6.89719	7.59402	7.3189	7.52441
ASMM10AP1B102101202V4	7.94973	7.49595	7.35166	8.38189	8.6528	8.65426	8.69477
ASMM10AP1B118347042V4	9.86993	9.73874	9.70179	10.0977	9.8719	9.90927	9.8478
ASMM10P033208V4	2.42774	2.37482	2.34951	2.35039	4.23531	3.15905	3.12967
ASMM10LNC1A109478443V4	6.11161	5.85505	6.12126	6.04385	6.66496	6.65244	6.82943
ASMM10LNC1A100026605V4	9.20266	9.3032	9.28012	9.09652	7.15432	7.21929	7.45365
ASMM10LNC1A100026811V4	5.73774	5.76346	5.37342	5.88528	6.60203	6.55746	6.34227
ASMM10LNC1A100011613V4	13.064	12.6768	12.7007	13.0968	12.4315	11.8974	11.8727
ASMM10UP023V4	6.13148	6.0178	6.17131	6.2556	6.43106	6.19079	6.38095
ASMM10AP1B110026331V4	6.64513	6.43677	6.41436	6.79075	7.26041	7.08372	7.26512
ASMM10AP1B102120847V4	9.47064	9.84542	9.82999	9.43049	9.40091	9.24376	9.4658
ASMM10P046129V4	2.42774	2.37482	2.34951	2.35039	4.87082	4.14469	4.11445
ASMM10AP1B115869325V4	9.70815	9.61106	9.68321	9.61721	8.17456	8.06342	8.20248
ASMM10LNC1A100615124V4	3.54844	3.37512	3.28669	3.13848	3.83951	2.3219	3.6949
ASMM10AP1B100079459V4	10.331	10.5192	10.3874	10.396	10.4565	10.3601	10.5225
ASMM10AP1B113767295V4	10.8393	10.5374	10.6572	10.101	12.4374	12.6039	12.6003
ASMM10LNC1A100647031V4	5.38746	5.38621	5.5502	5.53462	5.16811	5.269	5.60356
ASMM10P030873V4	3.01465	3.41316	3.34558	2.77738	4.11695	3.31252	3.02829
ASMM10P052073V4	5.65451	5.27864	5.73641	5.51145	5.99741	6.65827	6.55311
ASMM10LNC1A100839169V4	4.73893	5.01518	4.85753	4.73147	5.81353	5.585	5.59935
ASMM10AP1B111294997V4	7.11398	7.12899	7.0469	7.09361	6.09665	6.43474	6.0837
ASMM10P047152V4	3.109	3.57166	2.60737	2.35039	2.45049	2.43486	2.49461
ASMM10AP1B117002716V4	6.77189	6.95536	6.71161	7.04718	6.41394	6.08066	6.32644
ASMM10P018203V4	8.12153	7.89036	8.05419	8.55871	7.33449	7.2996	7.89357
ASMM10LNC1A100111126V4	6.82197	7.09246	7.16915	6.54311	6.3992	6.26463	6.27138
ASMM10LNC1A100079819V4	2.42774	2.37482	2.34951	2.70616	2.32254	2.3219	2.32205
ASMM10LNC1A106478552V4	11.8007	11.4455	11.4284	11.4462	11.6066	11.3675	11.4936
ASMM10AP1B100035869V4	3.50508	3.49286	3.75587	3.92908	3.78316	2.94433	3.42716
ASMM10LNC1A113949874V4	9.20168	9.02053	9.42254	8.56251	11.1457	11.2884	11.1641
ASMM10P032200V4	7.6709	8.00764	7.73383	8.17001	8.47779	8.45537	8.66806
ASMM10LNC1A100060542V4	11.9805	11.7782	11.8782	11.7508	13.2568	13.2818	13.6305
ASMM10P028492V4	3.88153	3.40527	3.52577	3.44907	3.45802	2.49138	4.01404
ASMM10LNC1A100105750V4	3.66817	3.65239	3.25634	3.18723	2.32254	2.3219	2.32205
ASMM10LNC1A112506869V4	5.07962	4.85237	4.88612	4.54641	4.82129	5.18482	5.52011
ASMM10UP619V4	6.54714	6.33866	6.44275	6.4422	5.80439	5.92792	6.03529
ASMM10AP1B109290946V4	3.76794	3.50247	3.81843	3.06052	2.5467	2.3219	2.51123
ASMM10P013629V4	13.6967	13.7244	13.5287	13.6355	12.7043	12.4466	12.5278
ASMM10AP1B104221217V4	8.65105	8.20708	10.32	7.10494	10.3169	10.701	10.863
ASMM10LNC1A113070422V4	6.4106	6.48967	6.14697	6.53628	7.28335	7.24557	7.48148
ASMM10LNC1A107298106V4	4.8304	5.83815	5.55616	5.49959	5.81187	5.8452	5.74344
ASMM10P046685V4	7.15526	7.672	6.91981	6.9437	7.98184	7.10627	7.65565
ASMM10AP1B100052771V4	10.0783	9.91043	9.85657	9.7143	11.2872	11.2122	11.4568
ASMM10AP1B117014452V4	2.42774	2.37482	2.34951	2.35039	3.10823	3.15478	2.61301
ASMM10P011334V4	2.42774	2.37482	2.34951	2.35039	2.90828	3.12308	2.77381
ASMM10LNC1A108488991V4	3.60929	3.31444	4.39333	3.47235	4.64073	3.90772	4.70789
ASMM10LNC1A100006858V4	4.99483	5.22881	4.99779	5.30156	5.21393	5.09228	5.07584
ASMM10LNC1A105853001V4	6.2229	6.15384	6.06247	6.15689	6.22174	6.49172	6.32932
ASMM10AP1B107325792V4	8.10534	8.37196	8.26134	8.74606	8.10167	8.19565	8.26255
ASMM10AP1B119412726V4	6.86594	6.69814	6.64881	6.7343	7.36897	7.19564	7.28496
ASMM10UP045V4	2.42774	2.37482	2.68171	2.35039	2.32254	2.3219	2.32205
ASMM10AP1B105333948V4	6.06236	5.79369	5.73677	6.08485	6.00869	5.59994	5.95794
ASMM10LNC1A100162948V4	4.70292	5.04021	4.76356	5.05262	4.52171	4.72865	4.68314
ASMM10AP1B100033340V4	11.3507	11.3073	11.8604	10.7558	12.0823	12.0211	12.3886
ASMM10P050131V4	6.44926	6.23171	6.17555	6.10251	6.50887	5.92286	6.19244
ASMM10LNC1A106663870V4	3.81515	3.22843	3.90622	2.9367	2.32254	2.3219	2.32205
ASMM10AP1B111800574V4	8.21566	7.46847	7.74743	6.97643	8.58804	9.02393	8.87079
ASMM10LNC1A109514235V4	8.54597	8.22093	8.2843	8.68411	8.27065	7.81818	7.94887
ASMM10LNC1A105638110V4	7.3288	7.18842	7.40498	7.52645	6.98932	7.02863	6.95039
ASMM10LNC1A100047986V4	6.16249	6.02004	6.18055	6.34036	6.04739	6.2402	6.20384
ASMM10LNC1A100026595V4	3.19367	3.08428	3.14044	3.34129	3.84825	4.06591	3.99977
ASMM10UP308V4	5.28989	5.27712	5.72679	5.40176	5.40864	5.40524	5.58814
ASMM10AP1B100930078V4	6.98208	6.54385	6.85443	7.454	6.85918	6.27342	6.60785
ASMM10LNC1A109727599V4	8.18055	7.91174	8.12172	7.8061	8.55781	8.54309	8.65426
ASMM10AP1B100057731V4	2.42774	3.33734	3.61707	2.35039	2.32254	2.3219	2.32205
ASMM10LNC1A110215775V4	2.97159	2.37482	3.02882	2.95429	3.11973	3.22798	3.05463
ASMM10LNC1A100111508V4	8.38017	9.79693	8.1984	8.32283	10.4949	11.5422	10.7093
ASMM10AP1B100149750V4	9.21453	9.37581	9.07397	8.32446	10.7713	11.11	11.1798
ASMM10LNC1A114988629V4	5.43186	5.24088	5.36691	5.605	4.67633	5.37478	4.97291
ASMM10P025767V4	7.26589	7.75736	7.19777	6.74632	7.33565	7.10764	7.33713
ASMM10LNC1A100081736V4	3.51156	4.12693	3.19233	4.11703	3.60868	4.33216	4.20828
ASMM10LNC1A113618493V4	2.42774	2.37482	2.34951	3.41205	3.63141	4.11328	3.66423
ASMM10LNC1A111948789V4	10.3165	10.296	10.2273	10.3277	9.05468	9.01056	9.2772
ASMM10LNC1A100899343V4	8.38112	8.12926	8.88286	7.74926	10.5837	10.7409	10.6254
ASMM10AP1B117110627V4	6.57679	6.62279	6.5465	7.02529	6.53551	6.38348	6.74005
ASMM10LNC1A100127583V4	7.19133	8.684	7.80562	6.70607	7.52742	7.4439	7.63013
ASMM10LNC1A100042242V4	12.431	12.5887	12.542	12.6845	10.4233	10.2684	10.4441
ASMM10P021555V4	6.25295	6.12888	6.44883	5.96942	9.04361	6.70578	10.0558
ASMM10LNC1A113556299V4	4.92772	4.8848	4.73053	4.80463	2.32254	2.3219	3.27832
ASMM10LNC1A100628764V4	6.22967	6.13611	6.29065	6.43949	5.76854	6.16527	6.21198
ASMM10LNC1A113319299V4	7.5946	6.59275	7.66516	8.00067	7.33308	7.55423	7.50041
humanlincRNA0814-_P1V4	2.42774	2.37482	2.34951	2.35039	2.32254	2.3219	2.32205
ASMM10P050823V4	12.0545	11.8014	12.3222	12.6715	13.1167	13.0222	13.2338
ASMM10LNC1A102151673V4	3.85599	3.68544	3.95251	4.58516	3.52478	4.29464	4.40272
ASMM10LNC1A110016738V4	7.75887	7.61173	7.454	7.85131	7.61528	7.70627	7.90556
ASMM10LNC1A108523160V4	11.5432	11.4219	11.6149	11.6744	11.2917	11.6186	11.563
ASMM10LNC1A100074026V4	6.3695	8.39087	8.25387	5.95341	4.03965	3.84442	3.17276
ASMM10LNC1A114717543V4	12.5439	11.8498	11.7171	11.7466	12.3186	12.2878	12.2423
ASMM10P019257V4	11.2437	11.391	11.0874	11.425	10.0472	9.7331	9.80717
ASMM10LNC1A111648780V4	2.42774	2.37482	3.00792	2.54754	4.99571	4.8241	4.91532
ASMM10P058143V4	6.72288	6.41815	6.65765	6.92035	7.01612	7.34241	7.01547
ASMM10AP1B105774970V4	3.40382	3.02413	3.725	4.13036	3.64931	3.32037	2.48113
ASMM10AP1B102791598V4	6.98109	7.06921	6.73974	7.12204	6.73767	6.7541	6.64528
ASMM10AP1B100037882V4	2.92302	2.37482	2.34951	2.35039	2.32254	2.61043	3.0609
ASMM10LNC1A106892269V4	7.64493	6.88491	7.11611	7.98308	8.1711	8.08646	8.0388
ASMM10AP1B109355827V4	6.89954	8.90693	8.63137	6.8724	5.60115	6.20505	5.96857
ASMM10P027279V4	5.95571	6.27475	5.96684	6.29414	3.91876	4.74493	4.4885
ASMM10LNC1A101154398V4	7.88806	7.85272	7.85809	7.96698	8.483	8.4596	8.17785
ASMM10AP1B100169091V4	2.42774	2.37482	2.34951	2.35039	2.32254	2.3219	2.32205
ASMM10LNC1A113192718V4	7.15484	8.04288	7.78247	7.14758	5.8452	5.99002	5.71557
ASMM10P026191V4	2.42774	2.37482	2.34951	2.35039	2.66061	2.68894	2.4696
ASMM10LNC1A100015947V4	8.23652	7.8577	7.82284	8.30326	7.66565	7.59551	7.60008
ASMM10LNC1A106338573V4	7.2886	5.75643	7.2042	7.14153	7.55148	7.45034	7.38775
ASMM10P023717V4	7.08084	7.57231	6.67199	7.33097	7.85668	8.15198	7.80322
ASMM10AP1B129552855V4	4.92309	4.54431	4.84819	4.69398	5.68288	5.9832	5.3736
ASMM10LNC1A101644658V4	3.6605	4.15309	4.34782	3.62835	3.35935	4.05818	2.59811
ASMM10LNC1A106627395V4	4.08176	4.42993	4.51573	4.4877	4.43611	4.93957	3.9178
ASMM10LNC1A100078108V4	6.00372	6.00661	5.68305	6.98715	5.75764	5.53995	5.21413
ASMM10LNC1A110045742V4	6.87359	6.68559	6.71023	6.57144	7.01384	7.03863	6.47024
ASMM10AP1B107573705V4	11.0486	10.9752	10.8347	11.0273	11.8825	11.946	11.9473
ASMM10P029040V4	7.61306	7.83827	7.35773	7.73418	6.92794	6.87839	6.55465
ASMM10LNC1A111045044V4	6.5733	6.76185	5.20491	6.65357	6.66665	6.92366	6.56016
humanlincRNA1545-_P1V4	4.99747	4.38567	4.83283	4.68262	2.88215	3.58053	3.27197
ASMM10AP1B105930365V4	4.8091	4.40495	4.69103	4.76698	4.94136	4.98217	4.73853
ASMM10LNC1A105196723V4	7.59945	7.44492	7.57148	7.59811	8.00511	8.01412	8.22968
ASMM10UP863V4	4.15998	4.5712	4.35541	4.45221	4.44774	3.60218	3.79894
ASMM10LNC1A100141425V4	5.36166	5.07697	4.97885	5.6683	6.6381	6.59455	6.44322
ASMM10AP1B117985095V4	8.55434	8.41727	8.57694	8.54815	8.27709	8.41733	7.89634
ASMM10UP677V4	5.80639	5.53127	6.1742	5.79851	5.58308	5.11726	3.68252
ASMM10LNC1A103339047V4	9.69502	9.58348	9.76926	9.64924	8.97091	9.06118	8.9349
ASMM10P035105V4	2.42774	3.46256	3.9723	2.88803	2.32254	2.3219	2.5388
ASMM10AP1B125174354V4	5.19155	4.46496	4.40603	4.72178	6.56149	6.66559	6.76696
ASMM10AP1B108513056V4	3.32757	3.58343	3.50002	3.28437	5.85977	5.20438	5.59325
ASMM10AP1B107376039V4	3.71641	2.95815	3.85462	3.35551	3.36993	3.43188	2.99214
humanlincRNA0262+_P1V4	6.723	6.57359	6.5726	6.88188	7.74181	7.47648	7.45614
ASMM10LNC1A100333254V4	5.98365	5.91981	5.84017	5.8966	5.3407	5.4061	5.46096
ASMM10LNC1A100063593V4	5.21436	4.89253	5.06101	5.14084	3.82663	4.45986	4.03015
ASMM10LNC1A100117183V4	9.64571	9.45218	9.55601	9.69132	9.88814	9.72986	9.53752
ASMM10LNC1A101387500V4	8.77477	9.3846	9.1792	8.82019	8.1213	8.01063	8.10081
ASMM10LNC1A100022888V4	4.36741	3.72768	4.22531	4.13752	2.93604	3.79788	2.91348
ASMM10LNC1A100084408V4	5.55575	5.49827	5.37526	5.32151	5.15289	4.81562	5.40014
ASMM10LNC1A111313883V4	5.06826	5.54712	4.73847	4.89772	5.94847	5.57533	5.33923
ASMM10AP1B129330746V4	7.65839	6.95906	7.29254	7.34071	9.08961	9.03756	8.77437
ASMM10LNC1A109976954V4	6.07695	5.78713	5.96542	6.08043	6.50299	6.1527	6.49578
ASMM10LNC1A100063220V4	5.48584	5.46387	5.1664	5.26922	5.17819	5.53056	5.54388
ASMM10LNC1A107662978V4	8.69568	8.60853	8.63878	8.89275	9.13896	8.85587	9.05997
ASMM10AP1B113682381V4	6.32548	6.1662	6.44648	6.44075	5.65474	5.91236	5.99701
mouselincRNA0161+_P1V4	4.14213	3.70739	3.12263	3.86667	2.5908	2.3219	2.57084
ASMM10LNC1A100037399V4	3.4959	3.13784	3.60532	3.81776	4.23292	3.86581	3.87712
ASMM10AP1B102195800V4	7.2039	6.98779	6.98948	6.98143	7.763	7.91899	7.89686
ASMM10LNC1A100211207V4	5.77763	5.74556	5.21457	6.19959	5.64574	5.82777	5.64102
ASMM10P014357V4	6.10858	6.43049	5.94306	4.36336	7.01752	7.18508	7.16093
ASMM10LNC1A106740413V4	10.948	9.9319	10.1906	10.708	8.84865	8.72376	8.92013
ASMM10P034626V4	6.42879	6.57799	6.51024	6.13056	7.32435	7.31208	7.46564
ASMM10LNC1A104643832V4	4.30161	3.74585	3.67231	4.24525	4.82047	4.86147	4.39266
ASMM10P022080V4	7.68841	7.47622	7.67548	7.8984	7.34062	7.16244	7.3163
ASMM10LNC1A100319944V4	11.7429	11.732	11.7007	11.9949	10.1488	10.0744	9.98887
ASMM10LNC1A100316660V4	5.7784	5.65149	5.27879	5.98698	3.95145	4.46784	4.51272
humanlincRNA1278-_P1V4	5.13311	5.55348	5.25977	5.28989	4.47858	3.92622	4.12641
ASMM10P040902V4	5.44162	5.77473	5.36714	6.12932	6.62619	5.88864	5.93545
ASMM10AP1B112711528V4	7.80951	6.82756	7.21565	7.6593	8.35684	8.16827	8.05978
ASMM10LNC1A101145841V4	6.15909	6.18434	5.9795	5.91522	5.64736	5.49113	5.22534
humanlincRNA1050+_P1V4	10.8949	10.6619	10.7064	10.9251	10.8218	10.4789	10.3769
ASMM10AP1B104726602V4	11.03	10.8282	11.0164	11.1503	12.7523	12.6502	12.7305
ASMM10AP1B103665983V4	7.50231	6.82242	6.93521	7.29498	7.65157	7.80741	7.85315
ASMM10P020308V4	9.70326	9.50519	10.2223	9.90003	11.2687	11.0623	11.0676
ASMM10AP1B108946204V4	8.80091	8.13135	8.76495	8.71324	9.05764	9.46175	9.42872
ASMM10LNC1A100047232V4	5.34866	5.72503	6.47476	5.45671	6.08576	6.17248	6.31532
ASMM10LNC1A105387041V4	7.00172	7.05061	6.87665	6.80981	6.3383	6.7826	6.79367
ASMM10LNC1A100037070V4	3.97885	3.57656	4.0368	3.63492	4.5753	3.6633	3.71492
ASMM10AP1B102258237V4	10.7492	10.5126	9.90282	10.4273	11.4481	11.4525	11.4141
ASMM10P028133V4	7.82331	7.61739	7.6745	7.69297	7.14635	6.52897	6.98648
ASMM10AP1B108608233V4	9.41241	9.08136	9.45232	9.28758	10.2084	10.3606	10.3684
ASMM10AP1B105540737V4	5.71659	5.3329	5.45831	5.75497	6.2088	5.69771	5.74729
ASMM10AP1B103201014V4	7.93677	8.27992	8.4085	8.06072	7.84799	7.83032	7.96161
ASMM10P021084V4	9.25194	8.99401	9.33937	9.48323	9.63124	9.55795	9.90089
ASMM10UP568V4	6.42099	6.76141	6.69345	6.56632	5.83628	5.71338	6.02057
ASMM10AP1B100041853V4	4.59636	4.3517	4.46024	4.20675	4.92243	4.54928	4.46774
ASMM10AP1B120493707V4	2.92025	2.37482	2.34951	2.99174	4.19997	3.75516	4.21262
ASMM10AP1B106673278V4	7.4636	7.63366	7.55702	7.59539	9.30976	9.62515	9.52927
ASMM10AP1B100115863V4	4.42152	4.85503	3.55772	3.90641	4.68767	4.10006	4.97268
humanlincRNA2182-_P1V4	6.25973	6.23629	6.42656	6.31748	6.79581	6.69977	6.7678
ASMM10LNC1A100047546V4	9.71742	10.1098	10.2193	10.1794	10.6668	10.3634	10.7343
ASMM10LNC1A100393759V4	13.1858	13.1503	13.5623	12.9256	14.055	14.1174	14.4508
ASMM10LNC1A100084563V4	4.17196	4.05843	3.67988	3.55863	2.32254	2.3219	2.32205
ASMM10AP1B100779255V4	8.77081	8.50248	8.90039	8.66793	10.5672	10.6315	10.675
ASMM10AP1B100093614V4	8.36691	8.32358	9.44892	6.21368	7.65706	8.12153	8.06837
ASMM10LNC1A111649129V4	5.83376	5.87961	5.63497	6.205	7.06933	6.75465	6.98323
humanlincRNA1193-_P1V4	5.78651	5.92546	5.65149	5.10188	5.00185	4.32582	4.81348
ASMM10AP1B100117672V4	6.71139	6.45063	6.53343	5.65668	7.39941	7.51001	7.84979
ASMM10LNC1A104286237V4	12.9191	12.675	12.9827	13.0672	13.5015	13.8491	13.8512
ASMM10LNC1A102578818V4	7.50259	7.23895	7.31496	7.52877	7.13501	6.98236	6.97692
ASMM10P029035V4	15.0175	15.2904	15.0277	15.1823	11.8037	11.7841	11.6892
ASMM10AP1B111503379V4	3.10534	2.98278	2.88942	2.83352	3.01609	3.53283	3.12781
ASMM10AP1B113029843V4	4.97075	4.64788	4.74662	4.4269	5.90378	5.60638	5.58847
ASMM10LNC1A100425208V4	7.53927	7.46928	7.59804	7.34477	7.54826	7.43046	7.63023
ASMM10LNC1A101614726V4	6.90921	6.93266	6.86783	7.03064	5.99605	5.84631	6.10957
ASMM10AP1B100093464V4	10.48	10.9792	10.2579	9.94564	11.0815	11.3904	10.8419
ASMM10AP1B112408293V4	5.63488	5.55757	5.1484	5.40195	6.10815	5.73356	6.32255
ASMM10LNC1A109321038V4	9.30239	9.42578	9.25049	9.4826	8.64792	8.42654	8.52883
ASMM10LNC1A105322934V4	2.42774	2.9411	2.55724	2.82346	3.84642	2.64381	3.78994
ASMM10AP1B105697907V4	9.91901	10.5362	9.22226	9.22258	7.40014	7.28832	7.01407
ASMM10P041304V4	7.06406	7.28177	7.09928	7.11582	5.95865	6.07378	6.27209
ASMM10AP1B108451614V4	6.70848	6.53598	6.53505	6.59275	6.1246	6.39285	6.4938
ASMM10LNC1A100909668V4	2.42774	3.19813	2.66986	2.58078	2.32254	2.3219	2.68251
ASMM10LNC1A100127120V4	5.83489	5.4883	5.25302	5.69493	3.14669	2.78699	3.0371
ASMM10AP1B121655985V4	8.1909	8.088	8.05938	8.21834	6.62648	6.28087	6.55366
ASMM10LNC1A111157440V4	8.38841	8.11399	8.05831	8.51584	8.554	8.23086	8.09307
ASMM10AP1B106747291V4	9.63625	9.33902	9.691	9.18946	10.7398	10.9343	11.0237
ASMM10LNC1A114955050V4	5.91279	5.67434	5.70153	6.1957	7.00849	6.36537	6.59242
ASMM10LNC1A100111646V4	4.54492	4.43631	5.08594	5.01257	3.35893	4.06165	4.4101
ASMM10LNC1A100100238V4	2.42774	2.37482	2.34951	2.35039	2.32254	2.3219	2.32205
ASMM10AP1B105276684V4	9.13185	9.09534	9.15871	9.9232	9.17791	9.20993	9.23606
ASMM10LNC1A100111778V4	5.9922	6.29573	6.06045	5.93474	5.53225	5.76797	6.20324
ASMM10LNC1A106682526V4	2.908	2.79447	2.66884	2.35039	2.32254	2.3219	2.32205
ASMM10P040388V4	6.12906	6.43069	6.71256	6.41713	6.12914	6.25064	6.74753
ASMM10AP1B105604653V4	8.86682	8.99652	8.90785	9.07685	7.82817	7.6905	7.93975
ASMM10LNC1A114638413V4	4.98702	5.13355	4.96343	5.1797	5.76597	6.32577	5.98799
ASMM10P042108V4	6.00608	6.08596	6.09334	6.23777	4.79284	4.69631	4.87415
ASMM10AP1B112873415V4	8.76513	8.66152	8.47711	9.34274	8.264	8.76074	8.68592
ASMM10AP1B108132743V4	3.92652	4.26142	3.99137	4.15586	4.6174	4.66294	4.36327
ASMM10LNC1A110513805V4	4.11946	3.68228	4.2823	3.96436	4.67156	4.38103	4.905
ASMM10LNC1A105512200V4	4.36	2.37482	3.25183	2.35039	2.32254	2.61774	2.32205
ASMM10AP1B120805693V4	6.38059	6.18039	6.28333	6.60605	6.89382	6.62974	6.80004
ASMM10LNC1A112809552V4	2.42774	2.37482	2.34951	2.35039	3.14813	2.40554	2.6369
ASMM10LNC1A100116298V4	5.88435	6.08534	5.95308	5.91981	4.66398	5.23287	4.97339
ASMM10LNC1A100106137V4	10.0836	10.0224	10.1895	10.1615	8.94568	8.80364	9.07625
ASMM10LNC1A110142108V4	3.13077	2.94592	2.5508	2.35039	3.30676	4.19368	4.16882
ASMM10AP1B113003097V4	2.42774	3.48885	2.73153	2.9288	4.05744	3.57591	3.75453
ASMM10AP1B100193536V4	6.04984	8.19951	8.15545	6.66365	5.73929	5.86188	5.8344
ASMM10AP1B118010821V4	8.89693	8.9266	9.35932	9.23909	9.13288	9.07008	9.36101
ASMM10LNC1A109175518V4	4.05344	4.4589	4.11695	4.06343	3.85923	4.04714	4.2543
ASMM10LNC1A104542130V4	8.90519	8.81176	9.04822	9.07391	8.47648	8.45473	8.761
ASMM10AP1B103729322V4	14.0441	14.129	14.0868	14.0868	13.9539	13.9443	14.2908
ASMM10P031697V4	3.80165	4.54586	3.86867	4.58612	2.32254	3.39465	4.39359
ASMM10AP1B114478682V4	9.47214	9.28699	9.372	8.82486	9.945	10.1363	10.0525
ASMM10P038018V4	6.17359	6.13326	6.20409	6.39533	5.49772	5.7099	6.03729
ASMM10AP1B100818687V4	6.79892	6.74267	6.45186	6.80776	7.01418	7.19096	7.23654
ASMM10AP1B100031574V4	7.27927	7.12716	7.65958	7.28468	6.07357	6.1803	6.2683
ASMM10P018027V4	7.33523	7.11476	7.21076	7.52105	7.7628	7.55117	7.56258
ASMM10P023927V4	2.42774	3.09184	3.39326	2.7446	3.44717	3.68941	3.40945
ASMM10AP1B100071880V4	8.13647	8.34742	7.83919	8.43774	2.41352	4.00572	4.3637
ASMM10LNC1A100110446V4	6.77728	7.3083	6.5266	7.68377	6.83752	6.28145	6.85806
ASMM10P054829V4	13.5358	13.4237	13.4247	13.4885	12.7305	12.6044	12.3347
ASMM10LNC1A100036511V4	9.51078	9.22478	9.01877	9.50656	7.56902	7.54833	7.60112
mouselincRNA1538+_P1V4	5.45023	6.49262	6.01548	5.31024	4.10855	4.59712	4.91649
ASMM10LNC1A109171750V4	4.38332	4.76046	4.28835	4.40857	4.28364	4.57384	4.41661
ASMM10LNC1A113842964V4	16.2178	15.6287	16.1776	16.3733	15.9089	15.9557	15.9629
ASMM10P032035V4	8.75422	8.22387	8.66312	7.92905	9.82428	10.1233	9.98221
ASMM10P049418V4	9.17244	9.82428	8.55017	8.20071	5.48461	5.40472	3.71344
mouselincRNA1400+_P1V4	2.42774	2.37482	3.44878	3.67121	4.32855	3.845	3.92407
ASMM10AP1B119313049V4	4.18116	3.88912	3.61636	4.08254	3.69855	4.2664	4.36895
ASMM10LNC1A100052861V4	5.31576	5.2831	5.22378	5.32059	5.39952	5.88446	5.834
ASMM10AP1B107047197V4	12.2943	12.0341	12.2509	11.6465	13.2603	13.6482	13.4412
ASMM10LNC1A100009357V4	2.42774	2.37482	3.37788	2.35039	2.3835	2.3219	2.34176
ASMM10P057580V4	6.27188	6.02208	6.13214	6.27132	6.53057	6.66735	6.75868
ASMM10LNC1A104833932V4	7.50379	7.30095	7.31272	7.4898	7.388	7.51817	7.27267
ASMM10P018101V4	2.42774	2.37482	2.82402	3.14427	2.83052	2.64253	3.25032
ASMM10LNC1A111149270V4	4.25716	5.56388	5.24982	3.70247	2.32254	2.65008	2.34871
ASMM10P034775V4	2.42774	2.37482	2.34951	2.35039	2.38789	2.73562	2.44899
ASMM10LNC1A107157189V4	3.89059	3.75587	3.54027	4.7957	3.54168	3.44442	3.70215
ASMM10P023614V4	7.07192	6.39712	6.70786	7.15721	5.99144	5.59345	5.43235
ASMM10LNC1A100011104V4	13.8854	14.4238	13.7734	14.1916	11.3647	11.412	11.2609
ASMM10P012736V4	8.46425	8.53556	8.34422	8.65412	8.3329	8.23765	7.86445
ASMM10LNC1A106645189V4	9.75019	9.69058	9.70001	9.87418	9.64044	9.49378	9.24651
humanlincRNA1945-_P1V4	8.81271	9.33871	8.72041	9.04589	6.42384	6.26124	6.91694
ASMM10LNC1A109102358V4	2.42774	2.37482	2.34951	2.35039	2.46885	2.74685	3.19689
ASMM10LNC1A100116927V4	2.42774	2.37482	2.34951	2.35039	2.4009	2.52381	2.32205
ASMM10LNC1A104190769V4	5.35627	5.32848	5.27287	5.2115	5.44666	4.9142	4.80478
ASMM10LNC1A101626004V4	4.59985	4.56714	4.52582	4.07486	5.42764	5.64639	5.21835
ASMM10AP1B100149751V4	8.96986	8.94946	9.4432	8.57972	10.4638	10.7437	10.6494
humanlincRNA2281-_P1V4	8.00444	7.61572	7.9685	8.09858	4.61785	5.01672	4.20072
ASMM10AP1B101285848V4	7.04301	6.91824	7.05477	6.82559	7.8128	7.889	7.77845
ASMM10LNC1A100077170V4	7.49203	7.30681	7.28752	7.32999	8.79714	8.59676	8.17831
ASMM10LNC1A113857269V4	13.0415	12.8079	12.8536	13.0555	11.8406	11.4233	11.0976
ASMM10LNC1A100116243V4	4.65013	4.59584	4.68801	4.28696	5.08653	5.14916	4.16389
ASMM10AP1B124882053V4	4.5286	4.33677	4.30926	4.7165	5.08342	4.53777	5.0703
ASMM10AP1B126765789V4	7.63538	8.14422	6.91683	7.25058	3.78968	3.55757	4.06233
ASMM10AP1B115448048V4	9.14356	8.93765	9.35447	9.36546	8.33217	8.41967	7.69121
ASMM10AP1B129364672V4	6.05603	5.8585	5.94463	5.76535	5.81796	5.83007	5.92637
humanlincRNA0531+_P1V4	4.89312	4.9618	4.6285	4.90472	5.40604	5.02002	4.66835
ASMM10LNC1A100126536V4	5.46626	5.95546	5.45348	5.23475	6.58578	6.48878	6.35405
ASMM10LNC1A111577038V4	5.8205	5.59974	5.83843	5.74251	6.53038	6.35243	6.15708
ASMM10AP1B114093839V4	7.40899	7.08546	7.0455	6.82714	7.50992	7.64793	7.70245
ASMM10LNC1A100642617V4	5.73839	6.63297	5.46861	4.80492	3.32655	3.57218	3.40968
ASMM10AP1B100057760V4	3.64215	3.29955	3.3303	3.22874	4.51837	3.95707	3.60218
ASMM10AP1B106304633V4	8.52083	8.69505	8.76124	8.71513	8.88801	9.26352	8.92118
ASMM10AP1B102142497V4	12.6645	12.4079	12.4515	12.6079	12.491	12.2565	12.135
ASMM10AP1B100073923V4	3.02341	3.81189	3.19674	2.82004	3.13036	2.78732	2.51625
ASMM10AP1B117073527V4	13.7376	13.5727	13.4818	13.7692	11.0952	11.001	10.9311
ASMM10LNC1A108729853V4	5.36968	5.53981	5.10512	5.61519	5.92669	5.67242	5.4217
ASMM10LNC1A100010794V4	5.6201	5.83607	6.01939	5.54154	6.08638	6.20873	5.87337
ASMM10AP1B114965886V4	4.7796	4.49177	4.62366	4.63125	6.75929	6.19489	5.95314
ASMM10LNC1A105067330V4	6.06627	5.99028	5.81556	6.13801	6.01615	5.07436	5.55053
ASMM10AP1B100067802V4	6.2576	6.39907	6.41973	6.64086	3.93293	3.97142	4.53754
ASMM10LNC1A102552518V4	13.1898	12.48	12.3623	12.5942	12.6867	12.5586	12.5656
ASMM10AP1B100087673V4	15.7254	15.6239	16.0434	15.8317	16.5066	16.5066	16.5379
ASMM10LNC1A108670110V4	7.97482	7.61382	7.65283	7.99173	7.90483	7.78079	7.83363
ASMM10LNC1A100058451V4	8.44918	8.29579	8.1741	8.61025	8.34218	8.31244	8.23729
ASMM10LNC1A100095032V4	15.9736	15.8775	15.8413	15.8896	15.7561	15.6816	15.6205
ASMM10AP1B111839870V4	8.12453	7.83763	8.36911	8.32296	7.64927	7.86574	7.77409
ASMM10LNC1A101660689V4	7.44581	7.32871	7.41735	7.51073	5.79535	6.1662	6.03987
ASMM10LNC1A103970750V4	8.30505	8.23035	8.0344	8.49705	9.17512	9.21177	9.14658
ASMM10LNC1A104143206V4	7.22217	7.44121	7.18306	7.34963	6.6081	6.71256	6.79264
ASMM10AP1B100054816V4	5.47381	5.65772	5.98144	5.45513	3.6198	4.54695	3.94661
ASMM10LNC1A103900983V4	6.85843	6.55838	6.82559	6.57198	7.89407	7.979	7.94787
ASMM10AP1B100198382V4	10.3772	9.95228	10.3645	10.1576	8.52223	8.46142	8.70215
ASMM10LNC1A100086975V4	7.23778	7.22649	7.21622	7.35189	7.4846	7.18898	7.19254
ASMM10AP1B125104268V4	2.95998	4.22904	4.17051	3.90259	5.14049	4.71313	4.6047
ASMM10LNC1A104295016V4	6.22098	6.02184	6.08319	6.3357	6.14573	5.99423	5.81828
ASMM10AP1B112926869V4	6.95405	6.50969	6.56045	6.61833	7.46145	7.12631	7.16028
ASMM10P034092V4	6.44358	7.03757	6.51492	6.53505	4.36377	3.98701	4.34203
ASMM10AP1B108953772V4	6.91754	6.69407	6.96582	7.04728	7.25303	7.58867	7.62495
ASMM10P051359V4	6.74907	7.01227	6.69307	7.27541	7.07098	6.93129	6.97007
ASMM10AP1B100047301V4	8.26779	8.75628	8.06259	7.00205	8.28785	7.96929	8.38171
ASMM10LNC1A100004807V4	5.54289	5.57939	6.03504	4.83659	6.34511	6.59856	6.65469
ASMM10UP134V4	4.35081	4.48457	4.35092	4.22378	3.03066	3.09715	3.90079
ASMM10LNC1A109230128V4	6.23913	6.13438	6.05184	6.23228	7.27192	7.32841	7.32123
ASMM10AP1B100438974V4	13.6621	13.5816	13.6355	13.901	11.8146	11.8898	12.0665
ASMM10LNC1A100106376V4	5.83364	5.75096	6.05438	6.02956	6.27447	5.85282	6.08277
ASMM10LNC1A112418269V4	5.22747	4.36516	5.08197	5.02307	6.53781	6.69361	6.69027
ASMM10AP1B100114975V4	16.1892	15.8153	16.3692	16.1515	16.7183	16.7222	16.8134
ASMM10AP1B102556987V4	6.9403	6.96898	7.01956	7.1454	7.80762	7.7261	7.88083
ASMM10AP1B111426558V4	4.8058	4.14114	4.72023	4.48054	4.89615	5.07687	5.05669
ASMM10P057674V4	2.42774	2.37482	2.34951	2.35039	2.32254	2.3219	2.32205
ASMM10LNC1A100010944V4	2.42774	2.37482	2.34951	2.35039	3.51782	2.79194	2.82186
ASMM10AP1B101126674V4	8.77362	8.71976	8.44635	8.05186	10.4244	10.654	10.5884
ASMM10P039809V4	5.82091	7.44608	7.31114	6.11482	5.57165	5.21517	4.99571
ASMM10P057969V4	3.27315	3.82364	3.3347	3.81302	4.53927	4.07583	4.46647
ASMM10P013274V4	12.3753	12.5647	12.3442	12.5076	11.5014	11.3754	11.4735
ASMM10LNC1A100047353V4	2.42774	2.37482	2.34951	2.35039	2.32254	2.3219	2.32205
ASMM10AP1B113419107V4	6.24698	6.34103	6.09031	5.47883	7.60805	7.61903	7.50805
ASMM10AP1B108238924V4	6.92577	6.82377	6.78147	6.55914	5.47984	5.20301	5.42986
ASMM10LNC1A110736244V4	9.04176	8.62876	8.9323	9.33937	9.49205	9.84027	9.57416
ASMM10LNC1A100000414V4	7.20818	7.03747	7.18213	7.35679	7.37388	7.35461	7.52939
ASMM10LNC1A111148566V4	13.7341	13.9172	13.9635	14.3493	13.901	13.9513	13.9127
ASMM10P023690V4	3.68606	2.37482	3.21564	3.01025	2.96959	2.47211	3.45206
ASMM10LNC1A111294975V4	4.29777	3.82793	3.46664	2.35039	5.50036	5.61251	6.17454
ASMM10LNC1A115686857V4	3.93086	3.67087	4.02475	4.17533	6.2092	5.77043	5.84302
ASMM10LNC1A115946829V4	6.53926	6.60519	6.52677	6.06522	7.45852	7.63298	7.59571
ASMM10LNC1A100116984V4	2.42774	2.37482	2.34951	2.35039	2.84386	2.3219	2.90244
ASMM10P020000V4	6.42631	6.42849	6.35342	6.49341	5.83711	5.31392	5.58911
ASMM10P035271V4	6.04454	5.88755	5.7363	6.02319	6.17177	5.35347	5.45335
ASMM10P025538V4	9.12075	9.42172	8.99631	9.38913	7.5059	7.33153	7.29148
ASMM10LNC1A100784323V4	11.2551	10.3211	10.3068	10.6896	9.86993	9.5984	9.58503
ASMM10AP1B102483943V4	6.04497	5.47835	5.54085	5.87242	6.06843	5.86358	6.0342
ASMM10AP1B114848460V4	7.44709	7.10266	7.5419	7.41977	8.32681	8.43015	8.54536
ASMM10AP1B100093689V4	3.5394	2.87197	2.80261	2.35039	2.92025	2.3219	3.22975
ASMM10LNC1A100111443V4	4.2274	4.1944	4.20596	4.19657	2.32254	2.50241	2.68629
mouselincRNA0136+_P1V4	2.42774	2.37482	2.34951	2.35039	2.32254	2.3219	2.32205
ASMM10AP1B114124831V4	6.07255	5.86367	6.04694	5.64535	6.13237	6.33852	6.57414
ASMM10AP1B120319090V4	7.97005	7.60959	7.51042	7.68367	7.55554	7.56306	7.59369
ASMM10AP1B114823108V4	7.53076	7.45813	7.49159	7.4125	7.27063	7.09784	7.37485
ASMM10AP1B103469360V4	7.84044	7.79724	7.85708	7.60966	7.97244	7.74809	7.85503
ASMM10LNC1A108457969V4	13.0595	13.0941	13.2715	13.3042	11.2738	11.0343	11.0711
ASMM10AP1B110757691V4	6.63792	6.57619	6.39837	5.82337	7.72651	7.83217	7.98419
ASMM10AP1B115728692V4	6.07451	5.65299	5.9602	5.49635	5.81206	5.90566	6.22863
ASMM10LNC1A102142401V4	6.13931	6.43616	6.09919	6.29879	4.56251	5.13959	5.43009
ASMM10LNC1A100110900V4	16.2817	16.4278	16.4224	16.1448	15.6423	15.595	15.669
ASMM10AP1B107108933V4	7.63319	8.33804	8.12471	7.55208	8.07452	7.89473	8.16184
ASMM10LNC1A104172871V4	3.6114	3.62183	3.71156	3.65902	3.59033	2.48535	4.06829
ASMM10LNC1A109672373V4	7.92364	7.7426	7.99985	8.58947	8.21256	7.96737	7.81941
ASMM10LNC1A100015673V4	7.79942	7.95788	7.86452	7.94308	7.31291	7.17726	7.44581
ASMM10AP1B118795647V4	11.3259	11.086	11.03	11.3811	10.302	9.96391	10.152
ASMM10LNC1A109066223V4	7.52334	9.00366	9.00328	7.4588	7.08893	6.88173	7.31322
ASMM10LNC1A100058210V4	8.22617	8.02424	8.05113	8.24142	7.22725	7.16818	7.40616
ASMM10AP1B112227127V4	6.62538	6.64837	6.30421	6.92117	6.05276	6.30211	6.56467
ASMM10AP1B110968487V4	10.3627	11.0849	10.4712	10.4059	9.63863	9.43701	9.58529
ASMM10AP1B125157043V4	7.39465	7.35441	7.05721	7.26766	9.09035	9.07373	9.28615
ASMM10LNC1A103643140V4	10.4311	10.403	10.3898	10.5142	9.68448	9.50568	9.67206
ASMM10P030544V4	10.0527	9.80659	9.8544	9.81486	10.0481	9.76707	9.74806
ASMM10LNC1A100032190V4	5.53257	5.20873	5.54598	5.85618	4.82902	4.70144	5.57716
ASMM10LNC1A100385084V4	4.71016	4.52	4.91457	4.53927	6.44648	6.73256	6.36888
ASMM10LNC1A104260510V4	12.6271	12.4579	12.6285	12.3971	14.3328	14.3882	14.4577
ASMM10LNC1A100584396V4	7.65795	7.49524	7.38667	7.69701	7.67647	7.68152	8.02478
ASMM10LNC1A115917245V4	10.0348	9.80496	9.98676	10.2621	11.3352	11.2872	11.4309
ASMM10LNC1A109272662V4	2.42774	2.37482	2.34951	2.35039	2.94965	3.76851	3.66997
ASMM10LNC1A110350200V4	3.66478	3.92793	3.66108	4.36451	3.81819	2.66448	2.76651
ASMM10AP1B100193537V4	10.1272	10.1371	10.3268	9.74021	8.52054	8.10971	8.25455
ASMM10LNC1A103433848V4	7.39137	7.57578	7.41307	7.77791	7.41076	7.60309	7.97567
ASMM10P056610V4	5.5171	4.83745	5.69937	2.56098	3.10258	2.41582	2.43594
ASMM10AP1B100133122V4	7.175	6.81855	6.95282	7.03178	7.61593	7.53694	7.51384
ASMM10LNC1A105677032V4	6.39747	6.30907	6.29664	5.93575	5.73211	5.37821	5.4757
ASMM10LNC1A100074353V4	7.81192	7.73968	8.15008	8.01172	7.1927	7.16585	7.52973
ASMM10LNC1A111631685V4	6.48413	6.14375	6.42406	6.32439	5.64189	5.82976	5.91877
ASMM10LNC1A100645619V4	10.4699	10.6002	10.724	10.7077	11.3711	11.2087	11.2899
ASMM10LNC1A101717288V4	6.76242	6.63977	6.6507	6.79373	6.3744	6.29994	6.44945
ASMM10AP1B100150388V4	8.90603	8.41813	9.0931	8.68155	8.42496	8.12327	8.43255
ASMM10AP1B100048443V4	12.4946	12.3878	12.6565	13.3203	9.44339	9.18003	10.8354
ASMM10AP1B107933065V4	13.1341	13.2157	13.1907	12.5532	14.0098	13.6033	13.9817
ASMM10LNC1A104659947V4	8.14925	8.69568	8.45801	8.51142	8.13837	8.24015	8.45847
ASMM10AP1B108897096V4	14.6775	14.5434	14.7239	14.8662	15.0238	15.0776	15.2191
ASMM10LNC1A106951211V4	5.93378	6.09114	5.92189	6.08232	4.04394	4.36086	4.70846
ASMM10LNC1A109635991V4	8.86049	8.61789	8.41915	9.2062	8.10117	8.18554	8.36675
ASMM10P029281V4	6.85538	7.65649	6.65244	7.37304	5.93242	5.57388	6.18988
ASMM10AP1B100073431V4	9.15846	8.73636	8.72412	8.57911	11.71	11.9232	11.8777
ASMM10AP1B111542882V4	6.68752	6.55519	6.80795	7.02524	6.66799	6.88667	6.75913
ASMM10LNC1A111100372V4	7.52752	7.13952	7.14966	7.50543	6.88402	7.35302	7.48841
ASMM10LNC1A100091586V4	6.91244	6.66908	6.51951	7.01009	7.77828	7.66314	7.68023
ASMM10AP1B122002358V4	7.72289	7.51308	7.50527	7.78279	7.84742	7.66973	7.86682
ASMM10AP1B120982535V4	8.19263	8.12453	7.77832	8.54536	9.60565	9.58413	9.61512
ASMM10AP1B111061859V4	7.08965	6.44406	6.95123	6.3678	8.38352	8.63082	8.25439
ASMM10P051796V4	4.61443	4.87745	4.83317	5.00169	3.8864	4.11454	4.16939
ASMM10AP1B115059262V4	6.69113	5.81018	6.28036	7.10833	7.59993	7.91655	7.65656
ASMM10LNC1A100055725V4	9.42216	8.7386	9.28705	9.3251	9.09568	8.9922	9.01015
ASMM10AP1B101683633V4	7.02442	6.85524	6.87234	7.15985	6.55506	6.81446	6.76614
ASMM10LNC1A112072222V4	12.1278	11.9902	12.1269	12.1358	10.2384	10.075	10.0169
ASMM10AP1B118017343V4	15.4901	15.4351	15.4393	15.5522	14.5876	14.0592	13.896
ASMM10AP1B112782689V4	6.10209	6.26448	6.35568	6.13633	5.93106	6.23896	6.27842
ASMM10LNC1A103336024V4	5.8583	6.22668	5.75945	5.83345	5.22736	4.90572	4.87544
ASMM10LNC1A106577053V4	6.26434	6.07009	6.74155	6.37545	7.67185	7.71285	7.72208
ASMM10LNC1A100063787V4	11.376	10.696	10.9179	11.4642	10.3189	10.0431	9.94906
ASMM10P024463V4	10.6936	11.5347	12.8687	11.2936	5.99404	6.27783	6.62425
ASMM10LNC1A106926057V4	4.83487	4.79527	4.7787	4.87035	5.05433	5.29063	5.39555
ASMM10LNC1A100100457V4	2.42774	2.37482	2.34951	2.35039	4.21422	4.36948	4.26805
ASMM10P057743V4	7.52694	7.3304	7.22608	7.58572	7.95255	7.91998	7.78697
ASMM10AP1B116688509V4	6.92174	6.61987	7.01966	6.97358	7.65579	7.5628	7.30095
ASMM10AP1B100107018V4	7.04736	6.62074	6.7343	7.0714	6.78175	6.68168	6.29515
ASMM10P055982V4	5.29082	5.40166	5.34198	5.2532	3.6638	4.23942	4.11005
ASMM10LNC1A100011097V4	3.88354	4.4391	3.70221	5.05733	3.1909	3.55428	2.58761
ASMM10AP1B121493352V4	7.64458	7.24357	7.32249	7.54083	8.62535	8.50225	8.28793
ASMM10AP1B103636750V4	3.49355	3.22225	3.22732	2.67948	4.80698	4.33884	3.70192
ASMM10AP1B100179910V4	8.59785	7.67374	8.36124	8.28957	9.32084	9.59864	9.2966
ASMM10LNC1A100111730V4	9.39268	9.85587	9.64481	9.7014	9.58903	9.54617	9.68582
ASMM10P028517V4	4.67689	5.09863	4.60194	4.92309	3.86046	3.89422	3.18375
ASMM10P034984V4	2.42774	2.37482	2.34951	2.35039	2.32254	2.3219	2.32205
ASMM10AP1B104257686V4	4.02921	3.93523	3.72678	3.53495	4.35541	4.80772	4.64563
ASMM10P013001V4	8.93606	9.1055	9.08169	9.0238	8.81876	9.05092	8.39661
ASMM10LNC1A106140764V4	9.03016	8.83061	9.04196	8.97905	8.35364	8.32296	8.02797
ASMM10LNC1A100126825V4	5.3764	5.25175	5.27304	5.30813	5.96155	5.73765	5.72759
ASMM10AP1B100150648V4	12.2041	12.381	12.1912	11.9525	12.9919	13.2544	13.4089
ASMM10AP1B100128289V4	13.5727	13.7233	13.7275	13.8228	13.9838	14.0166	14.1174
ASMM10LNC1A113660428V4	6.39489	6.40759	6.17726	6.17041	6.35608	6.50804	6.3531
ASMM10LNC1A110933649V4	9.60717	9.55391	9.51592	9.49435	8.89693	9.06471	8.56521
ASMM10LNC1A105181282V4	7.85563	7.76406	7.59955	7.88752	8.31458	8.18478	7.98929
ASMM10P058243V4	6.04352	6.21508	5.95752	5.95972	6.30694	6.10723	5.39008
ASMM10LNC1A113885322V4	4.76997	4.58123	4.91779	4.66051	5.61088	5.66275	5.49524
ASMM10AP1B112577412V4	7.1743	7.19045	7.24821	6.83048	8.36437	8.22753	7.97585
ASMM10P035312V4	2.42774	3.25756	4.00767	3.71072	4.68758	4.42527	2.81839
ASMM10AP1B108718830V4	5.31063	5.16079	5.10501	5.21446	6.67478	6.15758	6.42495
ASMM10AP1B115434184V4	13.8251	13.9708	14.2126	13.9751	14.5064	14.4711	14.5563
ASMM10P040068V4	6.25064	8.20855	8.03308	6.40201	4.77089	5.17544	4.53687
ASMM10AP1B106679342V4	7.58681	7.3308	7.40881	7.7231	7.77141	7.99392	7.81063
ASMM10LNC1A100068523V4	6.10792	6.57648	6.09282	6.66238	6.0959	5.8733	6.20252
ASMM10AP1B114089436V4	9.02486	8.56326	8.73217	7.51254	10.4727	10.448	10.3178
mouselincRNA0108-_P1V4	3.79123	3.89059	3.55428	3.93989	3.43838	4.35097	3.9368
ASMM10AP1B100168170V4	3.49384	3.43774	3.41926	3.54629	2.32254	2.3219	2.32205
ASMM10AP1B108355743V4	7.19551	7.22168	7.02785	7.17327	6.9267	7.00518	6.898
ASMM10LNC1A114819545V4	10.1036	9.9184	10.445	10.0873	9.99844	10.0044	10.0618
ASMM10LNC1A101639222V4	5.60627	6.13247	5.36185	5.35892	6.02711	5.64503	5.62556
ASMM10AP1B100010971V4	10.759	11.2801	10.5791	10.8774	9.46207	9.32084	9.52728
ASMM10AP1B106302956V4	10.4295	10.156	10.2326	10.547	9.93315	9.72364	9.67052
ASMM10LNC1A100041304V4	3.13136	4.25419	3.12021	3.98075	2.32254	2.3219	3.12021
ASMM10AP1B109322667V4	7.45675	7.15291	7.30427	7.31053	8.22849	8.14883	8.14925
ASMM10UP142V4	4.63576	4.42465	4.08511	4.59707	4.8848	5.07214	4.92946
ASMM10AP1B100002825V4	8.40678	9.28736	9.21201	8.36377	8.63101	8.56997	8.70063
ASMM10P026222V4	7.90467	7.74891	7.71028	7.81451	8.25604	8.2259	8.32671
ASMM10LNC1A111555189V4	4.81451	4.71707	4.48396	4.55453	4.21133	4.24059	4.28835
ASMM10AP1B100170357V4	3.26287	3.43157	2.93167	3.24598	2.50583	2.3219	2.32205
ASMM10LNC1A100020776V4	2.42774	2.37482	2.34951	2.35039	2.37908	2.3289	2.32205
ASMM10LNC1A111848303V4	5.65222	5.63199	5.81902	5.88104	7.80871	7.50497	7.51785
ASMM10AP1B101952528V4	6.58568	6.07543	6.36102	6.08596	6.48258	6.58134	6.89105
ASMM10AP1B103800095V4	6.2772	6.19959	6.35628	6.36939	6.99982	6.97082	6.99173
ASMM10LNC1A104478960V4	9.49859	9.36549	9.18262	10.6839	7.04822	6.76085	6.49178
ASMM10AP1B122590647V4	9.48353	9.27377	9.32737	9.60426	9.32232	9.05897	9.27021
ASMM10LNC1A100004804V4	7.42583	6.80175	7.04143	6.95183	5.80951	5.40554	4.73596
ASMM10AP1B104765426V4	4.82087	4.87072	4.86288	5.46757	4.45641	3.62926	3.79439
ASMM10LNC1A106171080V4	7.07309	6.76766	7.18701	6.95943	7.21127	7.17984	7.5257
ASMM10AP1B100035868V4	5.50315	4.29736	5.01722	5.26405	3.0052	2.3219	3.4497
ASMM10LNC1A106952459V4	5.37922	5.26471	5.27579	5.72625	6.43284	6.11157	5.99161
ASMM10AP1B104092231V4	7.61795	7.29139	7.58238	6.81398	7.7166	8.32578	8.17177
ASMM10AP1B100152142V4	11.3917	11.4859	11.6404	10.761	12.7344	12.1197	12.7643
ASMM10AP1B105080431V4	8.00677	7.13978	7.03641	8.26146	7.93141	8.22819	8.0485
ASMM10LNC1A100062433V4	7.43232	8.63429	8.5725	7.38964	7.16118	6.99611	6.98363
ASMM10AP1B107143417V4	7.85949	8.21805	7.92107	8.17601	6.98048	6.98328	6.99575
ASMM10LNC1A107672088V4	8.26328	9.26483	9.26552	8.34202	9.15402	9.18074	9.74653
ASMM10P038181V4	7.62602	7.47613	7.85285	7.41193	8.61382	8.50013	8.92154
ASMM10AP1B100231882V4	16.2773	15.8345	16.2178	16.2515	15.0911	15.1522	15.0542
ASMM10LNC1A111816883V4	4.47443	5.25002	4.86811	4.45057	4.13465	4.22699	4.03226
ASMM10P041840V4	8.99302	9.5628	8.92558	8.15077	9.17968	9.21991	9.2839
ASMM10LNC1A104232373V4	8.93748	8.92711	9.16639	9.06619	8.95198	9.27985	9.1195
ASMM10AP1B115508307V4	7.37786	7.01303	7.45889	7.87996	6.63826	7.11255	6.74575
ASMM10LNC1A105666507V4	5.78499	5.72362	5.64941	5.68444	5.41346	5.78565	5.82108
ASMM10LNC1A107024693V4	12.3783	12.385	12.5788	12.4999	12.174	12.1022	12.0993
ASMM10P057898V4	3.97833	3.54919	3.35449	3.26439	2.32254	2.3219	2.7819
ASMM10LNC1A100089099V4	5.84135	5.64291	5.66172	5.81991	5.28126	5.28344	5.29865
ASMM10AP1B118984447V4	6.78336	6.90603	6.70864	6.73823	6.21836	6.15123	6.56946
ASMM10AP1B110576545V4	5.10367	4.76798	5.0845	5.09771	5.72738	5.875	5.67149
ASMM10AP1B100154462V4	7.79487	7.55416	7.94862	8.03276	7.11107	7.11169	7.27927
ASMM10AP1B117243066V4	9.13167	9.85691	8.50977	8.58174	7.91907	7.78062	7.35715
ASMM10LNC1A110628327V4	5.03045	4.59707	4.48054	4.94361	4.53687	4.84701	5.24916
ASMM10P051339V4	6.40991	6.81242	6.06293	6.66245	5.45504	4.09952	4.95945
ASMM10AP1B114852494V4	10.7626	10.8953	10.9276	11.1029	10.988	10.9358	11.169
ASMM10P022879V4	2.42774	2.37482	3.44012	3.05181	3.20012	2.3219	2.32205
ASMM10LNC1A100047870V4	7.13717	7.40215	7.08372	7.13931	6.52627	6.43027	6.60065
ASMM10AP1B116226791V4	5.90048	5.88854	5.73338	5.96168	5.85684	6.24026	6.23128
ASMM10LNC1A112940253V4	9.4169	9.62082	9.54099	9.31322	9.57749	9.42752	9.30847
ASMM10AP1B100624758V4	8.29035	7.98034	7.94772	8.23126	8.57548	8.27874	8.10549
ASMM10AP1B114757892V4	9.05104	8.703	10.2315	7.97741	8.98534	8.30556	9.83784
ASMM10LNC1A100068637V4	7.08014	6.88071	6.57286	6.46459	5.9811	5.28797	5.97506
ASMM10AP1B119254750V4	7.92188	7.61005	8.36873	7.97059	9.1223	8.91171	9.00343
ASMM10LNC1A113996885V4	9.19873	9.25593	8.88344	9.35447	9.36607	9.17943	9.28159
ASMM10LNC1A103469156V4	6.50717	6.03076	6.10519	7.38331	6.0734	6.35679	6.22535
ASMM10AP1B100425630V4	8.60681	8.533	8.84693	8.78883	8.76189	8.7116	8.85108
ASMM10LNC1A104659565V4	5.73859	6.00071	5.67441	5.66721	4.84727	5.39383	4.51934
ASMM10LNC1A100042634V4	3.77559	3.66693	3.37078	3.04575	4.75141	3.81776	3.38575
ASMM10AP1B100031767V4	5.56721	5.17877	5.26237	3.74756	4.36959	3.81533	4.00974
ASMM10LNC1A112071889V4	3.00161	2.37482	3.131	2.35039	3.95004	2.87356	3.103
ASMM10P017032V4	8.37123	8.53898	8.59117	8.62322	8.00414	7.95936	7.93697
ASMM10LNC1A100095616V4	7.4186	7.59507	7.17748	7.48136	6.41653	6.49663	6.41937
ASMM10AP1B102695633V4	8.18923	9.19699	9.11672	8.63652	8.79919	9.53628	9.34801
ASMM10LNC1A100069038V4	5.31943	6.91981	5.97432	5.94327	5.51603	4.35866	5.11673
ASMM10LNC1A104870212V4	6.07515	5.98383	6.05475	6.3014	6.94134	7.37758	7.121
ASMM10P043069V4	7.00792	6.96665	6.88651	7.5855	7.18758	7.21163	7.34316
ASMM10AP1B102548590V4	6.35414	6.41613	6.41854	6.8717	6.6025	6.86217	6.94173
ASMM10P050487V4	4.89974	5.14906	4.94675	4.82312	4.30772	4.3032	4.56374
ASMM10LNC1A100126966V4	8.32376	8.26266	8.20106	8.25272	8.25508	8.05997	8.26157
ASMM10LNC1A100026572V4	4.58043	4.54852	4.20734	4.34516	2.38305	2.73949	3.08428
ASMM10LNC1A101639404V4	4.61591	4.40932	4.12902	4.85719	2.81023	3.96598	4.05705
ASMM10LNC1A100021411V4	5.38186	5.29167	5.21957	5.41567	5.14073	5.64646	5.71417
ASMM10P036440V4	2.42774	2.37482	2.34951	2.35039	4.4047	4.46713	4.43362
ASMM10AP1B100036161V4	5.10827	5.22832	5.21475	5.47242	4.96945	5.66434	5.03537
ASMM10AP1B128143541V4	8.55948	8.26128	8.52765	8.38096	10.2538	10.4592	10.3033
ASMM10AP1B120085414V4	13.7786	13.9199	13.7809	13.2959	14.2126	14.1503	14.3894
ASMM10LNC1A100031349V4	14.5539	14.5292	14.6402	14.5233	13.9936	13.9593	13.9548
ASMM10P027176V4	5.02748	5.26084	5.27974	4.59712	2.97678	4.23181	4.34532
ASMM10LNC1A111017469V4	5.07656	4.97001	4.80968	5.14777	4.38684	4.32211	4.19537
ASMM10LNC1A100064013V4	6.57531	6.81253	6.44626	6.69361	6.36329	6.46687	6.8636
ASMM10LNC1A110017179V4	9.28051	9.15044	9.13498	9.46016	9.68618	9.42698	9.43575
ASMM10AP1B108315671V4	10.7802	10.8196	10.8412	10.848	10.307	10.2326	10.3463
ASMM10P057986V4	4.39184	4.45457	4.64167	4.40603	2.98884	3.05699	3.97322
ASMM10LNC1A105172089V4	4.98765	5.73069	6.11278	6.27525	5.99309	5.99555	6.3117
ASMM10AP1B107816103V4	2.42774	2.37482	2.34951	3.57511	4.91686	4.61283	4.68388
mouselincRNA0166-_P1V4	4.19657	4.30905	4.51509	4.46217	3.47782	3.46837	4.21854
ASMM10P040331V4	6.03371	5.40573	5.54913	4.43381	4.69226	4.91983	4.32903
ASMM10LNC1A100068557V4	4.99434	5.88826	5.38615	5.0373	6.47626	5.8394	6.1944
ASMM10AP1B100186256V4	4.7555	5.26281	4.59882	5.20833	4.35016	4.27804	4.33857
ASMM10P013722V4	2.42774	3.2486	2.34951	3.14726	4.99157	4.36525	4.37958
ASMM10LNC1A103295105V4	10.9972	11.4314	11.0154	11.1959	12.0008	11.8293	12.0745
ASMM10AP1B125374555V4	6.08431	6.00476	5.90235	5.96207	4.84097	4.95981	4.90362
ASMM10UP505V4	3.80572	4.41447	4.42444	4.61756	3.4212	3.81978	3.88138
ASMM10AP1B111235405V4	10.3141	10.2502	10.3398	10.6467	9.23437	8.85065	9.09449
ASMM10LNC1A100060652V4	4.10552	4.14093	3.88576	4.72167	4.59081	3.93137	4.22999
ASMM10LNC1A113485843V4	8.98769	8.69375	9.3328	8.99543	10.3213	10.6929	10.4237
ASMM10LNC1A100042714V4	8.14126	8.29668	8.21329	8.28026	7.89317	8.06746	8.2949
ASMM10LNC1A114999205V4	4.25958	4.40784	4.70412	4.6519	4.8468	4.7036	5.04239
ASMM10P058225V4	7.42276	7.55278	7.50657	7.85392	7.38307	7.23174	7.50243
mouselincRNA0152-_P1V4	3.85473	4.4936	4.07697	3.96192	3.23645	3.84367	3.90212
ASMM10AP1B111899556V4	5.40806	5.05768	5.23264	5.30007	4.86797	5.38299	5.08771
ASMM10P028635V4	7.17263	6.84764	7.10814	7.20243	6.98979	7.09315	7.10833
ASMM10P023266V4	7.45543	7.40737	7.25549	7.51681	7.20775	7.28571	7.57647
ASMM10P041991V4	5.44269	5.46917	5.35731	5.73412	5.22816	5.2278	5.49126
ASMM10LNC1A111892424V4	4.51862	4.85087	4.91933	4.98936	4.6516	4.64115	5.10672
ASMM10AP1B100041693V4	11.9281	12.259	12.5571	12.24	8.01142	7.84375	8.84344
ASMM10LNC1A106170684V4	6.60073	6.69229	6.55831	6.82678	6.53665	6.66157	6.7088
ASMM10LNC1A100074683V4	8.45329	8.87688	8.48415	8.71848	6.57113	6.724	7.0516
ASMM10LNC1A100086152V4	4.51876	4.92268	4.62718	4.52015	4.43216	4.15621	4.96533
ASMM10AP1B100072702V4	12.8143	13.173	13.0551	12.6645	13.9769	14.2704	14.3141
ASMM10AP1B104381073V4	8.30725	7.84185	7.91232	8.21215	8.62333	8.95448	8.73647
ASMM10LNC1A103832840V4	3.42716	3.90691	3.99482	4.66928	4.17571	3.93149	4.1287
ASMM10P051767V4	4.40696	4.21422	4.17352	4.41758	4.23874	4.44259	4.46315
ASMM10LNC1A108166115V4	5.10845	5.04593	4.73248	4.18994	5.19443	5.48222	5.40337
ASMM10AP1B111351384V4	14.0856	13.8655	13.8877	14.0885	12.3932	12.2189	12.1521
ASMM10LNC1A114945930V4	6.28485	6.17276	6.02801	6.32255	6.5361	6.25245	6.44031
ASMM10LNC1A100111573V4	3.60386	4.15392	3.78316	4.5856	3.36222	2.67903	2.91399
ASMM10LNC1A100100743V4	4.90517	4.56553	4.65705	4.64142	4.41225	3.79204	4.14454
ASMM10LNC1A100136568V4	7.89071	7.51817	7.87211	7.35017	6.75484	7.02003	6.74297
ASMM10P056172V4	6.47465	6.53804	6.30091	6.42182	6.24341	6.52084	6.36692
ASMM10AP1B100029014V4	5.13236	5.28514	5.66455	5.9949	4.74528	5.25591	5.53611
ASMM10P039295V4	3.05076	3.55221	3.00074	3.30545	2.32254	2.38305	2.32205
ASMM10LNC1A106735468V4	5.93654	5.76113	5.74187	6.02325	5.30707	5.98742	5.56514
ASMM10AP1B120080444V4	7.92352	7.75308	7.91174	7.8568	8.50618	8.32007	8.24798
ASMM10LNC1A104258905V4	11.8201	11.8703	11.4674	11.8777	13.0968	12.9675	12.9953
ASMM10P022147V4	8.06252	8.65202	8.27774	9.23424	8.58947	8.51376	8.17234
ASMM10AP1B100031331V4	5.2889	4.70054	3.11383	5.18355	2.32254	2.3219	2.32205
ASMM10AP1B100041987V4	7.91979	7.70378	7.77845	7.91968	8.68655	8.73889	8.58578
ASMM10AP1B112673225V4	6.24508	6.00315	5.97893	6.11861	6.87566	6.7306	7.01147
ASMM10AP1B109869563V4	5.65757	5.62063	5.71535	5.72483	4.35062	4.49651	4.6066
ASMM10LNC1A100005171V4	2.42774	2.37482	2.34951	2.35039	2.32254	2.3219	2.32205
ASMM10LNC1A102850024V4	4.52659	4.06661	4.33216	4.34596	5.21791	5.52088	4.84293
ASMM10AP1B118142909V4	7.83842	7.7517	7.52586	7.79365	8.58439	8.61984	8.68031
ASMM10AP1B123976358V4	10.8325	11.6697	13.5455	9.48782	7.2127	8.22205	8.02052
ASMM10LNC1A105603555V4	13.004	12.9761	13.0508	13.265	14.8933	14.995	14.9433
ASMM10LNC1A109352645V4	10.8876	10.7089	10.9178	10.7066	11.1618	11.2389	11.428
ASMM10LNC1A111269153V4	3.86329	3.581	4.13618	3.40117	4.77027	4.71774	4.60493
ASMM10LNC1A100377616V4	5.45327	5.49245	5.29858	5.53032	6.3261	6.56127	6.69942
ASMM10AP1B116238616V4	3.98736	3.83529	3.81621	3.51027	4.04164	3.72943	3.50703
ASMM10AP1B100164428V4	4.8247	5.21436	5.28049	4.64841	3.04006	4.75349	4.30811
ASMM10LNC1A100079291V4	6.60785	6.46247	6.62326	6.35861	6.90375	7.13782	7.10732
ASMM10AP1B109407141V4	3.0733	3.15888	3.10447	2.35039	4.7607	4.64371	4.37676
ASMM10LNC1A100044371V4	7.2058	7.39384	7.00606	8.71443	6.02976	6.0827	6.29258
ASMM10LNC1A100032200V4	13.7056	13.8027	13.5112	13.6436	12.734	12.6905	12.6224
ASMM10LNC1A111478547V4	5.57511	5.63358	5.83055	5.61594	6.51251	6.50151	6.22933
ASMM10P042218V4	11.2649	11.2194	11.066	11.117	11.5292	11.3477	11.0889
ASMM10P044146V4	4.77534	4.96579	5.13853	5.18306	4.56755	4.94652	3.99028
ASMM10LNC1A102611030V4	4.03615	4.09071	3.03309	3.48419	4.59473	4.95559	3.90542
ASMM10LNC1A100042487V4	2.42774	2.37482	2.34951	2.35039	2.32254	2.64317	2.32205
ASMM10AP1B100076676V4	12.9236	13.0501	12.7473	12.9277	13.8047	13.9838	14.1341
ASMM10AP1B105408009V4	8.13576	7.26502	7.79381	7.89036	6.59242	6.44227	6.05423
ASMM10LNC1A108482755V4	4.68546	4.72062	4.60907	3.79725	4.95029	4.7724	4.77776
ASMM10LNC1A108677612V4	4.49484	5.9625	4.47377	4.20484	4.61544	4.59749	4.42844
ASMM10AP1B111249382V4	8.6468	8.34412	8.44763	8.76495	9.93093	9.77109	9.72321
ASMM10LNC1A103399799V4	5.53858	5.31844	4.92801	5.49685	4.55497	4.23907	4.25748
ASMM10LNC1A108309389V4	8.96495	8.80215	9.09486	9.23664	10.1204	10.0864	10.0962
ASMM10LNC1A106672737V4	8.45385	8.41841	8.42344	8.52182	8.86068	8.789	8.88286
ASMM10LNC1A112885904V4	7.47397	7.18377	7.25735	7.40435	7.73878	7.86298	7.84833
ASMM10LNC1A100052669V4	6.68092	6.49035	6.58804	6.9491	6.05143	5.94825	6.14809
ASMM10LNC1A102007857V4	8.06072	7.5335	7.73309	8.09838	9.4367	9.48011	9.48353
ASMM10AP1B100031822V4	10.0401	10.2764	10.3495	9.77173	11.201	10.9629	11.3647
ASMM10LNC1A117271924V4	4.91233	4.73575	4.78986	5.6665	4.04255	4.32958	3.93534
ASMM10LNC1A112931453V4	4.60418	4.71826	4.83962	4.9778	5.27101	5.06815	4.79072
ASMM10AP1B107335046V4	9.3767	9.31492	9.39189	9.4104	8.1422	8.19246	8.21725
ASMM10AP1B110638281V4	6.9154	6.93888	6.89667	7.08257	6.84966	6.6965	6.56366
ASMM10LNC1A113209406V4	5.78979	5.4721	5.6321	6.03571	7.61932	7.7321	7.52461
ASMM10LNC1A100116737V4	9.19333	9.66406	8.93765	8.06971	9.31992	9.08825	9.59285
ASMM10AP1B114794309V4	7.77418	7.55843	7.39923	7.74068	7.69075	7.58448	7.66291
ASMM10AP1B117120443V4	4.67914	4.89076	5.01928	5.23444	4.13254	4.43316	4.67518
ASMM10LNC1A113708530V4	8.57513	9.12957	7.96929	10.6725	11.0415	10.8561	11.1793
ASMM10LNC1A111659820V4	4.84553	4.74754	4.74954	4.85314	4.84506	5.17696	5.17952
ASMM10LNC1A105942634V4	4.90604	4.50465	4.21909	4.63813	5.98068	5.92109	6.00777
ASMM10AP1B100007156V4	8.51698	7.71625	8.57236	7.51633	8.83997	8.82715	8.94669
ASMM10AP1B100001578V4	3.39395	2.37482	2.99835	3.37979	3.52257	2.59977	3.82803
ASMM10AP1B101733522V4	10.3698	10.3189	10.4459	10.6041	9.22272	9.15908	9.2829
ASMM10LNC1A100079647V4	5.22816	4.62196	5.14396	4.62575	3.49286	3.90824	4.1069
ASMM10AP1B112275692V4	6.88905	6.65469	6.98143	6.99264	7.92022	8.07105	8.04804
ASMM10LNC1A100304403V4	8.83814	8.21382	8.653	8.34441	9.99788	10.4426	10.1146
ASMM10LNC1A109305382V4	4.83803	5.30331	5.22043	5.48281	6.0883	5.91359	6.05177
ASMM10LNC1A101001770V4	8.02752	7.95284	8.04959	8.26209	8.78883	8.29266	8.74335
ASMM10LNC1A100031616V4	9.8719	9.79325	9.55591	10.866	10.1067	9.63406	9.90185
ASMM10AP1B113989798V4	10.2995	10.3123	10.3634	9.99243	11.6177	12.0533	11.9178
ASMM10LNC1A103328965V4	6.4741	6.25792	5.7396	7.00349	7.7991	7.70323	7.75982
ASMM10P057569V4	11.4808	11.7155	11.2105	11.4291	12.0959	12.2306	12.1423
ASMM10AP1B100081570V4	12.5311	11.9424	12.3971	12.5864	11.3265	11.0294	11.0458
ASMM10LNC1A100090365V4	6.00728	5.92297	5.89361	5.83798	5.92766	5.78262	5.98357
ASMM10LNC1A111916420V4	5.52441	5.56902	5.55142	5.79057	5.87931	5.70188	5.65849
ASMM10LNC1A111170601V4	4.53397	4.40069	4.68937	4.39603	4.22152	4.48635	4.38417
ASMM10P016154V4	5.92416	6.08226	5.80439	6.84942	4.34387	4.09524	4.09495
ASMM10AP1B100054472V4	4.15839	4.61188	3.27132	3.40091	2.37111	2.3219	2.32205
ASMM10LNC1A112396341V4	5.1045	4.93013	5.14424	5.19168	6.67199	6.24857	6.42914
ASMM10AP1B123780270V4	8.36629	7.74699	7.87117	8.05615	10.4452	10.6434	10.5853
mouselincRNA0909+_P1V4	5.42606	5.39794	5.42854	5.39812	2.99715	3.12235	3.28378
ASMM10LNC1A100042477V4	2.42774	2.37482	2.34951	2.35039	2.32254	2.3219	2.32205
ASMM10LNC1A107941965V4	4.26398	4.29338	3.82897	4.05344	5.97284	6.00578	6.12956
ASMM10AP1B112509446V4	10.6464	10.3577	10.4051	10.967	10.6045	10.4512	10.7053
ASMM10AP1B100224273V4	6.85561	6.74646	6.76128	6.9255	7.17292	6.98474	6.97198
ASMM10AP1B112718713V4	6.64718	6.17228	6.87106	5.70403	7.22053	7.21467	7.1807
ASMM10AP1B100134807V4	2.42774	2.37482	2.34951	2.35039	3.86498	3.08368	3.30009
ASMM10AP1B100187420V4	3.72461	3.15978	6.11161	2.35039	2.47869	2.3219	2.32205
ASMM10P032006V4	7.42282	7.48936	6.67757	8.94748	7.4536	6.90456	7.78848
ASMM10P015683V4	10.6002	10.6227	10.5035	10.6926	10.3053	10.0632	10.1785
ASMM10LNC1A116957849V4	13.8894	13.8425	13.6861	13.7564	13.5264	13.3757	13.0044
ASMM10AP1B105259079V4	11.2071	10.9245	11.119	10.2624	13.1454	13.3432	13.3375
ASMM10LNC1A109043795V4	4.44961	4.56862	4.41733	3.73337	4.51518	4.6066	5.49779
ASMM10P056117V4	7.7164	7.55521	7.49827	7.72136	7.16739	7.15744	6.94548
ASMM10UP741V4	2.42774	2.37482	2.34951	2.35039	2.32254	2.3219	2.32205
ASMM10AP1B109502668V4	4.53754	4.70751	4.36166	4.5478	5.66116	5.29553	5.55348
ASMM10LNC1A105645227V4	12.4531	12.5519	12.2288	12.4661	11.3662	11.0746	11.1063
ASMM10LNC1A108140922V4	7.65383	7.57963	7.42	7.68421	7.03587	7.04925	6.84545
ASMM10LNC1A109145556V4	5.56487	5.48544	5.30963	5.82757	5.38977	5.31693	5.11209
ASMM10LNC1A104160042V4	3.60118	2.67181	3.00096	2.35039	4.12157	4.40746	4.11271
ASMM10AP1B107394127V4	13.9802	13.8894	13.9328	13.891	13.8431	13.7564	13.9172
ASMM10AP1B123637353V4	4.91093	4.7573	4.77385	4.94383	5.77509	5.55121	5.37387
ASMM10AP1B101285448V4	9.25483	9.25009	9.35042	9.46842	10.3891	10.4204	10.5044
ASMM10AP1B119119043V4	5.61438	5.60685	5.77217	5.68896	5.32554	4.6262	5.15961
ASMM10AP1B100084535V4	7.69061	7.74368	7.57855	7.72669	7.81908	7.78133	7.80774
ASMM10LNC1A109100614V4	6.53665	6.43203	6.50756	6.10519	6.38242	6.16499	6.1446
ASMM10AP1B100177938V4	3.51689	2.75513	4.08879	5.47088	2.54329	2.3219	3.76885
ASMM10P022204V4	11.2343	11.1778	11.2058	11.477	6.96794	6.83291	7.26946
ASMM10AP1B108450284V4	7.24116	6.73174	6.78194	7.18428	8.59349	8.77233	8.93039
ASMM10LNC1A104668253V4	5.02767	4.93501	4.66266	5.38663	5.74658	5.34745	4.95675
ASMM10P026886V4	2.42774	2.37482	2.83761	2.35039	2.32254	2.42876	2.95998
ASMM10LNC1A100079884V4	9.71063	9.48482	10.0825	9.8926	9.27163	9.16279	9.29987
ASMM10LNC1A100025995V4	5.59518	5.59227	5.7064	5.53127	4.95722	4.678	5.1122
ASMM10P034518V4	4.37164	3.86729	4.5055	4.54737	4.67429	4.32194	4.95077
ASMM10LNC1A100120541V4	5.41507	5.49393	5.51178	5.1378	4.96973	5.36327	5.38912
ASMM10LNC1A100079781V4	6.85307	6.81283	6.87429	6.80955	6.89792	7.01515	7.03772
ASMM10LNC1A101633617V4	6.24026	6.30609	6.55495	6.47438	5.82929	5.54617	5.8428
ASMM10AP1B107073915V4	7.55269	7.66119	7.46437	7.46671	6.77704	6.72834	6.976
ASMM10AP1B107596277V4	8.26741	7.93902	8.53364	8.21109	9.2062	9.04361	9.36162
ASMM10LNC1A100079646V4	4.70874	4.74528	4.47926	4.72948	3.78249	3.66671	4.33216
ASMM10P052067V4	3.84397	4.8091	3.50605	4.57542	3.51882	2.32781	2.32205
ASMM10LNC1A100078047V4	6.14598	6.25814	5.91172	6.47448	7.09378	6.83646	6.80976
ASMM10LNC1A100099373V4	8.90761	9.08438	8.90827	9.22478	9.88891	10.6578	10.221
ASMM10LNC1A103335800V4	5.88716	6.06151	5.93079	6.02004	4.57001	5.052	4.95657
ASMM10LNC1A105876190V4	8.41978	8.2856	8.232	8.24641	7.93501	8.04973	8.23945
ASMM10AP1B101121509V4	11.8762	11.0119	11.8703	12.2491	11.8082	12.3726	11.9838
ASMM10LNC1A107074418V4	7.40313	7.16488	7.34203	7.27355	8.628	8.68794	8.56537
ASMM10AP1B100010354V4	3.5757	3.86667	3.69328	4.4003	2.69058	3.109	3.59449
ASMM10AP1B107682868V4	7.81236	7.71574	8.1575	7.81084	7.64906	7.85026	7.99697
ASMM10LNC1A100052534V4	6.96051	6.79291	6.5473	6.71161	5.92538	5.91305	6.27352
ASMM10LNC1A109639876V4	9.10301	8.81286	8.76055	8.96316	8.30743	8.27834	8.46257
ASMM10AP1B100015899V4	7.98973	8.01353	7.95567	8.16521	7.13233	7.07685	7.30324
ASMM10LNC1A100926472V4	7.51458	9.00486	9.04273	7.8471	6.52041	6.12963	6.66211
ASMM10LNC1A104627682V4	7.96749	7.98694	7.81261	8.20568	5.55601	5.58192	6.02953
ASMM10LNC1A101751929V4	5.97713	6.21165	6.13489	6.26405	5.56908	5.60711	5.84159
ASMM10LNC1A100063520V4	8.85824	8.71994	8.91064	8.92571	7.35418	7.00181	7.1436
ASMM10P031839V4	7.13257	6.9294	7.09933	7.10117	6.03248	5.78842	6.03715
ASMM10LNC1A114345745V4	8.32645	8.3505	8.48283	8.71534	7.83	7.63353	7.8877
ASMM10AP1B112827914V4	3.84656	4.5115	3.74016	4.18916	4.24025	4.05656	4.06981
ASMM10LNC1A106751418V4	7.16428	7.15153	7.70702	6.08665	9.92234	9.941	10.167
ASMM10LNC1A108170989V4	7.79272	7.68519	8.20409	7.93727	8.38199	8.57489	8.63093
ASMM10LNC1A111015398V4	6.01864	5.89828	5.88645	6.23737	6.7889	6.88831	6.86732
ASMM10AP1B100084990V4	11.1467	11.36	11.4178	11.3116	9.61649	9.52821	9.52482
ASMM10AP1B100161143V4	4.2968	4.6047	4.5407	4.89936	6.6919	6.4596	6.60758
ASMM10LNC1A101122444V4	6.91092	6.52349	6.36558	6.65426	6.78492	6.83254	6.5176
ASMM10LNC1A103648889V4	5.28376	5.21337	4.86647	5.50928	5.55325	5.50581	5.58633
ASMM10LNC1A109795706V4	4.68159	5.20917	5.14906	4.87064	4.86607	4.96664	5.00093
ASMM10LNC1A108676142V4	12.4515	12.7955	13.7126	11.3866	9.59032	9.65194	9.79078
ASMM10AP1B110058501V4	5.09958	4.95859	5.01824	4.96408	4.54637	5.12012	5.15332
ASMM10P051204V4	7.81625	7.52645	7.66938	7.57911	7.97585	8.16158	8.34646
ASMM10AP1B121238245V4	6.41068	6.26133	6.17479	6.68651	6.93445	6.70616	6.80715
ASMM10LNC1A103448571V4	10.9846	10.8434	10.832	10.9721	9.82004	9.78931	9.83907
ASMM10AP1B100202136V4	2.42774	2.37482	2.34951	2.35039	2.32254	2.3219	2.32205
ASMM10AP1B106704062V4	9.27805	9.34565	9.68563	8.96805	8.7913	8.67741	8.95581
ASMM10LNC1A100085765V4	5.44362	5.68476	5.2252	6.1504	4.67988	5.20205	5.26618
ASMM10AP1B100197795V4	13.2953	13.2106	13.2027	13.5375	13.8877	13.6763	13.8821
ASMM10LNC1A100004711V4	9.45249	9.63755	9.57449	9.59806	7.34886	7.25623	7.43943
humanlincRNA2213-_P1V4	4.15074	4.14773	4.02207	4.73853	4.87882	5.06697	4.96692
ASMM10LNC1A103647779V4	7.2583	7.06395	7.31838	7.63298	7.87074	7.74616	7.78896
ASMM10LNC1A100058622V4	2.42774	2.37482	2.34951	2.35039	2.32254	2.3219	2.32205
ASMM10LNC1A108677452V4	3.5584	2.96541	3.32732	3.87454	2.35846	2.34464	2.75323
ASMM10LNC1A115256320V4	7.20826	7.07158	7.08209	7.34669	7.87137	7.74284	8.02644
ASMM10LNC1A110676974V4	6.7088	6.48767	6.44121	6.67713	6.58602	6.74732	6.68686
ASMM10AP1B112943999V4	4.33107	3.99459	4.63792	4.65598	5.40227	4.85165	4.8724
ASMM10LNC1A100073887V4	2.42774	2.37482	2.34951	2.35039	4.30161	3.08489	3.14427
ASMM10LNC1A103292016V4	7.44608	7.02464	7.10871	7.11466	8.37428	8.4562	8.32959
ASMM10AP1B103417283V4	2.42774	2.37482	2.34951	2.53656	4.34796	4.35155	4.27911
ASMM10LNC1A110298022V4	5.83133	6.02064	5.95814	5.98709	5.86834	5.58824	5.9286
ASMM10UP865V4	2.42774	2.37482	2.34951	2.35039	2.32254	2.3219	2.32205
ASMM10AP1B119554111V4	4.82658	5.01859	5.18835	4.69149	3.73437	4.08932	3.03208
ASMM10AP1B118540170V4	5.22073	5.2447	4.82773	5.30225	5.41714	5.51688	5.22166
ASMM10AP1B106365093V4	11.5455	11.8002	11.7628	11.1049	11.4245	11.3289	11.6634
ASMM10LNC1A100026599V4	2.42774	2.37482	2.34951	2.74623	2.32254	2.58566	2.60146
ASMM10AP1B100188066V4	9.7505	9.66283	9.5768	9.81552	10.0698	9.94193	9.66172
ASMM10LNC1A101393477V4	6.63737	6.40571	6.34974	6.7256	7.04078	6.95241	6.85675
humanlincRNA0638-_P1V4	4.95608	5.47258	5.09691	5.14245	4.75381	4.24327	4.52729
ASMM10LNC1A100068448V4	8.63784	8.63457	8.635	8.75763	8.2419	8.29505	8.09636
ASMM10AP1B100125763V4	9.2455	9.12056	9.56606	9.73632	10.3109	10.7553	10.6905
ASMM10AP1B102937073V4	8.58174	8.56544	8.72053	8.18478	8.88422	8.92118	8.49286
ASMM10AP1B100200027V4	11.5104	12.6329	12.0971	11.5971	13.4211	13.3475	13.2297
ASMM10P039244V4	2.42774	2.37482	2.34951	2.35039	2.34849	2.3219	2.32205
ASMM10AP1B105974409V4	5.24094	5.06836	5.26686	4.88919	5.41294	5.968	5.06177
ASMM10AP1B111303735V4	10.5197	10.3627	10.5868	10.6657	10.9956	10.8755	10.6592
ASMM10LNC1A100321427V4	7.46978	7.652	7.38521	7.56109	6.69077	6.74753	6.0122
ASMM10LNC1A101614437V4	6.44548	6.93668	7.10769	7.17435	7.25182	7.12993	6.9147
ASMM10P050544V4	7.4223	7.19254	7.2732	8.03613	8.58516	8.54728	8.6589
ASMM10UP470V4	4.02096	3.93735	3.26484	3.75384	5.16548	4.76271	3.9935
ASMM10LNC1A100010109V4	5.08699	5.15322	5.35274	4.68588	6.34094	6.26106	6.86851
ASMM10LNC1A108178218V4	4.89145	5.24858	4.66412	5.02963	4.54492	4.37218	4.18179
ASMM10P046845V4	3.71566	4.46145	3.44927	3.30368	3.47927	3.69659	2.4466
ASMM10P055887V4	5.08005	5.40041	5.56147	5.32166	5.92552	5.93715	5.25882
ASMM10LNC1A102178938V4	12.5071	12.3546	12.6224	12.1176	13.4984	13.8131	13.6537
ASMM10AP1B103728132V4	12.685	12.827	12.3254	12.192	12.9191	13.4267	13.0001
ASMM10AP1B100118216V4	6.52469	6.27483	6.45216	7.3884	6.80131	6.90997	6.95017
ASMM10P048128V4	11.4662	11.7822	11.425	11.417	9.95533	10.3513	10.0973
ASMM10LNC1A103659285V4	2.42774	2.37482	2.34951	2.35039	2.32254	2.3219	2.32205
ASMM10LNC1A100012248V4	6.31765	6.55711	5.55729	6.22041	5.62386	5.13259	5.64297
ASMM10AP1B114731110V4	8.2117	7.46437	7.82868	8.17546	10.4223	10.1772	9.9782
ASMM10LNC1A107655919V4	4.06121	4.52195	4.34258	4.37721	3.77481	4.25094	3.11671
ASMM10AP1B100145739V4	11.0815	11.7393	11.1326	11.7433	12.2231	12.564	12.6821
ASMM10AP1B120224266V4	5.30015	5.26377	5.19821	5.6762	5.31002	5.44109	4.78619
ASMM10AP1B100192637V4	5.63957	5.95341	5.81309	5.94026	6.2556	6.19189	6.23202
ASMM10AP1B100115681V4	3.62868	3.51882	3.48743	3.89973	3.84705	3.14862	3.9569
ASMM10P016164V4	2.42774	2.37482	2.34951	2.35039	3.30467	2.62875	2.41153
ASMM10AP1B100142752V4	7.31811	7.45968	7.69945	7.63909	9.2762	9.03454	9.07771
ASMM10AP1B118283139V4	7.83068	7.55513	8.44467	6.64077	8.63477	8.8851	8.91229
ASMM10LNC1A107514234V4	6.07702	5.70533	5.801	6.03705	7.17267	7.46911	7.27107
ASMM10AP1B104496249V4	3.85877	3.31529	3.47782	3.95603	4.79901	4.68637	4.7598
ASMM10P058092V4	6.7678	6.77391	6.61442	6.52382	5.18683	5.28989	5.22729
ASMM10LNC1A109066682V4	5.51433	5.23513	5.63081	5.62303	6.10332	5.81441	5.72717
ASMM10LNC1A100109714V4	4.61971	3.93697	5.89629	4.89974	4.12693	3.56351	4.39977
ASMM10AP1B112241749V4	2.42774	2.37482	2.34951	2.78954	2.40349	3.7693	3.21802
ASMM10LNC1A100653532V4	6.04019	6.06961	5.92546	6.62364	5.15537	5.37688	5.03833
ASMM10AP1B124043019V4	7.50084	7.97996	7.21534	8.27478	7.70102	7.76115	7.68144
ASMM10LNC1A100036656V4	4.95141	4.32034	4.41853	4.59836	3.64554	3.93175	4.26398
ASMM10AP1B115568980V4	5.55903	5.70403	5.35917	5.43154	5.35514	4.71331	5.03873
ASMM10AP1B126856562V4	4.46906	3.62081	3.15217	3.92123	3.89422	3.76965	3.9452
ASMM10P058187V4	5.93474	5.55718	5.95327	6.60553	6.62157	6.18761	6.57062
ASMM10AP1B115127877V4	6.72624	6.80543	7.02279	7.59891	8.07382	7.47016	7.95825
ASMM10LNC1A100047591V4	5.43522	5.41694	5.60318	5.83659	5.74617	5.55358	5.49853
ASMM10AP1B102570518V4	9.85691	9.54461	9.6809	9.86128	11.1063	11.5163	11.2416
ASMM10AP1B127613047V4	6.12439	6.05534	6.23791	6.15375	6.62141	6.31308	6.60496
ASMM10AP1B113230164V4	6.89285	6.90948	6.93936	6.64548	6.00041	6.26806	6.14573
ASMM10AP1B119765201V4	5.71893	5.21498	5.41315	5.64997	6.35549	6.12233	6.02026
ASMM10LNC1A103662362V4	5.76888	5.94366	5.62568	6.15945	5.13997	5.10328	4.64364
ASMM10LNC1A100042526V4	2.42774	2.37482	2.56744	2.79332	3.83653	3.09276	2.97258
ASMM10LNC1A110323450V4	6.72463	6.71293	6.87195	6.73387	8.47451	8.77186	8.78332
ASMM10AP1B100962721V4	9.95495	9.915	9.9875	10.1749	9.95025	9.78103	9.93247
ASMM10AP1B100135289V4	6.57897	6.39902	6.48067	6.84144	5.88333	5.69468	5.86569
ASMM10LNC1A106481268V4	8.02071	7.36272	7.65169	7.90832	7.09167	6.96329	6.84469
ASMM10LNC1A107823784V4	16.5066	16.4946	16.547	16.6751	16.2035	16.2204	16.2773
ASMM10P028586V4	2.42774	2.37482	2.82112	2.35039	2.32254	2.3219	2.32205
ASMM10AP1B119831029V4	8.04347	7.87755	7.88825	7.74991	8.50804	8.58236	8.70947
ASMM10P025513V4	6.06547	5.93986	5.84189	5.8196	5.15396	5.48059	5.41907
ASMM10AP1B118592990V4	10.806	11.011	11.0059	10.8601	9.9192	10.0192	9.9681
ASMM10LNC1A100121674V4	14.5108	14.3955	14.4604	14.5563	12.6899	12.4336	12.4336
ASMM10LNC1A109646751V4	4.35092	4.36917	3.8456	4.31034	5.76535	4.77681	5.21618
ASMM10AP1B106432971V4	7.21099	6.98548	6.98238	7.10398	6.42897	6.31645	6.74133
ASMM10P026598V4	8.04022	7.92654	7.94329	7.99802	7.73335	7.92572	7.99515
ASMM10AP1B100041994V4	5.0887	4.94216	5.52957	4.76491	4.41242	3.90354	4.57117
ASMM10LNC1A100026381V4	2.42774	2.37482	2.34951	2.35039	2.32254	2.3219	2.32205
ASMM10AP1B100030997V4	14.052	14.1218	14.3094	13.9474	14.7332	14.6911	14.8425
ASMM10AP1B119294205V4	8.50643	8.07689	8.91838	8.17142	9.14772	9.80235	9.55591
ASMM10LNC1A114061334V4	4.78317	5.05631	4.87483	5.17088	5.44863	5.46563	5.42243
ASMM10LNC1A100015473V4	9.81741	10.2333	9.76172	9.62497	8.59558	8.36223	8.42887
ASMM10AP1B123291386V4	5.6375	5.20014	5.24798	5.49268	5.38371	5.27154	5.67478
ASMM10AP1B110639375V4	3.89081	3.75836	3.91838	3.95251	3.94611	3.69907	3.43566
ASMM10LNC1A107656311V4	13.5637	13.2611	13.3509	13.5015	11.8679	11.5281	11.2941
ASMM10AP1B114707637V4	15.572	16.4558	17.2242	13.2611	13.2836	13.5015	14.274
ASMM10LNC1A112191998V4	7.46202	7.12676	7.33276	7.14795	7.69727	7.27524	7.71797
ASMM10LNC1A100127513V4	7.38728	7.16156	7.8471	6.25692	8.73243	8.58224	8.86324
ASMM10LNC1A114310464V4	7.82608	7.83004	7.50747	7.81488	8.52646	8.51678	8.57031
ASMM10LNC1A106650542V4	5.90697	5.84669	5.86905	5.91474	5.76179	5.54841	5.5976
ASMM10LNC1A102499693V4	5.04638	5.13697	4.83132	4.57549	3.81843	4.23052	4.43316
ASMM10P034299V4	9.26884	9.64905	9.23004	9.56995	7.55764	7.63669	7.88161
ASMM10AP1B102756748V4	11.249	10.9627	11.0666	10.9543	12.2537	12.5864	12.4673
ASMM10AP1B100108283V4	9.08219	9.28829	8.91114	8.95352	9.30041	9.12316	9.38694
ASMM10LNC1A100010327V4	4.01773	3.93581	4.05521	3.5823	3.01025	3.13424	3.26087
ASMM10LNC1A108646342V4	6.13962	5.67225	6.04194	6.03934	5.51178	5.5892	5.84171
ASMM10LNC1A100101110V4	8.22011	8.37293	8.02802	8.41106	6.53705	6.37682	6.54974
ASMM10P034441V4	8.00594	8.19274	7.79685	8.39255	7.55346	7.28219	7.47397
ASMM10LNC1A104376883V4	8.32632	8.14764	8.17648	8.18027	8.57291	8.91506	8.84393
ASMM10LNC1A100480456V4	5.23849	5.15469	5.20674	5.38053	5.14368	3.88823	4.42724
ASMM10LNC1A100064676V4	3.53347	4.37752	3.66997	4.04485	2.93039	2.41623	3.23488
ASMM10UP835V4	2.9775	3.86628	3.09762	4.08648	3.5454	2.67612	2.53359
ASMM10AP1B119969056V4	6.37134	6.30579	6.55065	6.40571	8.21424	7.22419	7.52519
ASMM10AP1B114942738V4	15.0411	14.9192	14.5407	15.0584	12.9137	13.1547	13.0695
ASMM10LNC1A112455455V4	11.6395	11.9473	12.0585	11.8598	10.9315	10.7253	11.0546
ASMM10LNC1A110894932V4	7.03807	6.91269	6.93619	7.27107	6.68686	6.83303	6.71484
ASMM10AP1B110398953V4	9.30777	9.09071	8.92262	9.66773	10.438	10.6246	10.7831
ASMM10LNC1A100111518V4	7.20788	8.12783	7.73914	7.09562	5.22849	5.24353	5.21307
ASMM10AP1B111503105V4	2.42774	3.1995	2.98827	2.78439	3.27927	2.39922	2.36293
ASMM10AP1B106041271V4	2.89381	2.37482	2.62771	2.60356	3.35579	3.10596	3.1678
ASMM10AP1B120636880V4	6.71173	6.66094	6.71698	6.64667	6.26114	6.2582	6.7803
ASMM10LNC1A114766562V4	8.54062	8.43714	8.2012	8.8581	7.99453	8.18881	8.2588
ASMM10LNC1A100041932V4	9.68824	9.42752	9.46363	9.76291	8.79854	8.66285	8.95655
ASMM10LNC1A100717274V4	5.96139	5.753	5.83197	5.95362	5.09	5.06592	5.32244
ASMM10AP1B100203104V4	9.35498	9.42686	9.48709	9.65329	7.86287	7.92352	8.04519
ASMM10AP1B124788332V4	5.08474	5.91069	6.00941	5.74858	5.05858	5.24207	4.90134
ASMM10LNC1A110677020V4	3.75684	3.84225	3.91822	4.42465	4.43127	4.83737	4.7259
ASMM10AP1B117226290V4	10.385	10.2753	10.2776	9.88643	11.2595	11.2077	11.5056
ASMM10P017800V4	4.75252	4.94322	4.94873	4.88329	3.77258	4.38708	4.24302
ASMM10LNC1A108855685V4	7.10398	7.41086	7.158	7.03457	7.09007	7.62218	7.54514
ASMM10LNC1A111953778V4	8.04389	8.03655	8.03837	8.22247	8.79665	8.75663	8.99729
ASMM10AP1B100075985V4	7.32935	8.72078	8.67195	7.4091	7.15106	7.29934	7.76544
ASMM10AP1B113578445V4	14.2107	14.1694	14.1916	14.0707	13.1885	12.95	13.0481
ASMM10AP1B100265394V4	6.97272	6.86269	6.7924	6.90221	6.91939	6.83344	6.97542
ASMM10LNC1A110550083V4	3.26987	3.37078	3.47821	2.87921	3.28007	2.86788	2.99861
ASMM10LNC1A108000233V4	7.77217	7.65298	8.20082	6.22319	10.0618	9.53157	10.506
ASMM10AP1B107882591V4	9.76623	9.66716	9.75068	9.86818	9.2054	9.36633	9.44479
ASMM10LNC1A100096006V4	2.42774	2.37482	2.34951	2.35039	2.32254	2.89571	2.91921
ASMM10AP1B100007025V4	9.7978	9.92272	9.86199	9.44479	11.2954	11.0772	11.3379
ASMM10LNC1A100116919V4	4.24513	4.09868	4.60128	3.88259	5.51257	4.93492	5.02233
ASMM10AP1B118209379V4	5.27261	5.06449	4.82504	5.56248	6.10014	5.92477	6.15229
ASMM10LNC1A100074280V4	5.79346	6.26228	5.82991	5.95396	4.90119	4.6965	4.47055
ASMM10LNC1A102367732V4	7.67347	7.50811	7.64531	7.60457	7.51896	7.73722	7.173
ASMM10LNC1A100021245V4	7.58448	7.33989	7.78279	8.36778	8.02457	8.1694	8.17963
ASMM10P047322V4	3.07827	3.63141	3.38372	3.43763	4.29171	4.10064	4.37541
ASMM10AP1B120085561V4	3.44927	3.61085	3.11336	2.63622	5.19929	4.91004	4.71443
ASMM10LNC1A100064010V4	2.42774	2.37482	2.34951	2.35039	4.59584	4.05134	3.77497
ASMM10AP1B100081717V4	4.71397	4.03488	5.97304	4.51005	4.7642	5.24283	5.91939
ASMM10AP1B100353100V4	10.67	10.5914	10.8609	11.4971	11.1864	11.5381	11.5754
ASMM10LNC1A106882919V4	9.41174	9.46735	9.2408	9.56246	9.57927	9.54528	9.68129
ASMM10LNC1A103640873V4	5.59133	5.69107	5.34735	5.62829	5.14804	5.59395	5.60234
ASMM10LNC1A113155938V4	7.53151	7.68152	7.1622	7.24037	7.7132	7.98432	7.86305
ASMM10LNC1A100058212V4	9.92146	9.82317	9.89819	10.1596	9.48402	9.3389	9.2762
ASMM10LNC1A100111256V4	2.42774	2.37482	2.34951	2.35039	2.863	3.23228	3.82352
ASMM10LNC1A101630894V4	5.49155	5.671	5.47534	5.84496	5.83696	5.9677	6.38337
ASMM10AP1B101353708V4	10.6378	10.1731	10.6855	9.81741	11.9923	12.3214	12.1515
ASMM10LNC1A102654970V4	11.8218	11.4994	11.8863	11.7242	13.3675	13.0171	13.5839
ASMM10AP1B100084235V4	8.25579	8.17063	8.28365	8.34161	8.90114	8.89308	8.78883
ASMM10LNC1A100053304V4	3.19117	3.67373	2.95326	3.72722	4.91745	4.66764	4.55435
ASMM10AP1B126788064V4	9.5825	8.9586	8.78683	9.40774	9.3432	9.28626	9.05689
ASMM10AP1B100090556V4	7.93245	8.05773	8.32752	7.61769	9.45929	9.18737	10.0911
ASMM10AP1B100135609V4	4.47881	4.39729	4.7486	4.50842	2.8153	3.19923	2.73977
ASMM10P057595V4	11.6856	11.6593	11.4678	11.7363	10.44	10.2582	10.1627
ASMM10AP1B107160184V4	5.10215	4.40728	4.81562	5.21675	3.5442	3.48447	2.956
ASMM10LNC1A109101207V4	5.45929	5.85337	5.47116	5.64032	6.09153	5.9969	5.8105
ASMM10AP1B100059106V4	5.25803	5.24329	7.02292	5.61744	6.69688	5.72795	7.78828
ASMM10P058054V4	14.2278	14.6775	14.1189	14.4018	10.993	11.2568	10.9501
ASMM10LNC1A100075371V4	9.81362	10.0449	9.57397	9.603	9.0602	8.98961	8.74402
ASMM10LNC1A100021603V4	7.51349	7.50676	6.86534	7.2415	5.55647	5.88077	5.7196
ASMM10AP1B112679706V4	8.32959	7.99103	8.37183	8.27119	8.10997	8.26234	8.11771
ASMM10AP1B108541147V4	6.86141	6.85871	6.84321	6.84646	6.54691	6.72999	6.21432
ASMM10AP1B113507500V4	16.3143	16.4106	16.2685	16.378	16.2461	16.2817	16.2402
ASMM10LNC1A100176091V4	9.21466	9.56995	9.57873	9.07855	8.33476	8.35659	8.06756
ASMM10LNC1A100121504V4	9.83555	9.9815	9.89009	9.73406	8.76345	8.85602	8.79554
ASMM10P012970V4	4.79423	4.86661	5.39973	4.74398	4.73469	4.9929	5.08518
ASMM10LNC1A113426555V4	6.80955	6.1013	6.37285	6.78111	7.25842	6.82821	6.71173
ASMM10LNC1A101372700V4	7.88238	7.71343	7.8568	8.22445	9.40177	9.23064	9.1914
ASMM10LNC1A115551707V4	8.71136	8.56066	8.4931	8.44305	10.1117	10.1705	10.0836
ASMM10AP1B108477393V4	7.58183	7.5617	7.51458	7.38878	7.92084	8.09506	7.42552
ASMM10AP1B100083104V4	4.4228	4.86184	4.18879	4.90879	3.55985	2.3219	2.32205
ASMM10P017515V4	4.65665	5.12302	4.31565	4.59422	4.31046	4.15942	4.67301
ASMM10LNC1A109540290V4	8.50603	8.674	8.47631	8.17705	8.3636	8.34202	8.2254
humanlincRNA1607-_P1V4	4.10855	4.1271	3.07194	4.34434	3.7187	4.17003	3.96064
ASMM10LNC1A112149224V4	3.47518	3.29073	3.23827	3.4407	5.65005	5.25646	4.95327
ASMM10AP1B102208712V4	9.89833	10.0764	10.075	9.98209	9.44289	9.41241	8.6426
ASMM10P056346V4	2.42774	2.37482	2.98114	2.57794	2.95765	2.61664	2.78072
ASMM10P050339V4	3.9976	4.11634	3.97356	4.07108	4.4428	4.39257	4.32282
ASMM10LNC1A103223329V4	9.72161	9.43524	9.49378	9.47479	10.4938	10.5067	10.2324
ASMM10AP1B101699382V4	7.05016	7.12516	7.17267	7.08802	8.28686	8.07169	8.31651
ASMM10AP1B102328046V4	3.21398	2.93236	3.91306	2.94395	3.22998	4.07815	2.32205
ASMM10LNC1A102156454V4	2.42774	2.37482	2.8232	2.5972	4.04185	3.9086	3.26537
ASMM10LNC1A103000242V4	4.47347	4.34258	4.47431	4.60092	3.92155	4.33257	3.37834
ASMM10LNC1A107199014V4	8.87448	8.62925	8.98749	8.8967	8.37999	8.61374	8.78928
ASMM10P032912V4	9.63965	10.0508	9.54202	9.95188	6.81794	6.96075	6.89011
ASMM10AP1B108686204V4	12.1117	11.8875	12.231	11.9794	13.5485	14.0197	13.7654
ASMM10LNC1A113720582V4	9.05806	9.63161	9.51714	9.18843	8.31727	8.27478	8.25302
ASMM10AP1B101800043V4	3.55098	3.1849	3.47701	2.66061	3.78464	4.32867	3.76378
ASMM10LNC1A110743734V4	6.62762	6.67931	6.44369	6.81146	4.81535	4.48085	4.49465
ASMM10LNC1A100209365V4	5.46861	5.24255	5.51247	5.32016	5.33923	5.51888	5.45481
ASMM10LNC1A115120263V4	7.27386	7.21799	7.48536	7.2777	6.68632	6.62425	6.63881
ASMM10P025368V4	6.13845	6.11433	6.0344	7.07637	6.63053	6.62403	6.71411
ASMM10AP1B116659989V4	8.877	8.7293	9.05067	8.97525	9.40845	9.14356	8.93974
ASMM10P056551V4	3.59577	3.65108	3.02366	2.95728	4.39395	4.21596	4.31209
ASMM10LNC1A100026012V4	6.22447	6.18241	6.23589	6.62148	8.07215	7.8569	7.86908
ASMM10AP1B105474312V4	7.29073	2.37482	7.29583	7.23146	7.64199	7.86739	7.88365
ASMM10AP1B117432506V4	10.4676	10.3357	10.4565	10.8465	10.3888	10.4618	10.4154
ASMM10AP1B100083565V4	10.7384	10.6926	10.7232	10.722	10.0652	10.0728	10.0803
ASMM10AP1B124103308V4	9.031	8.59314	8.42428	9.26264	8.92384	8.92799	8.83701
ASMM10LNC1A107645620V4	4.62834	4.51518	4.88185	4.74068	5.48699	5.43445	5.69906
ASMM10UP604V4	4.10659	3.60951	4.26494	3.49814	2.87197	3.28554	2.97015
ASMM10LNC1A112951663V4	6.05808	6.81839	6.81455	5.76647	5.67769	5.75016	5.92425
ASMM10LNC1A100111611V4	3.06471	3.46744	2.70634	2.35039	2.49287	2.3687	2.32205
ASMM10LNC1A105124593V4	7.77931	7.57054	7.82752	8.36791	7.12025	7.00849	6.85494
ASMM10AP1B116436561V4	13.3115	13.5308	13.8983	13.4437	14.711	14.9508	14.8673
ASMM10LNC1A103368300V4	8.68603	8.24015	8.00351	9.70958	7.3832	7.69061	7.48556
ASMM10AP1B102224873V4	11.1848	10.3259	9.7409	10.2369	9.45422	9.21417	9.24775
ASMM10LNC1A100010681V4	2.42774	2.37482	2.34951	2.35039	5.71186	4.65085	4.88193
ASMM10P038956V4	7.53847	7.20274	7.53839	7.91634	8.06854	8.18964	8.24523
ASMM10LNC1A100047672V4	5.97815	5.61431	5.75671	5.92353	6.52915	6.63898	6.46963
ASMM10AP1B106643222V4	4.57923	5.17462	4.98427	5.16833	6.01419	5.96139	5.86873
ASMM10AP1B119470300V4	4.86038	4.80293	4.98635	5.04958	5.80077	5.753	5.66708
ASMM10P039349V4	4.80656	5.79239	4.88114	5.925	3.241	4.1293	3.46744
ASMM10LNC1A116205091V4	3.6225	2.37482	3.66423	3.64399	3.69392	3.24511	3.3921
ASMM10P056240V4	7.11856	6.88964	7.00611	7.91907	8.38507	8.37227	8.69649
humanlincRNA2438-_P1V4	6.04636	5.71964	5.67061	5.80913	5.49695	5.81424	5.70655
ASMM10LNC1A102796775V4	7.57537	7.52968	7.40401	7.30499	6.5447	6.78804	6.55681
ASMM10UP660V4	4.92789	6.03023	5.86929	4.28721	3.98683	3.72605	4.40414
ASMM10AP1B100180042V4	10.5297	10.4252	10.7945	10.2106	8.98583	8.94863	8.96869
ASMM10AP1B104618896V4	5.7138	5.41061	5.52489	5.39383	7.12815	7.19962	7.10948
ASMM10P037230V4	2.42774	2.37482	2.34951	2.58681	2.45945	2.3219	2.32205
ASMM10AP1B103089104V4	13.4424	13.4625	14.0657	13.6602	12.2046	12.1591	12.231
ASMM10AP1B102369006V4	8.20449	7.94241	7.34717	8.07764	7.7459	7.65839	7.49352
ASMM10LNC1A103669621V4	4.94159	4.75236	4.64115	3.93581	4.22771	3.94478	3.29333
ASMM10AP1B112817795V4	7.36628	7.05747	7.32487	7.06765	8.66536	8.97525	8.66993
ASMM10LNC1A112171119V4	4.65879	4.33932	4.94846	5.10215	5.83162	5.71139	5.71784
ASMM10P016631V4	6.2822	6.14781	6.26497	6.27399	5.64372	5.9192	6.01975
ASMM10LNC1A102659852V4	4.29989	3.69794	3.02461	4.01773	4.91769	3.80308	4.05028
ASMM10AP1B101485789V4	8.40246	8.37272	8.16919	8.44452	7.66381	7.7061	7.73394
ASMM10AP1B119179278V4	12.663	12.4686	12.6827	12.8849	11.7974	12.0875	11.9693
ASMM10LNC1A101747540V4	5.68683	5.37126	6.17368	5.0099	6.60863	6.5676	6.69072
ASMM10LNC1A100073884V4	4.64219	4.8952	4.67218	4.85694	5.30481	4.73938	4.30628
ASMM10LNC1A100042619V4	8.56326	8.33248	8.67249	8.79936	8.47436	8.38306	8.5035
ASMM10AP1B118665413V4	6.44453	6.00745	6.64341	6.27156	7.85251	8.16356	7.87224
ASMM10LNC1A100057828V4	4.86147	4.81451	4.52103	4.78629	5.38718	5.01699	4.98449
ASMM10AP1B100128038V4	6.73712	6.62655	6.11325	6.18144	7.0955	7.43012	7.36114
ASMM10AP1B100041007V4	3.32005	2.6651	3.3924	3.70005	3.01409	2.3219	2.34637
ASMM10AP1B107780861V4	9.57281	9.28413	9.07136	10.1486	10.5225	10.7461	10.547
ASMM10UP074V4	8.12424	7.93245	8.01247	8.11292	8.97919	8.44571	8.89289
ASMM10AP1B100204117V4	5.86698	5.5733	5.88716	5.70696	6.23023	6.33054	6.17098
ASMM10LNC1A100115657V4	8.17587	8.52054	8.4523	8.22115	8.04613	7.85007	7.90335
ASMM10AP1B116255196V4	5.0286	4.85729	5.1226	5.22412	4.52645	4.12191	4.44555
ASMM10LNC1A107145462V4	3.11212	3.30926	3.30009	3.44123	2.52335	2.4467	3.3861
ASMM10LNC1A103847215V4	6.88414	6.91037	6.79639	6.77173	6.1741	6.08156	6.13817
ASMM10LNC1A105649011V4	3.26087	2.84675	3.88453	2.35039	3.12263	3.08515	3.49743
ASMM10P023750V4	5.38017	5.29913	5.38435	5.41016	4.90255	5.22948	4.63483
ASMM10AP1B110667612V4	4.76563	4.47119	4.21549	4.52993	4.97268	4.86672	4.91291
ASMM10P046599V4	5.57866	5.23076	5.2544	5.91257	5.7719	5.75853	5.71225
ASMM10LNC1A107549555V4	2.42774	2.37482	2.34951	2.35039	2.43311	2.46378	2.47933
ASMM10P045481V4	7.22406	6.84934	7.12815	6.68763	7.66468	7.74641	7.82088
ASMM10P017344V4	6.60665	6.51465	6.42739	6.73782	5.78809	5.83339	5.84579
ASMM10AP1B111225241V4	7.30819	7.04284	8.06682	6.97048	7.89287	7.82982	7.95816
ASMM10AP1B108954607V4	8.55322	8.31983	8.37257	8.712	8.58097	8.49522	8.49838
ASMM10LNC1A100042616V4	4.94226	4.87315	4.88253	4.94743	2.52819	2.54896	3.06758
ASMM10LNC1A113548124V4	5.7279	5.5617	5.39504	5.99319	5.22169	5.33995	4.75209
ASMM10LNC1A110657053V4	6.75478	6.76042	6.92577	6.43901	7.81084	7.81722	7.88607
ASMM10AP1B124813836V4	4.70833	4.74075	4.1373	3.98189	3.94266	3.84081	4.55282
ASMM10LNC1A103470381V4	7.43617	7.4618	7.23071	7.42344	8.23109	8.25722	8.12327
ASMM10AP1B113452879V4	6.90027	6.7049	6.4653	6.88568	7.79272	7.93758	7.99222
ASMM10AP1B100098900V4	2.42774	2.37482	2.75779	2.35039	2.32254	4.3872	3.31653
ASMM10LNC1A109666107V4	9.30284	9.30084	9.15136	9.13409	7.26189	7.24498	7.32983
ASMM10P031891V4	7.12764	7.3379	6.89117	6.8693	6.66003	6.93562	7.14635
ASMM10AP1B104733600V4	4.63471	4.69103	4.92834	4.69823	4.35439	4.2055	4.34908
ASMM10AP1B118911651V4	8.13501	7.96815	8.20768	7.97567	8.33576	8.1515	8.26314
ASMM10LNC1A100084111V4	13.8863	14.5356	13.2332	14.5812	12.5196	12.3045	12.1662
ASMM10AP1B123819893V4	4.63341	4.50224	4.57117	4.73645	5.87673	5.20144	5.24088
ASMM10LNC1A110601563V4	8.10421	8.23887	8.51049	8.31008	7.25496	7.40022	7.7364
ASMM10P032851V4	10.1528	10.286	10.0471	10.3145	5.67253	5.36907	5.48972
ASMM10P056482V4	3.65755	3.93872	3.05859	3.35315	2.63669	2.78241	3.01068
ASMM10LNC1A107126742V4	9.10816	8.95324	9.50476	9.37273	8.32452	8.27039	8.5445
ASMM10LNC1A106167563V4	4.87468	4.64498	4.55435	4.7922	5.02719	3.66493	4.47326
ASMM10AP1B112810373V4	6.39213	8.67119	8.56585	6.48277	5.33142	5.06369	5.39182
ASMM10LNC1A103644606V4	8.15683	8.67362	8.99558	8.60273	8.24055	8.719	9.03429
ASMM10P058182V4	4.34742	4.24025	2.95094	4.14496	4.64167	4.05464	3.65597
ASMM10UP298V4	2.42774	2.94433	2.54754	3.59908	2.46092	2.3219	2.57453
ASMM10LNC1A101642672V4	5.69115	5.73513	5.71601	5.62658	4.66493	4.65076	4.60302
ASMM10LNC1A106840586V4	9.90681	9.81312	10.0036	10.1448	10.0353	9.81312	9.9845
ASMM10AP1B113250305V4	8.37093	9.37815	9.27091	8.41356	7.64493	7.59811	7.84338
ASMM10AP1B115258856V4	7.6555	7.60698	7.48084	7.98886	7.98899	8.00602	8.2607
ASMM10LNC1A109374001V4	6.04962	5.86729	5.76113	5.772	7.37358	7.43153	7.46437
ASMM10LNC1A100058031V4	5.28846	5.84857	5.17026	5.57041	4.23572	4.53501	4.92275
ASMM10AP1B119417208V4	4.09729	3.64299	4.77975	4.12655	4.61023	4.10891	5.09579
ASMM10LNC1A110989452V4	9.98796	10.1763	9.70435	10.6583	9.92456	9.64063	9.87418
ASMM10LNC1A100073890V4	6.1609	6.25781	6.46443	6.26762	6.05715	6.08459	6.42324
ASMM10LNC1A100016375V4	8.70271	9.0811	8.56561	8.80545	7.86312	7.6709	7.87074
ASMM10P044752V4	7.12284	7.1374	6.19182	7.12455	2.32254	2.3219	2.32205
ASMM10LNC1A100005392V4	2.42774	2.37482	2.34951	2.35039	3.69069	2.41808	2.89381
ASMM10LNC1A106671433V4	7.23447	7.51728	7.4422	7.61382	8.47303	8.28445	8.61877
ASMM10LNC1A110812187V4	6.23017	6.17019	6.05953	6.08426	7.0343	7.38078	7.30258
ASMM10AP1B115088774V4	3.44645	4.19583	3.54388	3.96899	4.10717	3.77269	4.22944
ASMM10P057747V4	4.71674	5.32524	5.11071	5.36665	4.02246	4.68712	5.04374
ASMM10LNC1A104172056V4	8.11609	8.62188	7.87291	8.15585	6.66772	6.77218	6.83666
ASMM10P050443V4	3.48572	3.96108	3.59095	3.38756	2.38113	2.47283	2.78954
ASMM10LNC1A100117062V4	4.30958	4.68159	4.54368	4.66677	2.68974	3.84199	4.17013
ASMM10AP1B106502756V4	5.39973	5.52154	5.0373	5.83968	5.31576	5.60433	5.55601
ASMM10LNC1A111670805V4	5.70613	5.96933	5.75725	5.70762	6.15186	5.70287	6.22847
ASMM10LNC1A109081183V4	6.16427	6.15206	6.05815	6.13687	6.69391	6.48664	6.52337
ASMM10P057548V4	12.5936	12.8243	12.4819	12.7229	13.0807	13.3081	13.1934
ASMM10LNC1A112183215V4	7.49268	7.59612	7.2743	7.78117	6.62251	6.62468	6.55414
ASMM10LNC1A103244816V4	6.8802	6.74745	7.11766	7.4924	4.93811	5.4981	5.76661
ASMM10AP1B100032146V4	10.7992	10.9402	10.946	11.2681	11.3503	11.0868	11.4832
ASMM10LNC1A105676517V4	2.42774	2.37482	2.34951	2.35039	2.32254	2.38023	2.49458
ASMM10LNC1A100068486V4	6.16767	6.72042	6.03715	5.9074	3.44514	3.88138	3.90568
ASMM10LNC1A109995340V4	7.02079	7.10748	6.57913	7.7451	6.83365	7.05371	7.07326
ASMM10LNC1A100036800V4	7.58508	7.71684	7.68321	7.95073	8.41988	8.37293	8.43787
ASMM10AP1B116311250V4	4.29913	4.43601	3.71206	4.47678	3.52843	2.36274	3.69353
ASMM10LNC1A104567598V4	4.78974	4.26074	3.86829	4.8356	5.20862	5.23355	5.09939
ASMM10P014472V4	3.88394	3.93414	4.39382	4.37616	3.48243	3.85637	4.24214
ASMM10LNC1A113328676V4	5.24353	4.85558	5.05968	5.36968	5.89232	5.82672	5.29988
ASMM10LNC1A100526719V4	5.31528	5.47895	5.29011	5.65257	6.4722	5.8591	6.26743
ASMM10LNC1A113740785V4	5.75274	5.34111	5.48301	5.62314	6.86208	7.10996	6.89534
ASMM10LNC1A100010743V4	9.2579	9.19919	9.03554	9.22452	7.6115	7.24017	7.5348
ASMM10LNC1A114270920V4	3.8698	3.13286	3.20657	3.24281	5.92176	5.53187	5.7059
ASMM10P013881V4	4.21054	3.33756	3.95004	4.30516	4.6245	4.75825	4.669
ASMM10LNC1A113485550V4	8.96533	9.2575	8.5466	8.8926	9.67414	9.68893	9.66688
ASMM10AP1B118785360V4	6.54665	6.56646	5.85144	6.61865	6.35425	6.09802	6.51629
ASMM10P043258V4	4.46118	5.62314	4.96995	4.75996	4.45057	3.94713	3.96192
ASMM10LNC1A101013559V4	9.65481	9.32469	9.84083	9.72725	9.8362	10.1098	9.86043
ASMM10LNC1A100036881V4	9.03043	8.88138	8.94375	9.08846	9.73226	9.58903	9.53459
ASMM10AP1B107035145V4	8.59481	9.88001	8.2105	8.58206	6.61156	6.81008	6.60288
ASMM10LNC1A102788840V4	2.42774	2.74329	2.62932	2.35039	4.93295	4.60786	4.67742
ASMM10LNC1A111178118V4	4.19817	4.40813	4.06917	4.6421	5.62435	5.02975	4.40847
ASMM10AP1B118331758V4	11.491	11.4408	11.5069	11.3526	12.8432	13.2292	13.2959
ASMM10LNC1A108643490V4	6.0664	5.96549	6.09175	6.25124	4.67256	4.66818	4.17779
ASMM10AP1B121488297V4	3.18542	3.36926	2.79758	3.24619	4.7316	4.70499	4.64498
ASMM10P014133V4	2.42774	2.86646	2.89096	3.23257	2.32254	2.50909	2.32205
ASMM10AP1B102494167V4	11.3652	11.415	11.5664	11.5023	10.8001	10.6628	10.5197
ASMM10AP1B106790415V4	9.60977	9.09851	9.08289	9.59541	9.50053	9.75227	9.55616
ASMM10LNC1A100127177V4	2.42774	2.37482	2.34951	2.35039	2.55615	2.3219	2.32205
ASMM10LNC1A100100464V4	8.62143	8.47257	8.17154	8.65869	9.59347	9.66616	9.23739
ASMM10LNC1A106147955V4	8.73	8.36466	8.78951	8.95448	7.52939	7.74604	7.47058
ASMM10LNC1A109957709V4	8.81201	8.63934	8.82812	8.60839	7.87167	7.80134	7.95236
ASMM10LNC1A100016219V4	7.99802	10.1608	8.11558	9.02635	8.81974	8.63983	8.73019
ASMM10LNC1A107839269V4	7.06222	6.98188	6.76458	6.97787	8.06957	7.89004	7.92848
ASMM10AP1B107311633V4	6.61766	6.53426	6.56545	6.4738	5.16792	4.46083	4.36633
ASMM10LNC1A100106544V4	3.86542	3.92768	4.7036	3.86226	2.42275	3.43566	4.50245
ASMM10P039239V4	8.09866	7.92625	7.99341	8.05949	8.16276	8.15357	7.46394
ASMM10LNC1A106630752V4	4.73676	4.9713	5.1745	4.66659	3.95975	4.65229	3.35935
ASMM10LNC1A100092288V4	4.48752	3.92258	3.75119	4.22956	4.52638	5.01429	3.83689
ASMM10LNC1A100820735V4	4.45966	4.4568	4.22898	4.17213	4.35593	4.79186	4.15743
ASMM10AP1B101542670V4	12.8349	12.411	12.8395	12.5747	14.8066	15.0669	14.9595
ASMM10AP1B101064413V4	5.14004	4.62888	4.8798	4.6125	4.87971	5.12122	4.74637
ASMM10LNC1A100073654V4	2.42774	2.37482	2.34951	2.35039	2.32254	2.3219	2.32205
ASMM10LNC1A100015678V4	7.29968	9.35284	9.12783	7.26544	7.30095	7.36126	7.97941
ASMM10P018653V4	7.8476	8.33305	7.78292	7.9763	5.94146	5.60832	5.9969
ASMM10P050143V4	8.97666	9.34377	8.88334	9.53118	9.97273	10.0111	10.3065
ASMM10LNC1A105386080V4	7.18342	6.53726	7.18628	7.04049	7.58974	8.06635	7.55713
ASMM10LNC1A100085118V4	6.95785	6.86154	5.98641	8.92599	6.70442	6.25928	6.46888
ASMM10LNC1A109623156V4	5.68776	5.58053	5.57468	5.84631	5.4758	5.00246	5.12658
ASMM10LNC1A105644211V4	4.4494	4.11445	4.56876	4.50487	4.34742	4.13079	4.74643
ASMM10P021822V4	8.72779	9.2408	8.65327	9.59064	9.847	9.8057	9.94931
ASMM10P012100V4	7.2252	7.41995	7.06797	7.49761	4.2577	3.87256	3.91086
ASMM10AP1B100451856V4	7.56834	7.35053	7.28832	7.50231	7.68058	7.62167	7.7239
ASMM10AP1B110152004V4	9.32823	9.05598	9.44339	8.74107	10.6839	11.0926	11.017
ASMM10LNC1A100106634V4	12.4559	12.1842	12.3096	12.4845	11.1458	11.0876	11.1912
ASMM10LNC1A104938448V4	9.01056	9.005	8.98169	9.15728	9.61234	9.29987	9.48611
ASMM10AP1B100024925V4	10.4192	10.7739	10.2403	10.4279	8.69591	8.60944	8.61014
ASMM10AP1B126054627V4	4.16309	4.57155	4.39257	4.44872	4.9693	4.7843	4.90796
ASMM10LNC1A109445079V4	4.91392	4.53887	4.6986	4.61807	4.91169	5.05782	4.78162
ASMM10LNC1A104596764V4	5.07848	4.9989	4.8197	5.21974	5.82108	5.82911	5.81067
humanlincRNA1812+_P1V4	7.1807	7.10077	6.68119	7.17404	7.93311	7.66587	7.58535
ASMM10LNC1A100116774V4	4.74169	5.42688	4.72696	5.19626	4.64763	5.31443	5.2378
ASMM10LNC1A100130919V4	8.60604	8.44383	8.49428	8.60409	8.45691	8.32933	8.20339
ASMM10LNC1A104656973V4	6.10441	6.01013	6.05491	5.88446	6.57153	6.48997	6.53466
ASMM10LNC1A100100963V4	7.22455	7.11448	7.19635	7.43963	7.25675	7.37217	7.27812
ASMM10LNC1A108768676V4	5.56179	5.4029	5.07842	5.65591	6.69291	6.60261	6.17749
ASMM10LNC1A100010889V4	4.07915	3.54657	4.12191	4.25938	3.53134	3.00074	3.17891
ASMM10LNC1A116069563V4	8.524	8.41487	8.58908	8.29801	8.27249	8.36942	8.28584
ASMM10AP1B103327642V4	9.52073	9.52754	9.59923	9.82896	10.2787	10.0502	10.3764
ASMM10LNC1A100004945V4	16.4027	16.4896	16.3881	16.4784	16.0434	16.0485	16.0909
ASMM10AP1B105434825V4	3.4776	3.25359	3.30111	3.74897	4.66173	4.60734	4.65689
ASMM10LNC1A100084757V4	2.42774	2.37482	2.34951	2.74391	2.44824	2.3219	2.32205
ASMM10LNC1A112077708V4	7.72661	7.65018	8.20418	8.13784	7.58099	7.65283	7.55686
ASMM10LNC1A100100534V4	8.88832	8.90508	8.98769	9.02431	8.50248	8.42344	8.63301
ASMM10LNC1A101153048V4	4.75539	4.77427	4.99712	5.06574	5.48015	5.40954	5.4405
ASMM10LNC1A108645570V4	9.32221	9.06578	9.19793	9.52579	8.91557	8.70716	8.71015
ASMM10P046891V4	2.42774	2.37482	2.57968	2.35039	2.67539	2.38667	2.32205
ASMM10LNC1A110650465V4	8.56863	8.30306	8.42218	9.15422	9.48697	9.37868	9.48725
ASMM10AP1B100092015V4	7.4511	8.16782	8.59442	8.55568	8.32163	7.96666	7.90266
ASMM10LNC1A100077059V4	5.04048	4.82249	4.76318	5.02418	4.49506	4.72434	4.98252
ASMM10AP1B120042953V4	7.2512	7.10278	7.19977	7.40003	7.39455	7.20104	7.21371
ASMM10AP1B109309219V4	11.308	10.9871	10.9989	11.308	10.403	10.3957	10.3837
ASMM10LNC1A102875281V4	6.72879	6.71429	6.36673	6.56127	6.98143	6.24445	6.73306
ASMM10P030218V4	4.66835	4.55819	4.23125	4.77913	3.81695	4.12946	4.05464
ASMM10LNC1A100020591V4	4.78691	4.40188	5.00563	4.60418	5.35298	5.50315	5.57964
ASMM10LNC1A101555071V4	5.96596	6.08748	5.86729	5.96842	6.44275	6.54277	6.27327
ASMM10AP1B103699678V4	6.02083	5.83197	5.80126	6.31147	6.55831	6.67343	6.8015
ASMM10AP1B101585276V4	4.05134	2.9851	3.80046	4.06917	3.91262	3.51644	4.07325
ASMM10AP1B101254174V4	5.69729	5.20341	5.05262	5.37536	6.45046	6.36625	6.33439
ASMM10AP1B109787195V4	5.49919	5.54382	5.51727	5.67847	6.28392	6.15998	6.0956
ASMM10P057654V4	7.92995	8.41651	7.72361	7.91899	4.71016	4.91465	5.09737
ASMM10AP1B126495031V4	7.22178	7.08165	7.05685	7.18931	7.62353	7.36265	7.4725
ASMM10AP1B112127084V4	4.59388	4.32406	3.94155	4.60786	4.73668	4.50405	4.56232
ASMM10P023270V4	5.42402	5.2377	5.50686	5.63244	5.58814	5.32848	5.59227
ASMM10AP1B103190238V4	5.5497	5.52627	5.71542	5.62846	6.0967	6.02517	6.14995
ASMM10LNC1A105175172V4	4.26178	4.56025	3.13258	3.58784	4.56011	3.90691	3.90622
ASMM10LNC1A113101110V4	7.23432	7.39968	7.67302	6.79149	8.5554	8.80838	8.5717
ASMM10LNC1A103364434V4	5.46842	5.65137	5.47409	5.41166	6.0136	6.13931	6.19557
ASMM10AP1B100158433V4	4.4391	4.27252	4.13294	4.58661	5.33877	4.71612	4.44224
ASMM10AP1B109126258V4	6.96709	6.95969	7.44458	6.42202	7.18129	7.00967	6.95645
ASMM10LNC1A109336847V4	9.08149	9.0831	9.18644	9.3657	9.48859	9.41956	9.53118
ASMM10AP1B107110151V4	7.58458	8.6252	8.65523	7.4871	7.47262	7.24973	7.07637
ASMM10LNC1A101160433V4	10.6138	10.5024	10.6473	10.6613	8.7935	8.56678	8.65921
ASMM10P037278V4	6.88855	6.2565	6.4878	6.65173	6.04616	5.67869	5.91749
ASMM10AP1B100165714V4	11.3254	11.3682	11.6602	11.5231	11.2544	11.4934	11.7165
ASMM10LNC1A110680297V4	2.42774	2.37482	3.11445	2.35039	4.93703	4.59388	4.93295
ASMM10LNC1A100020767V4	4.6194	4.20734	4.49622	4.24513	3.36004	3.41568	4.35187
ASMM10LNC1A102668940V4	3.45247	3.45519	3.51882	3.40858	2.51211	2.55677	3.49072
ASMM10AP1B111597675V4	6.49578	6.25785	6.49531	6.23544	6.31891	5.9795	6.24526
ASMM10P037584V4	8.54581	8.55124	8.20479	8.54918	7.79814	7.79513	7.95618
ASMM10P051353V4	8.40161	7.99534	8.00543	8.46708	8.02659	7.80099	7.64598
ASMM10LNC1A110660935V4	16.9117	16.9329	17.0063	16.9329	16.579	16.5667	16.5736
ASMM10AP1B100084251V4	2.42774	2.37482	2.34951	2.35039	2.42496	2.3219	2.32205
ASMM10AP1B116125789V4	5.59283	5.15584	4.63531	5.59036	3.9916	4.39234	4.15129
ASMM10LNC1A100026423V4	3.71847	2.74018	3.91606	3.47782	5.02462	4.15074	4.65445
ASMM10LNC1A100026167V4	12.385	11.9861	12.1884	12.5841	10.6366	10.3056	10.5747
ASMM10LNC1A110232931V4	7.96508	7.57627	8.10096	7.88522	6.16753	6.08215	6.3025
ASMM10AP1B101145818V4	5.13527	5.25591	4.61604	4.73689	6.60036	6.48454	6.27641
ASMM10UP523V4	2.98291	3.64063	3.72461	3.10124	2.32254	2.32748	2.40326
ASMM10AP1B100185234V4	2.42774	4.34014	3.98597	4.96202	2.63007	2.53248	3.87569
ASMM10P025508V4	4.89302	5.35356	5.16133	4.95657	5.52722	5.62421	5.52866
ASMM10P039543V4	8.0953	8.2093	7.91387	8.35854	8.52432	8.47769	8.61308
ASMM10AP1B125025787V4	7.38256	8.06043	7.9142	7.78754	6.8768	6.68314	6.89171
ASMM10AP1B105707877V4	5.53015	5.54742	5.42041	5.5056	5.41607	5.15544	5.11927
ASMM10LNC1A100031959V4	3.55863	3.90415	3.90772	4.00767	4.41384	4.31128	4.76104
ASMM10LNC1A109126280V4	5.27126	5.15722	5.00999	5.2361	4.42297	4.76491	5.16531
ASMM10P015039V4	7.10576	7.56325	6.66552	6.30091	4.95696	4.43857	3.5042
ASMM10LNC1A113556657V4	5.82352	5.66062	5.61634	5.90774	6.34365	5.98518	6.5363
ASMM10LNC1A107800553V4	5.03932	5.26311	4.95654	5.22012	5.23636	4.35601	4.85881
ASMM10AP1B113451431V4	16.2461	16.318	16.4106	16.182	15.8413	15.865	15.8896
ASMM10LNC1A111377065V4	6.47915	6.57335	6.56492	6.64431	6.51165	6.47943	6.81334
ASMM10AP1B109031471V4	6.29443	6.45166	6.34841	6.62722	6.6992	6.51976	6.92516
ASMM10AP1B100058667V4	6.43159	6.10749	6.31672	5.52105	7.90563	7.90847	8.09242
ASMM10LNC1A117205220V4	12.0591	11.6224	11.6942	11.9875	12.5607	12.1373	12.0283
ASMM10LNC1A108787612V4	4.43829	4.55043	4.39991	3.03017	4.0204	4.34532	4.45457
ASMM10LNC1A106017111V4	14.0289	14.4725	14.0141	14.2352	12.9343	12.8377	12.8671
ASMM10AP1B103777871V4	6.68154	6.50713	6.60047	6.16099	7.04163	7.16888	7.10851
ASMM10AP1B118576535V4	3.66464	3.56459	3.66259	3.84832	4.34782	4.63311	4.8541
ASMM10LNC1A107480910V4	6.59653	6.31142	6.32272	6.60679	6.38451	6.49333	6.6119
ASMM10LNC1A100122015V4	3.35893	3.50703	3.0133	3.58845	2.99197	2.61679	3.3387
ASMM10AP1B100049054V4	8.18624	8.10196	8.42114	8.33108	8.9349	8.75966	9.05302
ASMM10LNC1A100010526V4	3.17311	4.10667	3.86065	3.59076	2.75323	2.71467	3.23257
ASMM10AP1B100048445V4	6.07712	5.85868	5.84842	6.31515	3.66599	4.11946	4.45273
ASMM10AP1B115459635V4	6.7924	6.81929	6.82541	7.05167	7.79116	7.58117	7.80795
ASMM10P058202V4	4.84636	4.82681	5.11122	4.69928	4.79518	4.74398	5.25728
ASMM10LNC1A108178136V4	4.10251	3.97885	3.86006	3.9141	4.61582	4.31382	4.2664
ASMM10AP1B106680341V4	5.17279	5.09684	5.44223	5.30581	4.43051	4.67066	5.28854
ASMM10AP1B100019038V4	9.77989	9.82512	9.55945	9.78326	9.3108	9.03971	9.02196
ASMM10P017517V4	4.37324	4.74578	4.53541	4.64563	4.85314	5.22169	5.32657
ASMM10AP1B100031761V4	10.8032	10.8165	10.9685	10.7272	10.8222	10.6696	10.9698
ASMM10P038330V4	4.78619	4.81774	4.64624	4.67874	3.90824	4.20173	4.06165
ASMM10LNC1A111416318V4	5.65522	5.65874	5.38873	5.51648	6.40319	6.92652	6.51465
ASMM10AP1B117116246V4	3.07883	3.62138	2.58031	2.89689	4.73025	4.27219	4.27489
ASMM10LNC1A105535459V4	8.40971	8.31052	8.27382	8.57017	7.54103	7.67095	7.713
ASMM10AP1B123570557V4	9.09035	9.78855	9.84755	9.2565	8.45508	8.24506	8.375
ASMM10LNC1A112820952V4	5.566	5.85606	5.34122	5.6755	6.43492	5.95594	6.202
ASMM10LNC1A103506058V4	9.19434	9.21147	9.0347	8.85483	8.64526	8.67032	8.75542
ASMM10AP1B100225547V4	9.43265	9.40327	9.40624	9.69163	9.06227	9.00858	9.27581
ASMM10AP1B114539103V4	11.271	11.4741	11.1367	11.4994	8.73798	8.72611	8.8851
ASMM10LNC1A114328530V4	7.44168	7.23919	7.24995	7.3855	8.05163	8.08202	8.294
ASMM10P017539V4	3.00816	3.45017	3.45895	4.26708	3.14697	3.77535	4.08932
ASMM10LNC1A100302280V4	8.99729	8.81844	9.02908	8.4562	10.2762	10.1003	10.3053
ASMM10LNC1A109074395V4	6.82798	6.9264	6.72409	6.9515	6.22006	6.40226	6.44983
ASMM10LNC1A107702312V4	6.06767	5.87444	6.47282	4.73407	8.82431	9.22289	8.9922
ASMM10LNC1A100177169V4	16.3838	16.3391	15.4077	16.3391	15.1259	15.1773	15.1635
ASMM10LNC1A117538661V4	8.31518	7.96863	8.40933	7.91113	9.00574	9.30344	9.12292
ASMM10LNC1A107646150V4	5.80083	6.15651	5.32709	5.98932	5.81535	6.05313	6.05379
ASMM10AP1B122590725V4	5.79916	5.57488	5.55125	5.9033	6.10934	5.60098	5.72449
ASMM10AP1B105015557V4	5.05507	5.51105	4.96574	5.23483	4.25626	3.50368	4.4022
ASMM10LNC1A100021041V4	11.3786	11.3793	11.3824	11.501	12.0087	11.9887	11.9953
ASMM10LNC1A108385708V4	8.02478	8.13687	8.37674	7.9105	10.2048	11.4256	10.6901
ASMM10LNC1A108172359V4	2.42774	3.13258	3.21727	3.7436	5.72907	5.52335	5.66677
ASMM10LNC1A100063732V4	5.34854	5.17251	5.70188	5.52335	4.33853	5.09044	4.59108
ASMM10P014856V4	6.32469	6.493	6.34511	6.4282	6.17951	5.94141	5.87708
ASMM10AP1B100110704V4	8.88344	8.78928	9.01575	8.78036	8.34096	8.34285	8.10662
ASMM10AP1B100113562V4	2.42774	2.37482	2.34951	2.94965	2.32254	2.3481	2.32205
ASMM10AP1B100033991V4	16.2515	16.1448	16.121	16.1892	15.3574	15.4546	15.2604
ASMM10P041690V4	5.27729	5.29364	5.38989	5.12637	5.94676	5.78865	5.64047
ASMM10AP1B126073800V4	5.85806	5.52257	5.76237	5.71905	6.36558	6.98623	6.5733
ASMM10P019713V4	3.18291	3.12021	3.5561	3.23196	4.0725	4.14496	3.9287
ASMM10LNC1A113659007V4	4.63283	4.47881	4.35047	4.60977	6.56659	6.48386	6.39705
ASMM10LNC1A104380736V4	6.00533	5.81298	5.95401	5.39502	5.60899	5.91614	5.15481
ASMM10UP391V4	6.09802	5.92847	5.86121	6.54401	4.67858	4.35304	4.31486
ASMM10P036428V4	3.37306	3.47127	3.35864	3.238	2.75911	3.13258	2.32205
ASMM10LNC1A117839452V4	5.89803	5.86042	5.79426	6.26775	7.0429	7.06797	7.20841
ASMM10AP1B109738552V4	8.97648	8.72767	8.94066	8.64632	9.51039	9.89408	9.61234
ASMM10AP1B129590370V4	5.8394	6.24184	6.3815	6.27752	7.30482	7.88365	7.91529
ASMM10LNC1A100020812V4	4.23503	3.84642	3.54168	3.73555	4.61197	4.56648	4.06785
ASMM10LNC1A100116945V4	5.67892	5.0988	5.28344	5.44599	4.61481	4.35954	4.52299
ASMM10P014038V4	12.0126	12.0911	12.1387	12.2598	12.6154	12.7765	12.8196
ASMM10LNC1A101328535V4	4.258	4.66239	4.72498	4.17245	3.31019	4.44092	4.07937
ASMM10LNC1A109377991V4	2.42774	2.37482	2.34951	2.35039	2.32254	2.3219	2.32205
ASMM10LNC1A104167527V4	8.56188	8.42778	8.27755	8.39967	9.31635	9.24204	8.69715
ASMM10AP1B113037746V4	2.42774	3.40292	3.23943	3.66671	3.23534	3.7936	2.71929
ASMM10AP1B121296923V4	3.34114	3.32357	4.08188	3.57183	3.57695	3.77258	3.51074
ASMM10LNC1A100047427V4	4.80959	4.50377	4.37122	4.96288	3.76463	3.25359	3.05378
ASMM10AP1B105166390V4	11.1457	11.2884	11.2242	10.937	11.9594	12.1093	11.551
ASMM10LNC1A100084392V4	3.20679	3.41035	3.39452	2.97192	2.72107	3.26139	2.35818
ASMM10LNC1A100683833V4	9.44339	9.34703	9.27021	9.24483	9.34377	9.14525	8.72767
ASMM10AP1B108820527V4	6.75825	6.44945	6.61821	8.09227	6.87831	7.03218	6.70633
ASMM10LNC1A107887618V4	9.89083	9.76667	9.47479	9.83244	10.7193	11.0813	10.5724
ASMM10P034282V4	7.44817	7.33598	7.30964	7.30545	8.55415	8.43187	8.09888
ASMM10LNC1A109693377V4	5.87016	6.17571	5.68037	6.26674	6.6762	6.60457	6.50584
ASMM10LNC1A100047648V4	5.84218	5.67212	5.88236	6.57166	4.94268	6.08748	5.39267
ASMM10LNC1A102231874V4	8.78284	8.46754	8.76445	8.64588	9.39887	9.64881	9.60692
ASMM10AP1B118251150V4	7.5757	7.40294	7.25328	7.5412	9.1965	9.50887	9.33098
ASMM10AP1B100110202V4	7.4093	7.41503	7.40189	7.37894	7.003	7.31299	7.07968
ASMM10P019416V4	2.42774	2.37482	2.34951	2.35039	2.90344	2.4394	2.32205
ASMM10P039872V4	6.20288	5.92176	6.63845	6.13568	7.02003	7.08733	6.67058
ASMM10AP1B122348444V4	7.83927	7.68814	7.99095	8.02664	8.93364	9.02506	9.06605
ASMM10LNC1A100581493V4	6.04672	5.97268	5.88333	6.01485	6.3224	6.4849	6.10701
ASMM10AP1B111349380V4	9.52253	9.07065	9.12893	9.4427	9.42042	9.35339	9.28115
ASMM10AP1B122626598V4	7.6408	7.48142	7.69868	7.51324	8.23523	8.13529	8.21967
ASMM10LNC1A108670856V4	12.5747	12.3125	12.4142	12.5541	12.1247	11.9016	11.7688
mouselincRNA1511+_P1V4	3.75987	3.10236	3.85676	3.47616	4.55727	4.18685	4.14285
ASMM10P017827V4	5.89232	5.59174	5.4334	5.66726	6.25486	5.59571	5.69638
ASMM10P052509V4	6.95005	7.02803	6.77065	7.13885	7.04421	6.83218	6.71265
ASMM10P057811V4	11.2139	11.2149	11.3006	11.2308	12.1464	12.014	12.0923
ASMM10AP1B100071363V4	10.6393	10.719	10.5542	10.7454	10.0489	9.7049	9.86105
ASMM10LNC1A103168950V4	7.70378	8.24506	7.76434	7.78954	5.04411	5.30057	5.60662
ASMM10LNC1A100073784V4	4.66016	4.61469	3.91857	4.43938	3.87661	3.8992	2.8232
ASMM10LNC1A108140920V4	5.51865	4.64258	5.40152	4.92596	7.3471	7.2583	7.08593
ASMM10AP1B112320488V4	8.30482	7.97194	7.95825	8.42922	9.50088	9.61649	9.49087
ASMM10LNC1A110677461V4	4.54394	4.69262	4.16309	4.65699	3.37078	3.98468	3.94611
ASMM10LNC1A100031484V4	5.57781	7.31397	7.16444	5.07536	2.32254	2.3219	2.32205
ASMM10LNC1A115250113V4	7.55672	8.17831	7.773	8.21017	7.58458	7.42926	7.388
ASMM10AP1B113648981V4	9.57062	9.43614	9.38342	9.56019	9.92602	9.86371	9.62969
ASMM10AP1B108783341V4	3.92035	2.99899	3.85079	3.4831	4.38695	4.05079	4.11257
ASMM10LNC1A100052657V4	3.50026	2.73532	2.76685	3.15501	3.62095	3.17448	3.68544
ASMM10LNC1A100063455V4	5.79119	6.20642	5.18565	6.20857	4.9194	4.71892	4.74158
ASMM10AP1B108773433V4	9.44782	9.30159	9.54672	9.79944	9.78694	9.47983	9.76117
ASMM10LNC1A117974596V4	6.79566	6.77581	6.70646	6.93377	6.51976	6.50969	6.62947
ASMM10AP1B100132615V4	7.70841	7.83278	7.61217	8.18307	7.36299	6.89909	7.21159
ASMM10LNC1A100105711V4	4.55819	4.35541	4.33345	4.79358	6.02228	5.67478	5.24445
ASMM10LNC1A100005056V4	2.42774	2.37482	2.34951	2.35039	2.35384	2.3219	2.32205
ASMM10AP1B116127481V4	7.95194	7.73156	7.99439	8.04312	9.5143	9.84542	9.88287
ASMM10P027744V4	6.51134	6.35148	6.40064	6.5348	6.37212	6.36921	6.40587
ASMM10LNC1A105266005V4	6.88261	6.55797	7.22069	6.9167	6.9828	7.24624	6.91107
ASMM10AP1B100180041V4	11.2805	11.6704	11.3046	11.3848	12.4604	12.4343	12.5833
ASMM10LNC1A100074449V4	2.42774	2.37482	2.34951	2.35039	2.32254	2.3219	2.32205
ASMM10P053524V4	4.76382	4.70445	4.49896	4.68621	3.21232	3.34156	3.05794
ASMM10LNC1A108942672V4	4.28094	3.87559	3.77313	4.016	4.12442	3.75119	4.4376
ASMM10AP1B105201548V4	9.08939	8.45736	8.81148	9.14004	9.62821	10.0748	9.77005
ASMM10AP1B123185374V4	8.92364	8.98411	8.68636	8.97467	9.47945	9.42042	9.56784
ASMM10AP1B100190342V4	8.50463	8.2139	8.20463	8.29877	9.38726	9.27414	9.23882
ASMM10LNC1A109641438V4	6.79174	6.63421	6.90271	6.67887	4.97417	5.05339	4.91252
ASMM10AP1B100023751V4	8.36272	8.96123	8.88674	8.47913	8.79972	8.70393	9.0295
ASMM10AP1B124263458V4	11.7076	11.6561	11.6476	11.8679	12.6323	12.4043	12.3705
ASMM10P025721V4	10.6275	11.0904	10.7679	10.8685	8.48541	8.55286	8.48387
ASMM10AP1B123095346V4	7.02621	6.51311	6.91341	6.66738	8.24523	8.45494	8.37552
ASMM10P023241V4	6.86825	6.76917	6.72449	6.96285	6.72671	6.84321	6.97763
ASMM10LNC1A108168905V4	8.84663	8.35288	8.61556	9.05897	7.38331	7.24425	7.51966
ASMM10P024825V4	9.43727	9.82814	9.2302	9.43401	8.60604	8.85401	8.90475
ASMM10AP1B117695495V4	4.67301	5.1926	4.92946	5.10108	5.14137	4.47443	4.50028
ASMM10AP1B109934515V4	9.11653	8.71665	9.04227	9.61073	10.146	10.3213	10.1685
ASMM10AP1B101006710V4	6.17131	5.89306	6.01615	6.18682	6.87261	6.54234	6.67626
ASMM10P057863V4	2.42774	2.37482	2.34951	2.35039	2.92651	2.37752	2.4296
ASMM10LNC1A107141255V4	7.01032	6.95845	6.74646	4.87903	6.58435	6.70943	6.61173
ASMM10AP1B119390507V4	12.5997	12.5752	12.6925	12.5446	13.7448	13.7916	13.8425
ASMM10LNC1A106045364V4	6.80647	6.54983	6.8571	6.13887	8.10468	8.42124	8.39444
ASMM10UP068V4	4.90447	4.54953	4.56232	4.63452	4.44008	4.91516	5.02418
ASMM10AP1B113688224V4	5.97304	5.75617	5.94773	6.05491	6.24419	6.26272	6.22587
ASMM10LNC1A108190092V4	7.48284	7.33505	7.31231	7.46615	7.82905	7.94493	7.97693
ASMM10LNC1A100010895V4	5.55589	5.6503	5.64608	5.774	4.28885	4.76798	4.50911
ASMM10LNC1A106889064V4	7.57672	7.25509	7.25559	7.68861	7.29787	6.74297	6.78874
ASMM10AP1B102324116V4	5.63081	5.30169	5.38945	5.03185	5.84764	6.04834	5.88042
ASMM10AP1B111623092V4	8.19689	7.86637	8.06352	7.89407	8.4419	8.34218	8.40772
ASMM10LNC1A112989811V4	9.72208	9.82067	9.65599	9.7116	10.3398	10.2311	10.4609
ASMM10P030131V4	2.42774	2.37482	2.34951	2.58111	2.32254	2.3219	2.32205
ASMM10LNC1A101139911V4	5.14276	4.84741	4.98897	4.97671	4.31284	4.06089	4.16717
ASMM10AP1B100103005V4	11.4936	11.7532	11.3625	10.9369	9.57948	9.31295	9.41985
ASMM10LNC1A106342817V4	6.48222	6.40084	6.49351	5.90462	7.17941	7.58016	7.48522
ASMM10LNC1A100042528V4	4.70228	4.68101	4.43031	4.57994	4.78691	4.67169	5.16118
ASMM10AP1B100031330V4	5.58799	5.58484	5.26814	5.18152	6.38659	6.3737	6.75478
ASMM10AP1B101852822V4	5.27614	4.96143	5.31002	5.35342	4.13856	3.81785	4.11839
ASMM10P036203V4	7.10229	7.44468	6.90979	7.72414	7.48169	7.04841	7.21542
ASMM10AP1B113779297V4	6.4366	6.18969	6.50025	6.32353	6.68627	6.26856	6.58491
ASMM10AP1B117907835V4	4.64961	4.64841	4.80507	4.77117	4.28066	4.67948	4.66521
ASMM10AP1B100033272V4	2.42774	2.37482	2.34951	2.91562	2.32254	2.3219	2.32205
ASMM10LNC1A109657644V4	5.39135	5.94931	5.83339	4.69229	3.61596	2.83922	3.1928
ASMM10AP1B100135036V4	3.82425	4.02105	4.03562	4.18933	3.60619	2.51659	2.98884
ASMM10AP1B108747744V4	10.7111	10.3384	10.3138	10.7633	10.0063	9.8105	9.9107
ASMM10LNC1A111416538V4	5.88636	5.75056	5.626	6.0636	5.86251	5.56294	5.92211
ASMM10LNC1A114880517V4	2.42774	2.37482	2.34951	2.35039	2.32254	2.3219	2.32205
ASMM10P049967V4	11.6449	11.3329	10.7746	11.1421	10.5647	10.4273	10.6213
ASMM10LNC1A100073716V4	5.30169	5.55589	5.42943	5.53887	5.23956	5.25102	4.7689
ASMM10AP1B124822572V4	9.05642	8.76393	9.14826	8.61964	8.23704	8.3235	8.45027
ASMM10AP1B100057757V4	3.30614	2.37482	2.7655	2.35039	2.32254	2.32339	2.39012
ASMM10LNC1A100058635V4	4.22685	3.34612	4.33247	4.20828	2.9344	2.3219	2.49214
ASMM10AP1B119805139V4	6.81242	6.6462	6.53245	6.66531	7.17404	7.0998	7.04006
ASMM10P058067V4	3.60491	3.92732	3.84068	4.10499	2.6885	3.31618	3.65131
humanlincRNA1133-_P1V4	2.42774	2.37482	2.34951	2.35039	3.56824	2.41366	3.15107
ASMM10P034322V4	10.9396	11.7053	10.7899	11.5951	8.12665	8.1422	8.23523
ASMM10AP1B116866739V4	8.06598	7.89317	7.84245	8.11117	8.7456	9.12893	8.92816
ASMM10AP1B110515905V4	3.94611	4.41274	4.45415	4.47081	5.75786	5.4953	5.66256
ASMM10P045453V4	5.86287	5.9274	6.23228	5.75853	4.83647	4.96755	5.10247
ASMM10LNC1A100095690V4	8.29935	8.97431	7.83672	7.70711	6.11406	5.94895	6.19522
ASMM10P033681V4	5.80077	4.56786	5.44901	5.78789	5.00939	5.53938	5.59305
ASMM10AP1B113105091V4	4.72001	4.65622	5.07397	5.11275	4.71862	4.89261	5.0432
ASMM10AP1B100177471V4	13.4482	13.4375	14.0273	13.5264	15.0879	15.25	15.5344
ASMM10AP1B118756731V4	5.89046	6.05276	6.14775	6.00518	5.24547	5.16133	5.48461
ASMM10LNC1A113050857V4	6.54889	6.41361	6.21011	6.47465	7.48653	7.52384	7.54021
ASMM10AP1B100037622V4	6.82242	6.38106	6.20212	7.34955	5.7917	5.94491	6.19003
ASMM10AP1B113045299V4	8.69851	8.54959	8.65658	9.12693	9.91143	10.0724	10.3552
ASMM10LNC1A107076039V4	4.84954	5.24893	5.22261	5.22043	5.52787	5.76638	5.4971
ASMM10UP624V4	5.23541	5.17081	5.17938	5.34277	3.34612	4.16922	4.12007
ASMM10AP1B100141245V4	7.63298	7.2199	7.25509	7.53787	7.24799	7.08818	7.19059
ASMM10LNC1A102612716V4	6.51398	6.5121	6.63263	6.44983	6.68468	6.55283	6.54215
ASMM10LNC1A103158655V4	2.42774	2.37482	2.34951	2.35039	2.32254	2.3219	2.32205
ASMM10AP1B102352774V4	8.45714	8.37123	8.3842	8.40772	8.88095	9.07613	9.0201
ASMM10AP1B106773673V4	9.78931	9.58072	9.62455	9.72773	8.50198	8.46003	8.6731
ASMM10LNC1A100010417V4	5.0613	4.83996	5.01859	5.21997	4.25859	4.21716	4.61756
ASMM10AP1B105835744V4	2.42774	2.37482	2.34951	2.35039	4.04436	3.20114	3.84754
ASMM10AP1B101494191V4	12.2836	12.2943	12.2827	12.4052	11.6795	11.4964	11.7245
ASMM10LNC1A100079554V4	4.06156	4.85972	4.7843	4.60986	2.5044	3.76077	4.74985
ASMM10AP1B126366272V4	7.33851	7.07358	7.03226	7.31646	7.31015	7.04385	7.22481
humanlincRNA1432-_P1V4	4.09952	5.42551	4.81754	4.15955	3.19987	3.37668	4.29338
ASMM10LNC1A111069930V4	2.42774	2.37482	2.34951	4.3192	3.65988	3.23074	3.75131
ASMM10AP1B117057065V4	6.69222	6.5938	6.5484	6.92025	6.13438	6.19292	6.1893
ASMM10LNC1A103145720V4	6.89667	6.60015	6.98566	7.5142	7.96561	8.04157	8.09927
MM9LINCRNAEXON10664-_P1V4	6.88356	7.87781	7.5495	7.72401	7.93047	7.69945	7.63577
ASMM10LNC1A112073031V4	2.42774	2.37482	2.34951	2.35039	2.32254	2.3219	2.43367
ASMM10LNC1A103177335V4	8.29344	8.28627	8.1711	8.32632	7.31761	7.25058	7.40014
ASMM10LNC1A106043861V4	11.569	11.9137	12.4661	10.5006	10.7604	10.4367	10.7938
ASMM10LNC1A108650915V4	2.42774	3.06052	3.17276	2.74124	5.26405	4.79656	4.95776
ASMM10AP1B109534038V4	10.0146	10.1265	9.76452	10.2207	6.79715	6.77522	6.82589
ASMM10AP1B105745440V4	3.70534	4.09816	3.09107	3.96873	5.20833	5.1144	5.36082
ASMM10P010617V4	5.25196	4.79186	5.45152	5.2742	4.56442	4.59323	4.36207
ASMM10LNC1A107393058V4	5.49853	5.53691	5.25464	5.91194	4.77164	5.02656	5.02558
ASMM10LNC1A111673650V4	3.38007	3.33496	3.48885	3.83846	4.50648	4.39846	4.44999
ASMM10AP1B108939180V4	3.96968	4.15989	4.51098	4.97027	5.4487	5.70032	5.56248
ASMM10P019743V4	14.1778	14.5278	14.1578	14.2218	12.1244	12.1438	12.1093
ASMM10LNC1A100010113V4	6.07799	6.32836	5.96988	6.27586	5.1821	5.15681	5.29073
ASMM10P031535V4	6.37321	6.2984	6.28371	6.37857	5.21634	3.45157	5.54241
ASMM10AP1B117032333V4	10.6475	10.4355	10.3123	10.75	10.5306	10.1505	10.0496
ASMM10AP1B110645521V4	2.42774	2.37482	3.55221	2.35039	2.32254	2.3219	2.32205
ASMM10AP1B111317936V4	3.99767	3.89736	3.66563	3.82577	3.80605	4.00943	3.64665
ASMM10LNC1A100005482V4	8.79714	8.52519	8.06548	9.25984	6.26945	6.55955	5.9412
ASMM10AP1B122213446V4	6.50004	6.7342	6.37598	7.25435	7.29979	7.36644	7.14123
ASMM10LNC1A100037252V4	5.9491	5.93821	6.14239	5.9692	6.21558	6.58105	6.04794
ASMM10P036174V4	9.18773	9.44827	9.20158	9.52927	9.17149	9.03876	9.06254
ASMM10AP1B100206929V4	8.56066	8.10897	8.34218	8.44532	8.48994	8.48068	8.31905
ASMM10AP1B100058268V4	8.20708	8.16027	8.15499	8.45771	8.286	8.23431	8.19607
ASMM10AP1B100171670V4	7.02613	6.63834	6.42823	7.81152	7.33841	6.86107	6.8843
ASMM10P051104V4	5.07812	5.24388	5.20028	5.10091	2.78979	3.32357	2.40881
ASMM10LNC1A102125887V4	6.50647	6.21356	5.94174	6.41474	7.01283	6.85295	6.80647
ASMM10LNC1A100042473V4	2.42774	2.37482	2.34951	2.35039	2.32254	2.3219	2.32205
ASMM10P056559V4	4.4803	4.64719	4.64424	4.19202	4.32447	4.15607	3.54738
ASMM10P014836V4	6.93356	7.49789	7.28571	5.87826	8.52417	8.16027	8.55428
ASMM10AP1B110127151V4	4.42777	4.09729	4.1011	3.96231	5.24527	4.7642	4.15932
ASMM10P018722V4	5.42334	5.61286	5.41862	5.30373	5.17676	5.18141	4.52317
ASMM10LNC1A102216302V4	9.58744	9.37649	9.57303	9.38375	10.4459	10.4173	10.2795
ASMM10LNC1A105448227V4	9.75102	9.34632	9.49737	9.9442	10.848	11.0849	10.9183
ASMM10P046744V4	4.45625	4.11905	4.14617	4.56358	3.67121	4.14655	3.898
ASMM10P018157V4	6.83854	7.02715	6.61828	7.03863	5.8162	5.99992	6.01881
ASMM10P017540V4	2.42774	2.37482	2.76669	2.9272	3.35787	2.87065	2.47461
ASMM10LNC1A100646305V4	3.19792	2.98639	3.51546	3.03165	5.20608	3.5615	3.96418
ASMM10LNC1A100016145V4	5.05968	5.63957	5.20622	4.63656	2.55358	3.59308	2.37693
ASMM10LNC1A118483376V4	6.35015	5.72612	5.88826	6.12207	7.98859	7.81352	7.85241
ASMM10LNC1A101218942V4	6.56396	6.86161	6.47595	6.44656	5.06637	5.42873	4.9447
ASMM10LNC1A102153494V4	8.98429	8.84393	9.12852	8.96922	8.8004	8.86749	8.15512
ASMM10AP1B100046399V4	12.3214	12.4938	12.5956	12.0098	13.0327	12.9089	13.1341
ASMM10P042018V4	4.82431	4.90572	4.44742	4.85785	4.76371	4.69049	4.03333
ASMM10LNC1A100068699V4	7.46403	8.45649	8.45847	7.40258	7.02267	6.97442	6.47197
ASMM10LNC1A107605944V4	14.2397	14.3307	14.5876	13.5653	11.8476	11.7731	11.7107
ASMM10UP018V4	2.42774	2.37482	2.34951	2.35039	2.32254	2.3219	2.32205
ASMM10AP1B100176007V4	6.03213	6.19097	6.18388	6.24926	7.20747	7.11398	6.80089
ASMM10LNC1A100063237V4	10.6488	11.0815	10.4545	10.8152	7.72689	7.90355	7.73596
ASMM10LNC1A100016179V4	7.5707	8.03687	7.93688	7.4193	3.9178	4.46291	4.11555
ASMM10AP1B106533096V4	7.16379	7.00925	7.13388	7.21565	8.05711	7.80673	7.70939
ASMM10LNC1A108171546V4	9.37283	9.28945	9.51785	9.19354	11.573	11.5552	11.6735
ASMM10LNC1A100031742V4	4.89036	4.95094	4.98714	4.93964	4.23052	4.93908	4.96039
ASMM10LNC1A107302082V4	3.58393	3.50909	3.02569	3.56459	3.39941	3.68328	3.99482
ASMM10AP1B109442551V4	12.9094	12.874	13.4103	12.6757	10.9948	11.1505	11.1771
ASMM10P028578V4	3.1525	3.1819	2.86186	3.11532	2.66955	2.3219	2.6177
ASMM10P046616V4	6.07963	5.96146	5.86772	5.74344	5.26717	4.8621	5.15925
ASMM10P022162V4	8.52278	8.48086	8.30815	8.54563	7.20402	7.18658	7.30861
ASMM10AP1B120114821V4	5.03372	4.43011	4.77885	4.42333	5.05491	4.90255	4.6262
ASMM10P057837V4	2.42774	2.37482	2.34951	2.35039	2.32254	2.3219	2.32205
ASMM10UP809V4	2.42774	2.37482	2.34951	2.97514	2.61565	2.3219	2.32205
ASMM10LNC1A109459833V4	3.74711	3.24234	3.24469	3.81843	5.22457	4.86544	5.14096
mouselincRNA0440+_P1V4	2.42774	2.37482	2.34951	2.68545	2.32254	2.32808	2.32205
ASMM10AP1B110718175V4	9.86883	9.43727	9.56583	9.72321	9.89009	9.79894	9.73661
ASMM10LNC1A100109182V4	3.22712	2.37482	2.34951	2.35039	2.69036	3.22712	2.56003
ASMM10LNC1A117205457V4	5.75681	5.767	5.88516	5.834	6.61574	6.49324	6.68137
MM9LINCRNAEXON10667+_P1V4	8.33576	8.14308	8.37113	8.44134	8.4038	8.32128	8.23184
ASMM10AP1B109064305V4	6.16587	5.91088	5.83235	6.16608	5.42418	5.46034	5.27755
ASMM10LNC1A101252156V4	9.18568	9.71989	9.60675	9.31027	8.13241	7.94808	8.02815
ASMM10LNC1A100095153V4	8.69167	8.53919	8.54021	8.77395	9.32158	9.15659	9.20297
ASMM10AP1B118282130V4	6.32743	6.3292	6.47932	6.42739	6.99066	6.97482	6.81008
ASMM10AP1B100769720V4	6.37971	5.74564	5.81893	6.25303	7.74116	7.87817	7.86656
ASMM10AP1B111670713V4	8.69795	8.38983	8.84546	8.42399	10.1194	10.4538	10.3547
ASMM10P015187V4	5.94539	5.82097	5.65005	4.90592	6.44309	6.10749	6.03261
ASMM10P037462V4	7.29557	6.83774	6.91332	7.05045	7.03951	6.32884	6.42879
ASMM10LNC1A100025861V4	6.05864	7.23593	7.10482	6.30256	2.32254	2.3219	2.32205
ASMM10P023958V4	5.45728	5.80006	5.84709	5.23862	4.80656	4.90328	5.11513
ASMM10AP1B115393126V4	7.15581	7.13752	7.32983	7.30143	7.83702	7.96129	7.91096
ASMM10LNC1A101085942V4	5.84623	6.19395	5.65077	5.59867	5.25464	4.55347	4.06772
ASMM10P031315V4	6.01572	6.74476	6.34287	6.388	6.80408	6.50937	6.67947
ASMM10LNC1A106119330V4	7.80443	7.81227	7.94282	8.02709	7.02102	6.9305	6.90948
ASMM10LNC1A104163595V4	4.69139	4.50293	4.46889	4.71524	4.72531	5.29402	4.65518
ASMM10AP1B100059904V4	14.3449	14.4298	14.4428	14.9818	14.848	14.7332	14.932
ASMM10AP1B101798442V4	8.61014	9.38213	9.42013	8.6655	8.66312	8.66672	8.72148
ASMM10LNC1A111651480V4	5.57598	5.20409	5.40829	5.53512	5.83387	5.80524	6.28004
ASMM10AP1B125270024V4	5.10612	4.85743	4.56415	4.88556	6.22159	5.80783	5.61799
ASMM10LNC1A100085057V4	6.55102	6.36296	6.46372	6.67661	7.22608	7.06428	6.967
ASMM10LNC1A105837590V4	4.04601	3.97736	3.88781	4.06357	4.85753	4.09431	4.42272
ASMM10P031542V4	2.42774	2.37482	2.34951	2.35039	3.97356	2.3219	2.32205
ASMM10AP1B102209644V4	10.3884	10.2191	10.4615	9.75738	11.318	11.482	11.4175
ASMM10P011092V4	13.4791	14.1674	13.4066	13.8775	8.46074	8.40998	8.50834
ASMM10UP525V4	7.53971	7.20122	7.17643	7.45588	6.90063	6.75029	6.67799
ASMM10AP1B100186012V4	7.69596	8.39327	8.35533	7.9601	8.03287	8.21126	8.26573
ASMM10AP1B100074585V4	9.67588	9.54593	9.68	9.69274	9.72813	9.75289	9.73513
mouselincRNA1607+_P1V4	5.09665	5.40954	5.08248	5.48369	5.45302	5.0788	5.61783
ASMM10LNC1A105979017V4	3.69868	3.76637	3.7547	3.48447	5.66919	5.20014	5.10626
ASMM10LNC1A100121990V4	6.38394	6.25016	6.60936	6.36463	6.99887	6.74363	6.7022
ASMM10AP1B115569341V4	6.9305	6.80199	7.08104	6.91634	7.60248	7.62644	7.6213
ASMM10AP1B100084775V4	2.42774	2.37482	2.34951	2.35039	3.56005	2.3219	3.02242
ASMM10LNC1A100095000V4	7.98827	7.95609	7.91193	7.78307	7.97896	7.82601	8.11885
ASMM10P013851V4	5.04707	6.09282	3.28437	7.23794	3.03917	2.3219	2.49773
ASMM10LNC1A107839962V4	6.43609	5.9906	5.76483	6.15355	4.93986	5.07607	5.06047
ASMM10LNC1A117703265V4	7.71908	7.1514	7.40215	8.19833	8.42271	8.69247	8.69488
ASMM10LNC1A108650858V4	9.78056	9.66429	9.72321	9.7549	9.08404	8.9092	8.94348
ASMM10AP1B101888872V4	12.079	11.805	12.2841	12.7073	13.6517	13.7356	13.9346
ASMM10AP1B100040148V4	6.57694	6.45682	7.2717	6.39036	6.62947	6.40185	7.41216
ASMM10P057942V4	3.58907	2.75203	3.12235	3.39465	3.24076	3.08403	2.73438
ASMM10LNC1A113810015V4	6.29765	5.92438	5.83824	6.08563	6.09709	5.8866	5.96002
humanlincRNA2190-_P1V4	5.11907	4.89478	5.19805	4.9401	4.05211	3.90939	4.18033
ASMM10AP1B100040535V4	2.42774	2.37482	2.34951	2.35039	2.32254	2.3219	2.32205
ASMM10AP1B110700676V4	2.42774	2.88138	3.17407	2.89884	2.62859	2.3219	2.32205
ASMM10AP1B107660934V4	8.05639	7.78373	7.93777	7.92385	8.28542	8.54348	8.24979
ASMM10P046336V4	6.3405	6.2088	6.12109	6.14721	6.24649	6.3773	6.43894
ASMM10P015872V4	6.96574	7.01933	6.90776	7.41899	6.45854	6.34727	6.76648
ASMM10AP1B100040790V4	6.85504	6.75983	7.72982	6.31475	8.35652	8.31228	8.68859
ASMM10AP1B121859122V4	15.6167	15.4467	15.5215	15.6483	15.8982	15.7636	15.7614
ASMM10LNC1A108626487V4	8.20568	8.10997	8.1213	8.33965	8.4599	8.41988	8.48209
ASMM10P026350V4	7.20441	7.28683	7.07895	7.23956	7.60752	7.37048	7.62001
ASMM10AP1B117882844V4	5.71079	5.99404	5.79293	5.81486	5.25813	5.53981	5.51473
ASMM10AP1B110368125V4	6.14965	6.00092	6.01338	6.28025	6.02577	5.72483	5.78144
ASMM10LNC1A110024541V4	8.46654	8.45965	8.99712	7.78812	8.48795	8.3507	8.47451
ASMM10AP1B100936391V4	7.98551	7.87829	7.97059	7.98729	8.06652	7.7919	8.05757
ASMM10AP1B103275927V4	4.81303	5.60621	5.87744	5.93053	6.2683	5.95492	6.02178
ASMM10LNC1A100010595V4	5.90212	7.64974	7.71732	5.67994	2.91348	2.44575	3.53067
ASMM10AP1B100144450V4	16.5425	16.5558	16.9021	16.6928	16.7303	16.7509	16.7802
ASMM10LNC1A100105815V4	14.4725	14.4577	14.6089	14.4648	13.6974	13.4605	13.5036
ASMM10AP1B101737572V4	7.13782	6.93562	7.26278	7.19613	7.49478	7.64458	7.68978
ASMM10AP1B109868858V4	3.51924	3.75259	3.81302	4.03894	4.64091	4.05225	4.78779
ASMM10LNC1A106928854V4	9.48624	9.40845	9.23664	9.75831	8.98339	8.88892	8.93259
ASMM10LNC1A100020821V4	7.13664	7.15708	7.58145	7.51705	6.64704	6.34935	6.76983
ASMM10LNC1A103668928V4	4.08879	4.2274	3.88656	4.41921	4.52707	4.18166	4.63685
ASMM10UP680V4	2.42774	2.37482	2.34951	2.35039	3.34186	3.26265	3.25318
ASMM10LNC1A109702377V4	8.85387	8.59403	8.44791	9.18862	9.51147	9.53347	9.58596
ASMM10P057981V4	4.89398	4.88679	5.22169	5.23605	3.88992	3.95889	3.75415
ASMM10LNC1A100026043V4	3.62903	3.69106	3.8809	3.6415	2.70702	3.15978	3.8001
ASMM10LNC1A100098441V4	10.515	10.6943	10.6701	10.5578	9.95172	9.83244	10.1111
ASMM10LNC1A100058347V4	3.41248	3.52406	2.91348	3.27857	2.32254	2.3989	2.32205
ASMM10AP1B118457267V4	3.91109	3.91457	4.04017	3.92969	5.23862	4.16791	5.30743
ASMM10LNC1A101124773V4	3.93175	4.27924	4.5078	4.06972	4.35102	3.8371	4.76553
ASMM10LNC1A112857907V4	8.38553	9.33975	9.21223	8.57222	7.50063	7.71987	7.8264
ASMM10LNC1A107656004V4	7.69879	7.57926	7.44468	7.71614	8.0015	7.93925	8.09858
ASMM10AP1B100016122V4	11.4049	11.4348	11.4188	11.482	10.9405	10.719	10.7335
ASMM10LNC1A100111176V4	9.58437	9.96571	9.3657	9.60704	7.56258	7.63832	7.75542
ASMM10LNC1A100016140V4	5.72313	6.57984	6.81283	6.34358	5.65895	6.01284	6.42108
ASMM10AP1B104895819V4	3.7661	3.24281	3.38779	3.39121	3.20519	3.26594	3.8855
ASMM10AP1B103251128V4	11.897	12.6228	12.491	12.6395	12.5292	12.5067	12.9236
ASMM10LNC1A109300851V4	7.32752	7.64129	7.36209	7.49817	6.98767	7.21398	7.50972
ASMM10AP1B111379802V4	2.42774	2.37482	2.34951	2.35039	2.82648	2.33021	3.30368
ASMM10LNC1A100011368V4	4.81588	4.81726	4.75349	4.86921	6.04969	5.64303	6.13004
ASMM10LNC1A100037194V4	7.16474	7.18581	7.19851	7.17104	6.08824	6.62081	6.62468
ASMM10AP1B115244811V4	7.81084	7.86682	7.87961	8.00511	8.19388	8.04726	7.96454
ASMM10P037138V4	2.42774	2.37482	2.34951	3.86757	2.32254	2.3219	2.32205
ASMM10AP1B116867369V4	10.0431	10.0029	10.0125	10.1286	9.60175	9.74587	9.90634
ASMM10LNC1A100057571V4	8.33587	8.66749	8.22401	9.42042	8.13933	8.19055	7.84044
ASMM10P026400V4	6.0763	5.90988	6.17671	8.02941	3.91457	3.68161	3.95955
ASMM10AP1B113925773V4	5.73338	5.39598	5.47473	5.50085	4.51236	4.1028	4.22956
ASMM10AP1B112947507V4	10.0975	9.70862	9.7765	10.2739	9.70179	9.37761	9.3767
ASMM10LNC1A108414925V4	5.86825	6.2244	5.53995	5.94991	5.32636	5.50085	5.55412
ASMM10LNC1A106857930V4	9.59271	9.57077	9.61784	9.58084	9.0807	9.1039	9.10163
ASMM10AP1B103952512V4	10.146	10.0276	10.0656	9.62221	10.3083	10.2407	10.5011
humanlincRNA2406-_P1V4	4.2212	4.54764	4.11476	4.89404	3.68846	3.90794	4.33527
ASMM10P015530V4	2.42774	2.37482	2.34951	2.35039	3.26013	2.85534	2.41618
ASMM10AP1B100148386V4	2.42774	2.37482	2.34951	2.35039	2.32254	2.48155	2.32205
ASMM10LNC1A107304080V4	8.63983	8.88109	8.30073	8.59501	6.47778	6.75576	6.61833
ASMM10AP1B105405263V4	6.43986	6.12171	6.12753	5.86729	7.00146	6.94236	7.02376
ASMM10LNC1A108639407V4	5.81366	5.7396	5.58333	7.48422	6.69427	6.86389	6.53536
ASMM10AP1B128321933V4	6.68379	6.51993	6.54902	6.86466	7.00658	7.17659	7.10704
ASMM10LNC1A106011004V4	13.248	13.1085	13.0021	13.5249	11.8221	12.115	12.1623
ASMM10LNC1A100047228V4	4.08771	4.28809	3.08275	4.75506	3.22324	2.3219	2.84483
ASMM10AP1B100177608V4	7.39442	7.52657	7.44562	6.46788	7.84589	7.86452	8.13456
ASMM10AP1B113060179V4	2.42774	2.37482	2.34951	2.35039	2.32254	2.46719	2.32205
ASMM10AP1B100014178V4	7.0703	6.96249	7.11043	7.61508	6.10675	6.14229	6.25872
ASMM10LNC1A115644317V4	4.04826	4.29242	4.04569	4.34864	4.53002	4.98053	4.75314
ASMM10UP841V4	2.42774	2.37482	2.34951	2.35039	2.32254	2.3219	2.40617
ASMM10AP1B104698741V4	12.076	12.0828	12.4472	12.3222	11.2135	11.1323	11.1605
ASMM10LNC1A100047738V4	3.92123	3.60103	3.91595	3.86214	5.18052	4.99074	5.19168
ASMM10AP1B116439432V4	4.11179	4.01932	4.09206	3.45676	2.82761	4.4228	3.09639
ASMM10LNC1A111987895V4	9.31922	10.0819	9.576	9.81104	9.00007	9.07258	9.276
ASMM10AP1B100192080V4	11.6861	11.9439	11.7853	11.7688	13.4517	13.8216	13.7038
ASMM10LNC1A106053066V4	8.66427	8.54986	8.85709	8.77869	9.16012	9.14865	8.81814
ASMM10AP1B103272108V4	9.226	9.15094	9.26531	9.21367	8.59265	8.50977	8.11097
ASMM10LNC1A110056286V4	6.49272	6.37708	6.30512	6.35	5.92142	6.18711	5.68598
ASMM10P039358V4	4.9617	5.27553	4.51292	5.14566	2.32254	2.3413	2.32205
ASMM10AP1B113970588V4	7.16012	7.1898	6.9682	7.1541	7.6436	7.77757	7.41307
ASMM10AP1B100050337V4	7.33049	7.1687	7.21635	7.47213	7.34477	7.33097	6.77536
ASMM10AP1B100151243V4	5.21381	5.01306	5.19774	4.64478	4.81562	5.47324	4.65383
ASMM10AP1B102789064V4	8.58908	8.42271	8.47556	8.33858	8.68019	8.7621	8.58463
ASMM10LNC1A103934985V4	4.74002	4.63983	4.59323	4.72498	5.84595	5.9295	5.83162
ASMM10LNC1A100056544V4	12.7582	12.3186	12.675	12.4741	12.3508	12.1455	12.2051
ASMM10AP1B100001829V4	5.02687	4.93803	5.16681	4.66412	4.91631	4.8461	4.38061
ASMM10LNC1A100116871V4	3.35787	3.18102	2.89647	5.51558	3.52383	3.03165	2.64142
ASMM10AP1B100113190V4	11.7982	11.8263	11.9129	11.8656	10.141	10.0427	9.69316
ASMM10LNC1A116411099V4	6.32891	6.71149	6.13542	6.66867	6.17603	6.37752	6.12421
ASMM10AP1B100168393V4	9.7549	9.27562	9.73496	10.0302	9.68167	9.50176	9.40091
ASMM10P018734V4	6.99688	7.05334	7.18649	5.78596	7.3899	7.52365	7.12568
ASMM10LNC1A100090187V4	2.42774	2.81789	2.87706	2.58961	3.60218	4.28267	2.46518
ASMM10LNC1A108662850V4	7.36107	7.22633	7.65123	7.00408	7.99173	8.10196	8.05459
ASMM10LNC1A102282308V4	9.03595	9.56819	9.5165	8.88062	8.89845	8.73097	8.2867
ASMM10LNC1A100053041V4	12.1187	11.9669	11.9016	12.1262	10.948	10.8833	10.3788
ASMM10P016952V4	4.84351	4.62366	4.71426	4.33592	5.05808	5.21063	3.93505
ASMM10LNC1A100052746V4	5.77049	5.51727	5.75368	5.67105	4.711	4.59537	4.02385
ASMM10LNC1A102652561V4	6.00764	5.76888	5.91117	5.92262	5.17882	5.13311	4.65398
ASMM10LNC1A105679369V4	3.16999	3.0959	2.9225	2.70761	4.34137	4.0641	2.68906
ASMM10P044006V4	3.44203	3.80398	3.85637	4.03939	5.15961	4.33527	4.48447
mouselincRNA1630-_P1V4	2.91012	2.37482	2.34951	2.79955	3.46837	3.44171	3.35495
ASMM10P050124V4	2.42774	2.37482	2.34951	2.35039	2.32254	2.3219	2.32205
ASMM10AP1B106926765V4	8.69703	8.316	8.62628	8.66672	10.1015	10.4223	10.1837
ASMM10LNC1A114051863V4	6.6546	6.96075	6.99008	6.84689	6.45994	6.33271	6.46189
ASMM10LNC1A114061113V4	11.7303	11.5964	11.7447	11.6713	10.1631	10.0128	10.0231
ASMM10AP1B100202137V4	7.62266	7.25955	7.59968	7.65335	7.58488	7.69362	7.48645
ASMM10AP1B115700602V4	7.45992	6.76689	8.25066	7.13993	8.42414	8.98213	9.19158
ASMM10LNC1A100010943V4	8.33516	8.54135	8.68115	8.00294	9.55459	9.60831	9.37605
ASMM10AP1B124873653V4	7.31616	7.22839	7.06613	7.61387	7.02681	6.86648	6.95835
ASMM10LNC1A100080781V4	8.75092	8.74902	8.42871	9.20666	7.66018	7.54167	7.60329
ASMM10AP1B111481080V4	4.58212	4.51708	4.09407	4.59133	5.19557	4.88348	4.81555
ASMM10AP1B111829216V4	6.01348	5.61957	5.6467	5.90758	5.21361	5.40263	5.42621
ASMM10LNC1A100121398V4	8.14477	9.17377	8.79692	8.27517	7.5696	7.24713	7.23012
[truncated: 58,651 more rows]

## Sheet: Metadata Example
SERIES
title	Development of gene expression signatures for practical radiation biodosimetry
summary	To further development of our gene expression approach to biodosimetry, we have employed whole genome microarray expression profiling as a discovery platform to identify genes with the potential to distinguish radiation dose across an exposure range relevant for medical decision-making in a radiological emergency. Human peripheral blood from healthy donors was irradiated ex vivo, and a 74-gene co…
overall design	Radiation induced gene expression in human blood was measured at 6 and 24 hours after exposure to doses of 0, 0.5, 2, 5 and 8 Gy g-rays. Five independent experiments were performed at each time (6 or 24 hours) using different donors for each experiment.
contributor	Jane,Doe
contributor	John,A,Smith
SAMPLES
# The corresponding example matrix table is included in the next worksheet.
Sample name	title	raw data file	source name	organism	characteristics: tissue	characteristics: gender	characteristics: age	molecule	label	description	platform or Agilent design ID
GF200_001	ExVivoBlood_6hr_0Gy_rep1	GF200_001.txt	Peripheral Blood, 6hr, 0Gy, replicate 1	Homo sapiens	whole blood	male	39y	total RNA	Cy3	Gene expression after 6hr in 0Gy-irradiated human blood	Agilent-012391
GF200_002	ExVivoBlood_6hr_0.5Gy_rep1	GF200_002.txt	Peripheral Blood, 6hr, 0.5Gy, replicate 1	Homo sapiens	whole blood	male	39y	total RNA	Cy3	Gene expression after 6hr in 0.5Gy-irradiated human blood	Agilent-012391
GF200_003	ExVivoBlood_6hr_2Gy_rep1	GF200_003.txt	Peripheral Blood, 6hr, 2Gy, replicate 1	Homo sapiens	whole blood	male	39y	total RNA	Cy3	Gene expression after 6hr in 2Gy-irradiated human blood	Agilent-012391
GF200_004	ExVivoBlood_6hr_5Gy_rep1	GF200_004.txt	Peripheral Blood, 6hr, 5Gy, replicate 1	Homo sapiens	whole blood	male	39y	total RNA	Cy3	Gene expression after 6hr in 5Gy-irradiated human blood	Agilent-012391
GF200_005	ExVivoBlood_6hr_8Gy_rep1	GF200_005.txt	Peripheral Blood, 6hr, 8Gy, replicate 1	Homo sapiens	whole blood	male	39y	total RNA	Cy3	Gene expression after 6hr in 8Gy-irradiated human blood	Agilent-012391
GF200_006	ExVivoBlood_12hr_0Gy_rep1	GF200_006.txt	Peripheral Blood, 12hr, 0Gy, replicate 1	Homo sapiens	whole blood	female	20y	total RNA	Cy3	Gene expression after 12hr in 8Gy-irradiated human blood	Agilent-012391
GF200_007	ExVivoBlood_12hr_0.5Gy_rep1	GF200_007.txt	Peripheral Blood, 12hr, 0.5Gy, replicate 1	Homo sapiens	whole blood	female	20y	total RNA	Cy3	Gene expression after 12hr in 8Gy-irradiated human blood	Agilent-012391
GF200_008	ExVivoBlood_12hr_2Gy_rep1	GF200_008.txt	Peripheral Blood, 12hr, 2Gy, replicate 1	Homo sapiens	whole blood	female	20y	total RNA	Cy3	Gene expression after 12hr in 8Gy-irradiated human blood	Agilent-012391
GF200_009	ExVivoBlood_12hr_5Gy_rep1	GF200_009.txt	Peripheral Blood, 12hr, 5Gy, replicate 1	Homo sapiens	whole blood	female	20y	total RNA	Cy3	Gene expression after 12hr in 8Gy-irradiated human blood	Agilent-012391
GF200_010	ExVivoBlood_12hr_8Gy_rep1	GF200_010.txt	Peripheral Blood, 12hr, 8Gy, replicate 1	Homo sapiens	whole blood	female	20y	total RNA	Cy3	Gene expression after 12hr in 8Gy-irradiated human blood	Agilent-012391
PROTOCOLS
growth protocol
treatment protocol	Freshly drawn peripheral blood from healthy volunteers was irradiated, then diluted 1:1 with RPMI 1640 medium supplemented with 10% heat-inactivated fetal bovine serum. The cultures were incubated for 6 or 24 hours at 37 ºC in a humidified incubator with 5% CO2.
extract protocol	RNA was prepared using the Versagene Blood RNA Purification kit (Gentra Systems, Minneapolis MN) following the manufacturer's recommendations. The protocol includes differential lysis of red and white blood cells, and an on-column DNase digestion. Globin message was further reduced using GLOBINclear (Ambion Inc., Austin, TX) to specifically remove both a- and b- globin. RNA was quantified using a…
label protocol	Cyanine-3 (Cy3) labeled cRNA was prepared from 0.5 ug RNA using the One-Color Low RNA Input Linear Amplification PLUS kit (Agilent) according to the manufacturer's instructions, followed by RNAeasy column purification (QIAGEN, Valencia, CA). Dye incorporation and cRNA yield were checked with the NanoDrop ND-1000 Spectrophotometer.
hyb protocol	1.5 ug of Cy3-labelled cRNA (specific activity >10.0 pmol Cy3/ug cRNA) was fragmented at 60°C for 30 minutes in a reaction volume of 250 ml containing 1x Agilent fragmentation buffer and 2x Agilent blocking agent following the manufacturers instructions. On completion of the fragmentation reaction, 250 ml of 2x Agilent hybridization buffer was added to the fragmentation mixture and hybridized to …
scan protocol	Slides were scanned immediately after washing on the Agilent DNA Microarray Scanner (G2505B) using one color scan setting for 1x44k array slides (Scan Area 61x21.6 mm, Scan resolution 10um, Dye channel is set to Green and Green PMT is set to 100%).
data processing	The scanned images were analyzed with Feature Extraction Software 9.1 (Agilent) using default parameters (protocol GE1-v1_91 and Grid: 012391_D_20060331) to obtain background subtracted and spatially detrended Processed Signal intensities. Features flagged in Feature Extraction as Feature Non-uniform outliers were excluded.
value definition	Normalized signal intensity

## Sheet: Matrix Example
# Truncated example of a matrix table. The ID_REF column includes Agilent Probe Names matching the ID column of the GPL6848 platform.
# Column names match the Sample names in the metadata worksheet.
# "Feature Numbers" column included if Probe Names are not unique.
ID REF	Feature Numbers	GF200_001	GF200_002	GF200_003	GF200_004	GF200_005	GF200_006	GF200_007	GF200_008	GF200_009	GF200_010
A_32_P223017	3	2.564	2.936	1.611	1.895	1.693	1.598	1.42	1.406	1.648	2.12
A_24_P935782	4	0.951	0.682	0.25	0.795	0.388	0.467	0.146	0.377	0.172	0.411
A_24_P343695	5	0.176	0.142	0.024	0.169	0.132	0.17	0.04	0.148	0.043	0.144
A_32_P109901	6	1.359	1.271	0.475	1.799	1.111	1.931	0.662	1.962	0.908	0.919
A_32_P158786	8	13.028	17.314	16.81	9.78	13.919	11.375	18.059	17.41	12.921	11.815
A_23_P15864	9	0.445	0.331	0.144	0.443	0.399	0.279	0.202	0.417	0.184	0.263
A_32_P171530	10	1.705	1.204	1.354	1.55	0.908	1.262	0.642	2.124	1.43	0.797
A_24_P925413	12	1.089	1.269	0.624	3.147	2.214	2.97	2.136	1.783	1.916	0.469
A_24_P305993	13	0.314	0.108	0.025	0.339	0.122	0.355	0.048	0.27	0.059	0.068
A_24_P166931	15	5.633	1.787	1.23	1.207	6.912	1.339	4.087	5.483	2.201	0.804
A_23_P29067	16	0.358	0.075	0.059	0.166	0.287	0.196	0.082	0.241	0.061	0.122
A_32_P58999	17	0.367	0.117	0.058	0.414	0.21	0.211	0.077	0.258	0.044	0.261
A_23_P218608	18	0.294	0.143	0.061	0.245	0.275	0.299	0.051	0.176	0.047	0.127
A_32_P188127	19	0.329	0.159	0.036	0.287	0.168	0.15	0.053	0.229	0.03	0.119
A_23_P148798	20	0.434	0.156	0.092	0.157	0.137	0.203	0.042	0.171	0.064	0.118
A_24_P920188	22	0.892	0.485	0.156	0.836	0.468	0.516	0.206	0.915	0.238	0.355
A_24_P220058	23	0.345	0.139	0.059	0.426	0.536	0.184	0.067	0.373	0.11	0.201
A_24_P365523	24	1.444	1.044	0.583	1.487	1.437	0.823	0.891	1.161	0.964	0.988
A_23_P153320	25	1.409	2.316	1.128	0.851	0.96	0.947	1.207	1.288	0.861	0.748
A_24_P287826	26	0.182	0.301	0.078	0.205	0.281	0.113	0.037	0.177	0.053	0.074
A_23_P87678	27	2.73	1.035	0.562	3.603	1.753	1.751	0.593	1.151	0.694	0.78
A_23_P120504	29	8.585	14.84	6.292	7.56	8.31	13.421	8.744	10.692	10.479	12.375
A_32_P159668	30	0.534	39.018	0.275	3.106	0.395	0.561	0.251	0.65	0.263	0.451
A_24_P318939	31	0.292	0.744	0.059	0.324	0.26	0.209	0.118	0.325	0.074	0.135
A_32_P122907	32	0.452	0.922	0.472	0.718	0.532	0.288	0.121	0.44	0.102	0.182
A_23_P327643	33	1.889	0.747	0.364	1.841	1.773	4.075	1.256	0.917	0.759	0.359
A_23_P211110	34	0.964	0.61	0.171	0.73	0.512	0.772	0.375	0.534	0.247	0.266
A_24_P279870	36	0.777	0.234	0.218	0.428	0.506	0.297	0.144	0.435	0.202	0.126
A_24_P252223	37	0.397	0.468	0.369	0.553	0.622	0.345	0.33	0.502	0.311	0.36
A_23_P202484	38	0.303	0.198	0.301	0.234	0.207	0.288	0.141	0.207	0.135	0.12
A_23_P422851	39	0.28	0.105	0.077	0.241	0.109	0.152	0.043	0.227	0.1	0.072
A_23_P251342	40	0.269	0.078	0.026	0.113	0.095	0.156	0.026	0.231	0.04	0.059
A_23_P216068	41	1.064	0.635	0.347	0.48	0.659	0.874	0.109	0.82	0.303	0.405
A_23_P334892	43	0.68	0.144	0.17	0.265	0.215	0.568	0.12	0.233	0.193	0.116
A_24_P373096	44	0.197	0.162	0.044	0.153	0.237	0.195	0.058	0.187	0.069	0.099
